# Supplementary material for: A comprehensive and quantitative review of dark fermentative biohydrogen production
Source: PubMed Central journal article supplement (PMC3443015; doi:10.1186/1475-2859-11-115), 2012-08-27
Supplement: 1475-2859-11-115-S1.pdf [file 1475-2859-11-115-S1.pdf]

**Additional file 1:** Strains reported to produce biohydrogen without the possibility to calculate or retrieve quantitative results

| Genus                       | Species                   | Strain      | Temperature [°C] | pH  | Substrate              | Reference <sup>†</sup> |
|-----------------------------|---------------------------|-------------|------------------|-----|------------------------|------------------------|
| <i>Alcaligenes</i>          | <i>eutrophus</i>          | DSM 1348    | 30               | 6.0 | gluconate              | [90]                   |
| <i>Alcaligenes</i>          | <i>eutrophus</i>          | DSM 428     | 30               | 6.0 | gluconate              | [90]                   |
| <i>Alkalibacter</i>         | <i>saccharofermentans</i> | DSM 14828   | 35               | 9.0 | glucose                | [91]                   |
| <i>Aminobacterium</i>       | <i>colombiense</i>        | DSM 12261   | 37               | 7.3 | alanine                | [92]                   |
| <i>Anaerobranca</i>         | <i>horikoshii</i>         | DSM 9786    | 57               | 8.5 | yeast extract          | [93]                   |
| <i>Anaerobranca</i>         | <i>horikoshii</i>         | DSM 9786    | 57               | 8.5 | yeast extract/fumarate | [93]                   |
| <i>Anaerosinus</i>          | <i>glycinii</i>           | DSM 5192    | 30               |     | glycerol               | [94]                   |
| <i>Anaerovibrio</i>         | <i>lipolytica</i>         | L 1342      |                  |     | glycerol               | [95]                   |
| <i>Anaerovibrio</i>         | <i>lipolytica</i>         | L 1641      |                  |     | glycerol               | [95]                   |
| <i>Anaerovibrio</i>         | <i>lipolytica</i>         | L 1741      |                  |     | glycerol               | [95]                   |
| <i>Bacillus</i>             | <i>licheniformis</i>      | JK1         | 38-40            | 6   | wheat grain slurry     | [96]                   |
| <i>Bacillus</i>             | <i>licheniformis</i>      | JK1         | 38-40            | 7   | wheat grain slurry     | [96]                   |
| <i>Bacillus</i>             | <i>licheniformis</i>      | JK1         | 38-40            | 8   | wheat grain slurry     | [96]                   |
| <i>Bacillus</i>             | <i>subtilis</i>           | VC2         | 37               | 7   | wheat grains           | [97]                   |
| <i>Bacillus</i>             | <i>licheniformis</i>      | JK1         | 37               | 7   | wheat grains           | [97]                   |
| <i>Bacteroides</i>          | <i>eggerthii</i>          | ATCC 27754  | 37               | 7.0 | glucose                | [98]                   |
| <i>Bacteroides</i>          | <i>fragilis</i>           | ATCC 25285  | 37               | 7.0 | glucose                | [98]                   |
| <i>Caldicellulosiruptor</i> | <i>acetigenus</i>         | DSM 7040    | 65-68            | 7.0 | glucose                | [99]                   |
| <i>Caldicellulosiruptor</i> | <i>kristjanssonii</i>     | DSM 12137   | 78               | 7.0 | cellobiose             | [100]                  |
| <i>Caldicellulosiruptor</i> | <i>owensensis</i>         | ATCC 700167 | 75               | 7.5 | glucose                | [101]                  |
| <i>Caldicellulosiruptor</i> | <i>saccharolyticus</i>    | DSM 8903    | 70               |     | glucose                | [48]                   |
| <i>Caldicellulosiruptor</i> | <i>saccharolyticus</i>    | DSM 8903    | 70               |     | glucose/filter paper   | [48]                   |
| <i>Caldicellulosiruptor</i> | <i>saccharolyticus</i>    | DSM 8903    | 70               |     | fructose               | [48]                   |
| <i>Caldicellulosiruptor</i> | <i>saccharolyticus</i>    | DSM 8903    | 70               |     | fructose/filter paper  | [48]                   |
| <i>Caldicellulosiruptor</i> | <i>saccharolyticus</i>    | DSM 8903    | 55               |     | corn leaves            | [48]                   |
| <i>Caldicellulosiruptor</i> | <i>saccharolyticus</i>    | DSM 8903    | 70               |     | sucrose                | [102]                  |

|                             |                        |            |       |         |                               |       |
|-----------------------------|------------------------|------------|-------|---------|-------------------------------|-------|
| <i>Caldicellulosiruptor</i> | <i>saccharolyticus</i> | DSM 8903   | 70    | 7.0     | barley straw                  | [103] |
| <i>Caldicellulosiruptor</i> | <i>saccharolyticus</i> | DSM 8903   | 70    | 7.0     | corn stalk                    | [103] |
| <i>Caldicellulosiruptor</i> | <i>saccharolyticus</i> | DSM 8903   | 70    | 7.0     | barley grains                 | [103] |
| <i>Caldicellulosiruptor</i> | <i>saccharolyticus</i> | DSM 8903   | 70    | 7.0     | corn grains                   | [103] |
| <i>Caldicellulosiruptor</i> | <i>saccharolyticus</i> | DSM 8903   | 70    | 7.0     | sugar beet roots              | [103] |
| <i>Caldicellulosiruptor</i> | <i>saccharolyticus</i> | DSM 8903   | 70    | 7.2     | paper sludge hydrolysate      | [104] |
| <i>Citrobacter</i>          | <i>freundii</i>        | TIT0101    | 30    | 7       | glucose                       | [105] |
| <i>Clostridium</i>          | <i>acetobutylicum</i>  | ATCC 39236 | 34-46 |         | Maltrin                       | [106] |
| <i>Clostridium</i>          | <i>acidtolerans</i>    | DSM 17425  |       | 6.0     |                               | [107] |
| <i>Clostridium</i>          | <i>aldrichii</i>       | ATCC 49358 | 35    | 7       | cellobiose                    | [108] |
| <i>Clostridium</i>          | <i>algoriphilum</i>    | DSM 16153  | 6     | 6.8-7.2 | glucose                       | [109] |
| <i>Clostridium</i>          | <i>amygdalinum</i>     | C9         | 37    | 7.5     | xylan                         | [110] |
| <i>Clostridium</i>          | <i>amygdalinum</i>     | C9         | 37    | 7.5     | starch                        | [110] |
| <i>Clostridium</i>          | <i>beijerinckii</i>    | ATCC 51743 | 37    | 6.0     | anthraquinone-2.6-disulfonate | [111] |
| <i>Clostridium</i>          | <i>beijerinckii</i>    | ATCC 51743 | 37    | 6.0     | humic acids                   | [111] |
| <i>Clostridium</i>          | <i>beijerinckii</i>    | DSM 791    |       | 6.0     |                               | [107] |
| <i>Clostridium</i>          | <i>beijerinckii</i>    | Fanp3      | 36    | 6.5     | CMC                           | [82]  |
| <i>Clostridium</i>          | <i>beijerinckii</i>    | Fanp3      | 36    | 6.5     | soluble starch                | [82]  |
| <i>Clostridium</i>          | <i>beijerinckii</i>    | Fanp3      | 36    | 6.5     | cellulose                     | [82]  |
| <i>Clostridium</i>          | <i>bifermentans</i>    |            | 35    | 6.2     | waste sludge                  | [112] |
| <i>Clostridium</i>          | <i>bifermentans</i>    |            | 35    | 6.4     | wastewater sludge             | [113] |
| <i>Clostridium</i>          | <i>butyricum</i>       | AS1.209    | 35    | 7.2     | steam exploded corn straw     | [114] |
| <i>Clostridium</i>          | <i>butyricum</i>       | AS1.209    | 35    | 7.2     | raw corn straw                | [114] |
| <i>Clostridium</i>          | <i>butyricum</i>       | CGS2       | 37    | 7.5     | cellulose                     | [80]  |
| <i>Clostridium</i>          | <i>butyricum</i>       | CGS5       | 37    | 7.5     | sucrose                       | [115] |
| <i>Clostridium</i>          | <i>butyricum</i>       | CGS5       | 37    | 7.2     | sucrose                       | [116] |
| <i>Clostridium</i>          | <i>butyricum</i>       | CGS5       | 37    | 7.5     | xylan                         | [117] |
| <i>Clostridium</i>          | <i>butyricum</i>       | CGS5       | 37    | 7.5     | sugarcane bagasse hydrolysate | [117] |
| <i>Clostridium</i>          | <i>butyricum</i>       | DSM 10702  |       | 6.0     |                               | [107] |

|                    |                        |             |       |         |                                    |       |
|--------------------|------------------------|-------------|-------|---------|------------------------------------|-------|
| <i>Clostridium</i> | <i>butyricum</i>       | DSM 5431    | 33    | 7.0     | glycerol                           | [118] |
| <i>Clostridium</i> | <i>butyricum</i>       | IFO 3847    | 30    | 7.9     | glutmate/lactate                   | [119] |
| <i>Clostridium</i> | <i>butyricum</i>       | IFO 3847    | 37    | 7.7     | glucose                            | [120] |
| <i>Clostridium</i> | <i>butyricum</i>       | IFO 3847    | 37    | 6.2     | wastewater                         | [121] |
| <i>Clostridium</i> | <i>butyricum</i>       | IFO 13949   | 36    | 6.5     | starch                             | [122] |
| <i>Clostridium</i> | <i>butyricum</i>       | LMG 77-11   | 30    | 6.0     | glucose                            | [123] |
| <i>Clostridium</i> | <i>butyricum</i>       | LMG 1212 t2 | 37    | 6.8     | glycerol                           | [124] |
| <i>Clostridium</i> | <i>butyricum</i>       | LMG 1212 t2 | 37    | 6.8     | glycerol/acetate                   | [124] |
| <i>Clostridium</i> | <i>butyricum</i>       | LMG 1213 t1 | 37    |         | mannitol                           | [125] |
| <i>Clostridium</i> | <i>butyricum</i>       | LMG 1213 t1 | 37    |         | mannitol/acetate                   | [125] |
| <i>Clostridium</i> | <i>butyricum</i>       | LMG 1213 t1 | 37    |         | mannitol/butyrate                  | [125] |
| <i>Clostridium</i> | <i>butyricum</i>       | LMG 1213 t1 | 37    |         | mannitol/formate                   | [125] |
| <i>Clostridium</i> | <i>butyricum</i>       | LMG 1213 t1 | 37    |         | mannitol/fumarate                  | [125] |
| <i>Clostridium</i> | <i>butyricum</i>       | LMG 1213 t1 | 37    |         | mannitol/dihydroacetone            | [125] |
| <i>Clostridium</i> | <i>butyricum</i>       | LMG 1213 t1 | 37    |         | mannitol/pyruvate                  | [125] |
| <i>Clostridium</i> | <i>butyricum</i>       | LMG 1213 t1 | 37    |         | mannitol/glucose                   | [125] |
| <i>Clostridium</i> | <i>butyricum</i>       | NCIB 9576   | 37    |         | starch                             | [126] |
| <i>Clostridium</i> | <i>butyricum</i>       | NCIB 9576   | 37    |         | algal biomass                      | [126] |
| <i>Clostridium</i> | <i>butyricum</i>       | NCIB 9576   | 37    |         | commercial <i>Chlorella</i> powder | [126] |
| <i>Clostridium</i> | <i>caminithermale</i>  | DSM 15212   | 45    | 6.6     | glucose                            | [127] |
| <i>Clostridium</i> | <i>cellobioparus</i>   |             | 38    | 7.4     | glucose                            | [128] |
| <i>Clostridium</i> | <i>cellobioparus</i>   |             | 38    | 7.4     | cellulose                          | [128] |
| <i>Clostridium</i> | <i>cellulolyticum</i>  | ATCC 35319  | 34    | 7.8     | cellulose                          | [129] |
| <i>Clostridium</i> | <i>diolis</i>          | DSM 15410   |       | 6.0     |                                    | [107] |
| <i>Clostridium</i> | <i>homopropionicum</i> | LuHBu1      | 37    | 7.2     | pyruvate                           | [130] |
| <i>Clostridium</i> | <i>hungatei</i>        | B3B         | 30    | 7.2     | cellulose                          | [131] |
| <i>Clostridium</i> | <i>kluveri</i>         |             | 33    | 7.4-7.5 | ethanol/acetate                    | [132] |
| <i>Clostridium</i> | <i>kluveri</i>         |             | 33    | 7.4-7.5 | crotonate                          | [132] |
| <i>Clostridium</i> | <i>longisporum</i>     | B6405       | 35-45 |         | alfalfa cell walls                 | [133] |

|                    |                                 |             |       |     |                    |       |
|--------------------|---------------------------------|-------------|-------|-----|--------------------|-------|
| <i>Clostridium</i> | <i>longisporum</i>              | OC4         | 35-45 |     | alfalfa cell walls | [133] |
| <i>Clostridium</i> | <i>lortetti</i>                 | ATCC 35059  | 37    | 6.5 | glucose            | [134] |
| <i>Clostridium</i> | <i>ludense</i>                  | DSM 17049   |       | 6.0 |                    | [107] |
| <i>Clostridium</i> | <i>methoxybenzovorans</i>       | DSM 12182   | 37    | 7.4 | sucrose            | [135] |
| <i>Clostridium</i> | <i>methylpentosum</i>           | ATCC 43829  | 37    | 6.5 | glucose            | [136] |
| <i>Clostridium</i> | <i>pasteurianum</i>             | CH1         | 37    | 7.5 | cellulose          | [80]  |
| <i>Clostridium</i> | <i>pasteurianum</i>             | CH4         | 37    | 7.5 | cellulose          | [80]  |
| <i>Clostridium</i> | <i>pasteurianum</i>             | CH5         | 37    | 7.5 | cellulose          | [80]  |
| <i>Clostridium</i> | <i>pasteurianum</i>             | CH7         | 37    | 7.5 | cellulose          | [80]  |
| <i>Clostridium</i> | <i>pasteurianum</i>             | DSM 525     |       | 6.0 |                    | [107] |
| <i>Clostridium</i> | <i>pasteurianum</i>             | LMG 8285    | 37    | 6.8 | glycerol           | [124] |
| <i>Clostridium</i> | <i>pasteurianum</i>             | LMG 8285    | 37    | 6.8 | glycerol/acetate   | [124] |
| <i>Clostridium</i> | <i>peptidivorans</i>            | DSM 12505   | 37    | 7   | isoleucine         | [137] |
| <i>Clostridium</i> | <i>peptidivorans</i>            | DSM 12505   | 37    | 7   | serine             | [137] |
| <i>Clostridium</i> | <i>peptidivorans</i>            | DSM 12505   | 37    | 7   | casamino acid      | [137] |
| <i>Clostridium</i> | <i>phytofermentans</i>          | ATCC 700394 | 37    | 7   | cellulose          | [138] |
| <i>Clostridium</i> | <i>phytofermentans</i>          | ATCC 700394 | 37    | 7   | cellobiose         | [138] |
| <i>Clostridium</i> | <i>puniceum</i>                 | DSM 2619    |       | 6.0 |                    | [107] |
| <i>Clostridium</i> | <i>saccharoperbutylaceticum</i> | DSM 14923   |       | 6.0 |                    | [107] |
| <i>Clostridium</i> | sp.                             | A22         | 34    | 7.8 | cellulose          | [129] |
| <i>Clostridium</i> | sp.                             | BL-17       |       | 6.0 |                    | [107] |
| <i>Clostridium</i> | sp.                             | BL-20       |       | 6.0 |                    | [107] |
| <i>Clostridium</i> | sp.                             | BL-21       |       | 6.0 |                    | [107] |
| <i>Clostridium</i> | sp.                             | BL-22       |       | 6.0 |                    | [107] |
| <i>Clostridium</i> | sp.                             | BL-26       |       | 6.0 |                    | [107] |
| <i>Clostridium</i> | sp.                             | BL-28       |       | 6.0 |                    | [107] |
| <i>Clostridium</i> | sp.                             | BL-3        |       | 6.0 |                    | [107] |
| <i>Clostridium</i> | sp.                             | BL-3        |       | 7.2 |                    | [107] |
| <i>Clostridium</i> | sp.                             | BL-30       |       | 6.0 |                    | [107] |

|                    |                              |            |    |         |                   |            |
|--------------------|------------------------------|------------|----|---------|-------------------|------------|
| <i>Clostridium</i> | sp.                          | BL-8       |    | 6.0     |                   | [107]      |
| <i>Clostridium</i> | sp.                          | EG3        | 37 | 6.8-7.2 | glucose           | [139]      |
| <i>Clostridium</i> | <i>thermocellum</i>          | AS-39      | 60 | 7.3     | cellulose         | [140]      |
| <i>Clostridium</i> | <i>thermocellum</i>          | AS-39      | 60 | 7.3     | cellobiose        | [140]      |
| <i>Clostridium</i> | <i>thermocellum</i>          | AS-39      | 60 | 7.3     | cellulose         | [140]      |
| <i>Clostridium</i> | <i>thermocellum</i>          | AS-39      | 60 | 7.3     | cellobiose        | [140]      |
| <i>Clostridium</i> | <i>thermocellum</i>          | DMS 123    | 55 |         | tissue paper      | [141]      |
| <i>Clostridium</i> | <i>thermocellum</i>          | DMS 123    | 55 |         | tissue paper      | [141]      |
| <i>Clostridium</i> | <i>thermocellum</i>          | DMS 123    | 55 |         | tissue paper      | [141]      |
| <i>Clostridium</i> | <i>thermocellum</i>          | JN4        | 60 |         | corn stalk powder | [142]      |
| <i>Clostridium</i> | <i>thermocellum</i>          | JN4        | 60 |         | corn cob powder   | [142]      |
| <i>Clostridium</i> | <i>thermocellum</i>          | JN4        | 60 |         | corn stalk powder | [142]      |
| <i>Clostridium</i> | <i>thermocellum</i>          | JN4        | 60 |         | corn cob powder   | [142]      |
| <i>Clostridium</i> | <i>thermocellum</i>          | JW20       | 60 |         | cellobiose        | [143]      |
| <i>Clostridium</i> | <i>thermocellum</i>          | LQRI       | 60 |         | glucose           | [144]      |
| <i>Clostridium</i> | <i>thermocellum</i>          | LQRI       | 60 |         | cellobiose        | [144]      |
| <i>Clostridium</i> | <i>thermocellum</i>          | LQRI       | 60 | 7.3     | cellulose         | [140, 144] |
| <i>Clostridium</i> | <i>thermocellum</i>          | LQRI       | 60 | 7.3     | cellobiose        | [140]      |
| <i>Clostridium</i> | <i>thermocellum</i>          | YS         | 60 | 7.3     | cellulose         | [140]      |
| <i>Clostridium</i> | <i>thermocellum</i>          | YS         | 60 | 7.3     | cellobiose        | [140]      |
| <i>Clostridium</i> | <i>thermohydrosulfuricum</i> | E100-69    | 70 |         | glucose           | [145]      |
| <i>Clostridium</i> | <i>thermohydrosulfuricum</i> | E39        | 65 |         | xylose            | [144]      |
| <i>Clostridium</i> | <i>thermohydrosulfuricum</i> | E39        | 65 |         | glucose           | [144]      |
| <i>Clostridium</i> | <i>thermohydrosulfuricum</i> | E39        | 65 |         | cellobiose        | [144]      |
| <i>Clostridium</i> | <i>thermohydrosulfuricum</i> | JW102      | 70 |         | glucose           | [145]      |
| <i>Clostridium</i> | <i>thiosulfatireducens</i>   | DSM 13105  |    | 7.2     |                   | [107]      |
| <i>Clostridium</i> | <i>tryobutyricum</i>         | ATCC 25755 | 37 | 5.3     | xylose            | [146]      |
| <i>Clostridium</i> | <i>tryobutyricum</i>         | ATCC 25755 | 37 | 6.3     | xylose            | [146]      |
| <i>Clostridium</i> | <i>xylanovorans</i>          | DSM 12503  | 37 |         | glucose           | [147]      |

|                          |                      |                                              |    |       |                 |        |
|--------------------------|----------------------|----------------------------------------------|----|-------|-----------------|--------|
| <i>Coprothermobacter</i> | <i>platensis</i>     | DSM 11748                                    | 55 | 7.0   | gelatin         | [148]  |
| <i>Coprothermobacter</i> | <i>proteolyticus</i> | DSM 5265                                     | 63 | 7.5   | glucose         | [148]  |
| <i>Desulfovibrio</i>     | <i>vulgaris</i>      | Madison                                      | 30 |       | pyruvate        | [149]  |
| <i>Desulfovibrio</i>     | <i>vulgaris</i>      | Madison                                      | 30 |       | lactate         | [149]  |
| <i>Desulfovibrio</i>     | <i>vulgaris</i>      | H801                                         | 28 |       | lactate         | [150]  |
| <i>Desulfovibrio</i>     | <i>vulgaris</i>      | H801                                         | 28 |       | pyruvate        | [150]  |
| <i>Desulfovibrio</i>     | <i>vulgaris</i>      | Hyd100                                       | 28 |       | lactate         | [150]  |
| <i>Desulfovibrio</i>     | <i>vulgaris</i>      | NCIMB 8303                                   | 28 |       | lactate         | [150]  |
| <i>Dethiosulfovibrio</i> | <i>marinus</i>       | DSM 12537                                    | 28 | 6.5-7 | glucose         | [151]  |
| <i>Dethiosulfovibrio</i> | <i>russensis</i>     | DSM 12538                                    | 28 | 6.5-7 | glucose         | [151]  |
| <i>Escherichia</i>       | <i>coli</i>          | AN346                                        | 37 | 7.4   | glucose         | [152]  |
| <i>Escherichia</i>       | <i>coli</i>          | AN817                                        | 37 | 7.4   | glucose         | [152]  |
| <i>Escherichia</i>       | <i>coli</i>          | B1LK0                                        | 30 | 7.3   | glucose         | [153]  |
| <i>Escherichia</i>       | <i>coli</i>          | BL21(DE3) $\Delta$ tonA                      | 37 |       | glucose         | [154]  |
| <i>Escherichia</i>       | <i>coli</i>          | BL21(DE3)pSynhox $\Delta$ H <sub>2</sub> ase | 37 |       | glucose         | [155]  |
| <i>Escherichia</i>       | <i>coli</i>          | C600                                         | 30 | 7     | glucose         | [105]  |
| <i>Escherichia</i>       | <i>coli</i>          | C600                                         | 30 | 7     | glucose         | [105]  |
| <i>Escherichia</i>       | <i>coli</i>          | CECT 99                                      | 25 |       | glucose         | [156]  |
| <i>Escherichia</i>       | <i>coli</i>          | communis                                     | 37 | 6     | formate         | [157]  |
| <i>Escherichia</i>       | <i>coli</i>          | communis                                     |    |       | glucose         | [3, 4] |
| <i>Escherichia</i>       | <i>coli</i>          | communis                                     |    |       | mannitol        | [3]    |
| <i>Escherichia</i>       | <i>coli</i>          | communis                                     |    |       | fructose        | [3]    |
| <i>Escherichia</i>       | <i>coli</i>          | communis                                     |    |       | galactose       | [3]    |
| <i>Escherichia</i>       | <i>coli</i>          | communis                                     |    |       | arabinose       | [3]    |
| <i>Escherichia</i>       | <i>coli</i>          | communis                                     |    |       | glucose/formate | [4]    |
| <i>Escherichia</i>       | <i>coli</i>          | DADE                                         | 30 | 7.3   | glucose         | [153]  |
| <i>Escherichia</i>       | <i>coli</i>          | FM420                                        | 37 | 7.4   | glucose         | [152]  |
| <i>Escherichia</i>       | <i>coli</i>          | FM911                                        | 37 | 7.5   | glucose         | [158]  |
| <i>Escherichia</i>       | <i>coli</i>          | FM911                                        | 37 | 5.5   | glucose/formate | [158]  |

|                    |             |             |    |     |                 |       |
|--------------------|-------------|-------------|----|-----|-----------------|-------|
| <i>Escherichia</i> | <i>coli</i> | FRAG115     | 37 | 7.5 | glucose         | [158] |
| <i>Escherichia</i> | <i>coli</i> | FRAG115     | 37 | 7.5 | glucose/formate | [158] |
| <i>Escherichia</i> | <i>coli</i> | FRAG115     | 37 | 5.5 | glucose/formate | [158] |
| <i>Escherichia</i> | <i>coli</i> | FRAG90      |    | 6.5 |                 | [159] |
| <i>Escherichia</i> | <i>coli</i> | FRAG90      |    | 7.5 |                 | [159] |
| <i>Escherichia</i> | <i>coli</i> | FRAG90      | 37 | 7.4 | glucose         | [152] |
| <i>Escherichia</i> | <i>coli</i> | FTD701      | 30 | 7.3 | glucose         | [153] |
| <i>Escherichia</i> | <i>coli</i> | HD700       | 37 | 7.5 | glucose         | [158] |
| <i>Escherichia</i> | <i>coli</i> | HD700       | 37 | 5.5 | glucose         | [158] |
| <i>Escherichia</i> | <i>coli</i> | HD700       | 37 | 7.5 | glucose/formate | [158] |
| <i>Escherichia</i> | <i>coli</i> | HD700       | 37 | 5.5 | glucose/formate | [158] |
| <i>Escherichia</i> | <i>coli</i> | HD701       | 30 | 7.3 | glucose         | [153] |
| <i>Escherichia</i> | <i>coli</i> | HD705       | 37 | 7.5 | glucose         | [158] |
| <i>Escherichia</i> | <i>coli</i> | HD705       | 37 | 5.5 | glucose         | [158] |
| <i>Escherichia</i> | <i>coli</i> | HD705       | 37 | 7.5 | glucose/formate | [158] |
| <i>Escherichia</i> | <i>coli</i> | HD705       | 37 | 5.5 | glucose/formate | [158] |
| <i>Escherichia</i> | <i>coli</i> | HD706       |    | 6.5 |                 | [159] |
| <i>Escherichia</i> | <i>coli</i> | HD706       |    | 7.5 |                 | [159] |
| <i>Escherichia</i> | <i>coli</i> | HD707       |    | 6.5 |                 | [159] |
| <i>Escherichia</i> | <i>coli</i> | HD707       |    | 7.5 |                 | [159] |
| <i>Escherichia</i> | <i>coli</i> | HK-8(pCBH4) | 30 | 7   | glucose         | [105] |
| <i>Escherichia</i> | <i>coli</i> | HK-8(pCBH4) | 30 | 7   | glucose         | [105] |
| <i>Escherichia</i> | <i>coli</i> | JRG3615     |    | 6.5 |                 | [159] |
| <i>Escherichia</i> | <i>coli</i> | JRG3615     |    | 7.5 |                 | [159] |
| <i>Escherichia</i> | <i>coli</i> | JRG3615     | 37 | 7.5 | glucose         | [158] |
| <i>Escherichia</i> | <i>coli</i> | JRG3615     | 37 | 5.5 | glucose         | [158] |
| <i>Escherichia</i> | <i>coli</i> | JRG3615     | 37 | 7.5 | glucose/formate | [158] |
| <i>Escherichia</i> | <i>coli</i> | JRG3615     | 37 | 5.5 | glucose/formate | [158] |
| <i>Escherichia</i> | <i>coli</i> | JRG3618     |    | 6.5 |                 | [159] |

|                         |                    |              |       |         |                 |       |
|-------------------------|--------------------|--------------|-------|---------|-----------------|-------|
| <i>Escherichia</i>      | <i>coli</i>        | JRG3618      |       | 6.5     |                 | [159] |
| <i>Escherichia</i>      | <i>coli</i>        | JRG3618      |       | 7.5     |                 | [159] |
| <i>Escherichia</i>      | <i>coli</i>        | JRG3621      |       | 6.5     |                 | [159] |
| <i>Escherichia</i>      | <i>coli</i>        | JRG3621      |       | 6.5     |                 | [159] |
| <i>Escherichia</i>      | <i>coli</i>        | JRG3621      |       | 7.5     |                 | [159] |
| <i>Escherichia</i>      | <i>coli</i>        | JRG3933      | 37    | 7.5     | glucose         | [158] |
| <i>Escherichia</i>      | <i>coli</i>        | JRG3933      | 37    | 5.5     | glucose         | [158] |
| <i>Escherichia</i>      | <i>coli</i>        | JRG3933      | 37    | 7.5     | glucose/formate | [158] |
| <i>Escherichia</i>      | <i>coli</i>        | JRG3933      | 37    | 5.5     | glucose/formate | [158] |
| <i>Escherichia</i>      | <i>coli</i>        | K12 (lambda) | 37    | 7.3-7.4 | glucose         | [160] |
| <i>Escherichia</i>      | <i>coli</i>        | K12 (lambda) | 37    | 7.3-7.4 | maltose         | [160] |
| <i>Escherichia</i>      | <i>coli</i>        | MC4100       |       | 6.5     |                 | [159] |
| <i>Escherichia</i>      | <i>coli</i>        | MC4100       |       | 7.5     |                 | [159] |
| <i>Escherichia</i>      | <i>coli</i>        | MC4100       | 37    | 7.4     | glucose         | [152] |
| <i>Escherichia</i>      | <i>coli</i>        | MC4100       | 30    | 7.3     | glucose         | [153] |
| <i>Escherichia</i>      | <i>coli</i>        | MC4100       | 37    | 7.5     | glucose         | [158] |
| <i>Escherichia</i>      | <i>coli</i>        | MC4100       | 37    | 5.5     | glucose         | [158] |
| <i>Escherichia</i>      | <i>coli</i>        | MC4100       | 37    | 7.5     | glucose/formate | [158] |
| <i>Escherichia</i>      | <i>coli</i>        | MC4100       | 37    | 5.5     | glucose/formate | [158] |
| <i>Escherichia</i>      | <i>coli</i>        | S13          | 37    | 7.2     | formate         | [161] |
| <i>Escherichia</i>      | <i>coli</i>        | S13          | 37    | 7.2     | formate         | [161] |
| <i>Escherichia</i>      | <i>coli</i>        | S13          | 37    | 7.2     | glucose         | [161] |
| <i>Escherichia</i>      | <i>coli</i>        | TG1          | 37    |         |                 | [67]  |
| <i>Escherichia</i>      | <i>coli</i>        | TK2242       | 37    | 7.4     | glucose         | [162] |
| <i>Enterobacter</i>     | <i>aerogenes</i>   | HO-39        | 36    | 6.5     | starch          | [122] |
| <i>Ethanoligenens</i>   | <i>harbinense</i>  | JCM12961     | 35    | 4.5-5.0 | glucose         | [163] |
| <i>Ethanoligenens</i>   | <i>harbinense</i>  | X-29         | 35    | 4.5-5.0 | glucose         | [163] |
| <i>Fervidobacterium</i> | <i>gondwanense</i> | ACM 5017     | 65-68 | 6.8     | glucose         | [164] |
| <i>Fervidobacterium</i> | <i>pennavorans</i> | DSM 9078     | 65    |         |                 | [165] |



|                          |                         |                   |      |         |                              |       |
|--------------------------|-------------------------|-------------------|------|---------|------------------------------|-------|
| <i>Geobacter</i>         | <i>hydrogenophilus</i>  | H-2               | 30   |         | acetate                      | [166] |
| <i>Geobacter</i>         | <i>hydrogenophilus</i>  | H-2               | 30   |         | butyrate                     | [166] |
| <i>Geobacter</i>         | <i>hydrogenophilus</i>  | H-2               | 30   |         | benzoate                     | [166] |
| <i>Geobacter</i>         | <i>hydrogenophilus</i>  | H-2               | 30   |         | ethanol                      | [166] |
| <i>Geobacter</i>         | <i>metallireducens</i>  | GS15              | 30   |         | acetate                      | [166] |
| <i>Gluconacetobacter</i> | <i>diazotrophicus</i>   | ATCC 49037        | 30   | 7.4     | glucose                      | [167] |
| <i>Gluconacetobacter</i> | <i>diazotrophicus</i>   | T2                | 30   | 7.4     | glucose                      | [167] |
| <i>Hafnia</i>            | <i>alvei</i>            | CECT 400          | 39   |         | glucose                      | [156] |
| <i>Haloanaerobium</i>    | <i>hydrogeniformans</i> |                   | 33   | 11      |                              | [168] |
| <i>Haloanaerobium</i>    | <i>lacusroseus</i>      | DSM 10165         | 40   | 7.0     | glucose                      | [169] |
| <i>Halobaculum</i>       | <i>saccharolytica</i>   | DSM 7379          | 40   | 7.0     | glucose                      | [170] |
| <i>Halonatronum</i>      | <i>saccharophilum</i>   | DSM 13868         |      |         | glucose                      | [91]  |
| <i>Halotheothrix</i>     | <i>orenia</i>           | H168              | 60   | 6.5-7.0 | glucose                      | [171] |
| <i>Ilyobacter</i>        | <i>insuetus</i>         | DSM 6831          | 30   | 6.5-8.0 | quinic acid or shikimic acid | [172] |
| <i>Klebsiella</i>        | <i>oxytoca</i>          | HP1               | 37.5 | 7.0     | hydrolyzed bagasse           | [173] |
| <i>Klebsiella</i>        | <i>oxytoca</i>          | HP1 $\Delta$ ahdE | 37.5 | 7.0     | hydrolyzed bagasse           | [173] |
| <i>Klebsiella</i>        | <i>pneumoniae</i>       | ECU-15            |      |         | glucose                      | [174] |
| <i>Pantoea</i>           | sp.                     | C9                | 30   | 7.4     | glucose                      | [167] |
| <i>Pelobacter</i>        | <i>carbinolicus</i>     | DSM 2380          | 35   | 6.5-7.2 | butanediol                   | [175] |
| <i>Pelobacter</i>        | <i>carbinolicus</i>     | DSM 2380          | 35   | 6.5-7.2 | ethanol                      | [175] |
| <i>Petrogona</i>         | <i>miotherma</i>        | DSM 10691         | 55   |         | DSM 718                      | [165] |
| <i>Pseudomonas</i>       | sp.                     | GZ1               | 35   |         | wastewater sludge            | [176] |
| <i>Roseburia</i>         | <i>intestinalis</i>     | XB6B4             | 37   |         |                              | [177] |
| <i>Ruminococcus</i>      | <i>albus</i>            | 43-1              | 39   |         | cellulose                    | [178] |
| <i>Ruminococcus</i>      | <i>albus</i>            | 46-1              | 39   |         | cellulose                    | [178] |
| <i>Ruminococcus</i>      | <i>albus</i>            | 56-2              | 39   |         | cellulose                    | [178] |
| <i>Ruminococcus</i>      | <i>albus</i>            | 69                | 39   |         | cellulose                    | [178] |
| <i>Ruminococcus</i>      | <i>flavefaciens</i>     | 61-1              | 39   |         | cellulose                    | [178] |
| <i>Ruminococcus</i>      | <i>flavefaciens</i>     | S1-2              | 39   |         | cellulose                    | [178] |

|                     |                        |          |    |         |               |       |
|---------------------|------------------------|----------|----|---------|---------------|-------|
| <i>Ruminococcus</i> | <i>flavefaciens</i>    | S1-y     | 39 |         | cellulose     | [178] |
| <i>Ruminococcus</i> | sp.                    | 19.08.6C | 38 |         | cellobiose    | [179] |
| <i>Ruminococcus</i> | sp.                    | 20       | 38 |         | cellobiose    | [179] |
| <i>Ruminococcus</i> | sp.                    | 21.09.6A | 38 |         | cellobiose    | [179] |
| <i>Ruminococcus</i> | sp.                    | 21.09.6B | 38 |         | cellobiose    | [179] |
| <i>Ruminococcus</i> | sp.                    | 21.09.6E | 38 |         | cellobiose    | [179] |
| <i>Ruminococcus</i> | sp.                    | 21.09.6F | 38 |         | cellobiose    | [179] |
| <i>Ruminococcus</i> | sp.                    | 21.09.6G | 38 |         | cellobiose    | [179] |
| <i>Ruminococcus</i> | sp.                    | 22.08.6A | 38 |         | cellobiose    | [179] |
| <i>Ruminococcus</i> | sp.                    | 22.08.6B | 38 |         | cellobiose    | [179] |
| <i>Ruminococcus</i> | sp.                    | 22.08.6F | 38 |         | cellobiose    | [179] |
| <i>Ruminococcus</i> | sp.                    | 7        | 38 |         | cellobiose    | [179] |
| <i>Ruminococcus</i> | sp.                    | c94      | 38 |         | cellobiose    | [179] |
| <i>Ruminococcus</i> | sp.                    | FD1      | 38 |         | cellobiose    | [179] |
| <i>Sarcina</i>      | <i>ventriculi</i>      | JK       |    | 2-9     | glucose       | [180] |
| <i>Selenomonas</i>  | <i>acidaminovorans</i> | DSM 6589 | 55 | 6.5-8.1 | glutamate     | [181] |
| <i>Selenomonas</i>  | <i>acidaminovorans</i> | DSM 6589 | 55 | 6.5-8.1 | ketoglutarate | [181] |
| <i>Selenomonas</i>  | <i>acidaminovorans</i> | DSM 6589 | 55 | 6.5-8.1 | histidine     | [181] |
| <i>Selenomonas</i>  | <i>acidaminovorans</i> | DSM 6589 | 55 | 6.5-8.1 | arginine      | [181] |
| <i>Selenomonas</i>  | <i>acidaminovorans</i> | DSM 6589 | 55 | 6.5-8.1 | ornithine     | [181] |
| <i>Selenomonas</i>  | <i>acidaminovorans</i> | DSM 6589 | 55 | 6.5-8.1 | glucose       | [181] |
| <i>Selenomonas</i>  | <i>acidaminovorans</i> | DSM 6589 | 55 | 6.5-8.1 | fructose      | [181] |
| <i>Selenomonas</i>  | <i>acidaminovorans</i> | DSM 6589 | 55 | 6.5-8.1 | alanine       | [181] |
| <i>Selenomonas</i>  | <i>acidaminovorans</i> | DSM 6589 | 55 | 6.5-8.1 | serine        | [181] |
| <i>Selenomonas</i>  | <i>acidaminovorans</i> | DSM 6589 | 55 | 6.5-8.1 | pyruvate      | [181] |
| <i>Selenomonas</i>  | <i>acidaminovorans</i> | DSM 6589 | 55 | 6.5-8.1 | glycerol      | [181] |
| <i>Selenomonas</i>  | <i>acidaminovorans</i> | DSM 6589 | 55 | 6.5-8.1 | citrate       | [181] |
| <i>Selenomonas</i>  | <i>acidaminovorans</i> | DSM 6589 | 55 | 6.5-8.1 | isoleucine    | [181] |
| <i>Selenomonas</i>  | <i>acidaminovorans</i> | DSM 6589 | 55 | 6.5-8.1 | valine        | [181] |

|                              |                              |           |       |         |                  |            |
|------------------------------|------------------------------|-----------|-------|---------|------------------|------------|
| <i>Selenomonas</i>           | <i>acidaminovorans</i>       | DSM 6589  | 55    | 6.5-8.1 | leucine          | [181]      |
| <i>Selenomonas</i>           | <i>ruminantium</i>           | GA192     | 37    |         | glucose          | [182]      |
| <i>Selenomonas</i>           | <i>ruminantium</i>           | HD4       | 37    |         | glucose          | [183]      |
| <i>Shewanella</i>            | <i>alga</i>                  | BRY       | 20    |         | lactate          | [166]      |
| <i>Shewanella</i>            | <i>palmitatis</i>            | SDBY      | 37    |         | lactate          | [166]      |
| <i>Spirochaeta</i>           | <i>aurantia</i>              | J1        | 30    | 7.5     | maltose          | [184]      |
| <i>Syntrophothermus</i>      | <i>lipocalidus</i>           |           | 55    | 6.2     | butyrate         | [92]       |
| <i>Tepidibacter</i>          | <i>thalassicus</i>           | DSM 15285 | 50    | 6.5-6.8 | glucose          | [185]      |
| <i>Thermoanaerobacter</i>    | <i>brockii</i>               | DSM 1457  | 70    | 7.5     | glucose          | [186, 187] |
| <i>Thermoanaerobacter</i>    | <i>brockii</i>               | HDT1      | 65    |         | glucose          | [186]      |
| <i>Thermoanaerobacter</i>    | <i>brockii</i>               | HDT6      | 65    |         | glucose          | [186]      |
| <i>Thermoanaerobacter</i>    | <i>brockii</i>               | DSM 9801  | 55-60 | 7.3     | glucose          | [188]      |
| <i>Thermoanaerobacter</i>    | <i>siderophilus</i>          | DSM 12299 | 69-71 | 6.3-6.5 | glucose          | [189]      |
| <i>Thermoanaerobacter</i>    | <i>thermohydrosulfuricus</i> | DSM 567   | 67-69 | 6.9-7.5 |                  | [187]      |
| <i>Thermoanaerobacterium</i> | <i>aciditolerans</i>         | DSM 16487 | 55    | 5.7     | sucrose          | [190]      |
| <i>Thermoanaerobacterium</i> | <i>polysaccharolyticum</i>   | DSM 13641 | 65-68 | 6.8-7.0 | glucose          | [191]      |
| <i>Thermoanaerobacterium</i> | <i>saccharolyticum</i>       | DSM 7060  | 60    | 6.0     | glucose          | [187]      |
| <i>Thermoanaerobacterium</i> | <i>saccharolyticum</i>       | DSM 7060  | 60    | 6.0     | xylan            | [187]      |
| <i>Thermoanaerobacterium</i> | <i>saccharolyticum</i>       | DSM 7060  | 60    | 6.0     | rhamnose         | [187]      |
| <i>Thermoanaerobacterium</i> | <i>thermosulfurigenes</i>    | DSM 2229  | 60    | 5.5-6.5 | glucose          | [187]      |
| <i>Thermoanaerobacterium</i> | <i>xylanolyticum</i>         | DSM 7097  | 60    | 6.0     |                  | [187]      |
| <i>Thermoanaerobacterium</i> | <i>zeae</i>                  | DSM 13642 | 65-70 | 3.9-7.9 | glucose          | [191]      |
| <i>Thermoanaerobium</i>      | <i>brockii</i>               | HTD4      | 65    |         | glucose          | [192]      |
| <i>Thermoanaerobium</i>      | <i>brockii</i>               | HTD4      | 65    |         | starch           | [192]      |
| <i>Thermoanaerobium</i>      | <i>brockii</i>               | HTD4      | 65    |         | acetone          | [192]      |
| <i>Thermoanaerobium</i>      | <i>brockii</i>               | HTD4      | 65    |         | glucose/acetone  | [192]      |
| <i>Thermoanaerobium</i>      | <i>brockii</i>               | HTD4      | 65    |         | pyruvate/acetone | [192]      |
| <i>Thermobrachium</i>        | <i>celere</i>                | DSM 8682  | 67    | 8.2     | glucose          | [193]      |
| <i>Thermobrachium</i>        | <i>celere</i>                | DSM 8682  | 67    | 8.2     | yeast extract    | [194]      |

|                               |                              |             |       |         |                              |            |
|-------------------------------|------------------------------|-------------|-------|---------|------------------------------|------------|
| <i>Thermobrachium</i>         | <i>celere</i>                | DSM 8682    | 67    | 8.2     | tryptone                     | [194]      |
| <i>Thermobrachium</i>         | <i>celere</i>                | DSM 8682    | 67    | 8.2     | glucose/yeast extract        | [194]      |
| <i>Thermobrachium</i>         | <i>celere</i>                | DSM 8682    | 67    | 8.2     | glucose/tryptone             | [194]      |
| <i>Thermococcus</i>           | sp.                          | ES-1        | 81    |         | yeast extract/tryptone       | [195]      |
| <i>Thermodesulfobacterium</i> | <i>commune</i>               | YSRA        | 60    |         | pyruvate                     | [149]      |
| <i>Thermodesulfobacterium</i> | <i>commune</i>               | YSRA        | 60    |         | lactate                      | [149]      |
| <i>Thermosipho</i>            | <i>africanus</i>             | DSM 5309    | 75    |         |                              | [165]      |
| <i>Thermotoga</i>             | <i>elfii</i>                 | DSM 9442    | 65    | 8       | glucose                      | [165, 196] |
| <i>Thermotoga</i>             | <i>elfii</i>                 | DSM 9442    | 65    | 8       | xylose/glucose               | [196]      |
| <i>Thermotoga</i>             | <i>elfii</i>                 | DSM 9442    | 65    | 7.2     | paper sludge hydrolysate     | [104]      |
| <i>Thermotoga</i>             | <i>lettingae</i>             | DSM 14385   | 65    | 7.0     | glucose                      | [197]      |
| <i>Thermotoga</i>             | <i>maritima</i>              | DSM 3109    | 80    | 6.5-7.0 | starch                       | [198]      |
| <i>Thermotoga</i>             | <i>maritima</i>              | DSM 3109    | 80    | 6.5-7.0 | cellulose                    | [198]      |
| <i>Thermotoga</i>             | <i>maritima</i>              | DSM 3109    | 80    | 6.5-7.0 | carboxymethyl cellulose      | [198]      |
| <i>Thermotoga</i>             | <i>neapolitana</i>           | ATCC 49049  | 70    |         |                              | [165]      |
| <i>Thermotoga</i>             | <i>neapolitana</i>           | DSM 4359    | 75    | 6.5-7.0 | starch                       | [198]      |
| <i>Thermotoga</i>             | <i>neapolitana</i>           | DSM 4359    | 75    | 6.5-7.0 | cellulose                    | [198]      |
| <i>Thermotoga</i>             | <i>neapolitana</i>           | DSM 4359    | 75    | 6.5-7.0 | carboxymethyl cellulose      | [198]      |
| <i>Thermovenabulum</i>        | <i>ferrorganovorum</i>       | DSM 14006   | 63-65 | 6.7-6.9 | melibiose                    | [199]      |
| <i>Vibrio</i>                 | <i>aerogenes</i>             | ATCC 700797 | 30    | 7       | glucose                      | [200]      |
|                               |                              | 66-1        | 39    |         | cellulose                    | [178]      |
|                               |                              | B2          | 37    |         | microcrystalline cellulose   | [201]      |
|                               |                              | C3          | 37    |         | microcrystalline cellulose   | [201]      |
|                               |                              | FMHBu1      | 28    | 7       | pyruvate                     | [130]      |
|                               |                              | Mfc52       | 30    | 6.7     | glucose                      | [202]      |
| <i>Escherichia</i>            | <i>coli</i>                  |             | 37    | 5.5     | glucose                      | [203]      |
| <i>Citrobacter</i>            | <i>freundii</i>              | ATCC 6750   |       |         |                              |            |
| <i>Escherichia</i>            | <i>coli</i>                  |             | 37    | 5.5     | filter paper                 | [203]      |
| <i>Citrobacter</i>            | <i>freundii</i>              | ATCC 6750   |       |         |                              |            |
| <i>Clostridium</i>            | <i>thermocellum</i>          | JN4         | 60    |         |                              |            |
| <i>Thermoanaerobacterium</i>  | <i>thermosaccharolyticum</i> | GD17        |       |         | 0.5% (w/v) corn stalk powder | [142]      |

|                                                    |                                                     |                      |    |     |                            |       |
|----------------------------------------------------|-----------------------------------------------------|----------------------|----|-----|----------------------------|-------|
| <i>Clostridium</i><br><i>Thermoanaerobacterium</i> | <i>thermocellum</i><br><i>thermosaccharolyticum</i> | JN4<br>GD17          | 60 |     | 0.5% (w/v) corn cob powder | [142] |
| <i>Clostridium</i><br><i>Thermoanaerobacterium</i> | <i>thermocellum</i><br><i>thermosaccharolyticum</i> | JN4<br>GD17          | 60 |     | 1% (w/v) corn stalk powder | [142] |
| <i>Clostridium</i><br><i>Thermoanaerobacterium</i> | <i>thermocellum</i><br><i>thermosaccharolyticum</i> | JN4<br>GD17          | 60 |     | 1% (w/v) corn cob powder   | [142] |
| <i>Clostridium</i><br><i>Clostridium</i>           | <i>thermocellum</i><br><i>thermopalmarium</i>       | DSM 1237<br>DSM 5974 | 55 | 7.0 | cellulose                  | [204] |
| <i>Clostridium</i><br><i>Enterobacter</i>          | <i>butyricum</i><br><i>aerogenes</i>                | IFO 13949<br>HO-39   | 36 | 6.5 | starch, argon gas          | [122] |
| <i>Clostridium</i><br><i>Enterobacter</i>          | <i>butyricum</i><br><i>aerogenes</i>                | IFO 13949<br>HO-39   | 36 | 6.5 | starch                     | [122] |

\* for reference please refer to manuscript
