# Supplementary material for: A comprehensive and quantitative review of dark fermentative biohydrogen production
Source: PubMed Central journal article supplement (PMC3443015; doi:10.1186/1475-2859-11-115), 2012-08-27
Supplement: 1475-2859-11-115-S2.pdf [file 1475-2859-11-115-S2.pdf]

**Additional file 2:** Closed batch dark fermentative biohydrogen production

| Genus                       | Species                | Strain     | $Y_{(H_2/S)}$<br>[mol mol <sup>-1</sup> ] | $q_{H_2}$<br>[mmol g <sup>-1</sup> h <sup>-1</sup> ] | HER<br>[mmol L <sup>-1</sup> h <sup>-1</sup> ] | Temperature<br>[°C] | pH  | Main substrate and<br>discriminative condition | Reference <sup>+</sup> |
|-----------------------------|------------------------|------------|-------------------------------------------|------------------------------------------------------|------------------------------------------------|---------------------|-----|------------------------------------------------|------------------------|
| <i>Acetobacterium</i>       | <i>woodii</i>          |            | 0.06                                      |                                                      |                                                |                     |     | fructose<br>(with Ni)                          | [205]                  |
| <i>Acetobacterium</i>       | <i>woodii</i>          |            | 2.94                                      |                                                      |                                                |                     |     | fructose<br>(without Ni)                       | [205]                  |
| <i>Acidaminococcus</i>      | <i>fermentans</i>      | AO         | 0.6                                       |                                                      |                                                | 39                  | 6.7 | trans-aconitate                                | [206]                  |
| <i>Acidaminococcus</i>      | <i>fermentans</i>      | AO         | 1                                         |                                                      |                                                | 39                  | 6.7 | citrate                                        | [206]                  |
| <i>Acidaminococcus</i>      | <i>fermentans</i>      | DSM 20731  | 0.1                                       |                                                      |                                                | 37                  | 7.5 | glutamate                                      | [207]                  |
| <i>Acidaminococcus</i>      | <i>fermentans</i>      | DSM 20731  | 0.89                                      |                                                      |                                                | 37                  | 7.5 | trans-aconitate                                | [208]                  |
| <i>Bacillus</i>             | <i>megaterium</i>      | ATCC 15374 |                                           |                                                      | 0.84                                           | 35                  |     | 5 g/L glucose                                  | [209]                  |
| <i>Bacillus</i>             | <i>megaterium</i>      | ATCC 15374 |                                           |                                                      | 1.17                                           | 35                  |     | 10 g/L glucose                                 | [209]                  |
| <i>Bacillus</i>             | <i>megaterium</i>      | ATCC 15374 |                                           |                                                      | 0.98                                           | 35                  |     | 15 g/L glucose                                 | [209]                  |
| <i>Bacillus</i>             | <i>megaterium</i>      | ATCC 15374 |                                           |                                                      | 1.23                                           | 35                  |     | 20 g/L glucose                                 | [209]                  |
| <i>Bacteroides</i>          | <i>fragilis</i>        | ATCC 25285 | 0.01                                      |                                                      | 5.56                                           | 37                  | 7.0 | glucose (with vitamin B12)                     | [98]                   |
| <i>Bacteroides</i>          | <i>fragilis</i>        | ATCC 25285 | 0.09                                      |                                                      | 50                                             | 37                  | 7.0 | glucose (without vitamin B12)                  | [98]                   |
| <i>Bacteroides</i>          | <i>splanchnicus</i>    | VPI 6842   | 0.10                                      |                                                      | 55.6                                           | 37                  | 7.0 | glucose (with heme, without<br>vitamin B12)    | [98]                   |
| <i>Bacteroides</i>          | <i>splanchnicus</i>    | VPI 6842   | 0.14                                      |                                                      |                                                | 37                  | 7.0 | glucose (with heme)                            | [98]                   |
| <i>Bacteroides</i>          | <i>splanchnicus</i>    | VPI 6842   | 0.14                                      |                                                      | 77.8                                           | 37                  | 7.0 | glucose (with heme, with<br>vitamin B12)       | [98]                   |
| <i>Bacteroides</i>          | <i>splanchnicus</i>    | VPI 6842   | 0.91                                      |                                                      |                                                | 37                  | 7.0 | glucose (without heme)                         | [98]                   |
| <i>Caldicellulosiruptor</i> | <i>saccharolyticus</i> | DSM 8903   | 0.48                                      |                                                      |                                                | 70                  | 7.2 | silphium leaves                                | [35]                   |
| <i>Caldicellulosiruptor</i> | <i>saccharolyticus</i> | DSM 8903   | 1.75                                      |                                                      |                                                | 70                  | 7.2 | sweet shorghum plant                           | [35]                   |
| <i>Caldicellulosiruptor</i> | <i>saccharolyticus</i> | DSM 8903   | 1.80                                      |                                                      |                                                | 70                  | 7.2 | untreated maize leaves                         | [35]                   |
| <i>Caldicellulosiruptor</i> | <i>saccharolyticus</i> | DSM 8903   | 2.30                                      |                                                      |                                                | 70                  | 7.2 | bagasse                                        | [35]                   |
| <i>Caldicellulosiruptor</i> | <i>saccharolyticus</i> | DSM 8903   | 2.63                                      |                                                      |                                                | 70                  | 7.2 | vacuum evaporated sweet<br>shorghum juice      | [35]                   |
| <i>Caldicellulosiruptor</i> | <i>saccharolyticus</i> | DSM 8903   | 2.98                                      |                                                      |                                                | 70                  | 7.2 | sweet shorghum juice                           | [35]                   |
| <i>Caldicellulosiruptor</i> | <i>saccharolyticus</i> | DSM 8903   | 3.67                                      |                                                      |                                                | 70                  | 7.2 | pretrated maize leaves                         | [35]                   |
| <i>Caldicellulosiruptor</i> | <i>saccharolyticus</i> | DSM 8903   | 3.80                                      |                                                      |                                                | 70                  | 7.2 | wheat straw                                    | [35]                   |

|                    |                       |             |       |       |      |    |         |                                         |       |
|--------------------|-----------------------|-------------|-------|-------|------|----|---------|-----------------------------------------|-------|
| <i>Caloramator</i> | <i>viterbensis</i>    | DSM 13723   | 0.2   |       |      | 60 | 6       | glucose                                 | [210] |
| <i>Caloramator</i> | <i>viterbensis</i>    | DSM 13723   | 0.401 |       |      | 60 | 6       | glycerol                                | [210] |
| <i>Citrobacter</i> | <i>amalonaticus</i>   | Y19         | 1.12  | 11.26 |      | 30 |         | 5 g/L glucose                           | [211] |
| <i>Citrobacter</i> | <i>amalonaticus</i>   | Y19         | 1.12  | 10.3  |      | 30 |         | 9 g/L glucose                           | [211] |
| <i>Citrobacter</i> | <i>amalonaticus</i>   | Y19         | 1.24  | 15.71 |      | 30 |         | 1.5 g/L glucose                         | [211] |
| <i>Citrobacter</i> | <i>amalonaticus</i>   | Y19         |       | 25.8  |      | 30 |         | formate                                 | [212] |
| <i>Citrobacter</i> | <i>amalonaticus</i>   | Y19         |       | 6.6   |      | 30 |         | pyruvate                                | [212] |
| <i>Citrobacter</i> | <i>amalonaticus</i>   | Y19         |       | 19.5  |      | 30 |         | methylviologen                          | [212] |
| <i>Citrobacter</i> | <i>amalonaticus</i>   | Y19         |       | 27    |      | 30 |         | benzylviologen                          | [212] |
| <i>Citrobacter</i> | sp.                   | Y19         | 1.05  | 32.3  |      | 36 | 6.0-7.0 | 10% (w/v) glucose                       | [213] |
| <i>Citrobacter</i> | sp.                   | Y19         | 2.49  | 32.3  |      | 36 | 6.0-7.0 | 1% (w/v) glucose                        | [213] |
| <i>Clostridium</i> | <i>acetobutylicum</i> | ATCC 4259   | 1.178 |       |      | 34 | 5.4     | glucose (carbon monoxide in headspace)  | [214] |
| <i>Clostridium</i> | <i>acetobutylicum</i> | ATCC 4259   | 1.391 |       |      | 34 | 5.4     | glucose                                 | [214] |
| <i>Clostridium</i> | <i>acetobutylicum</i> | ATCC 824    | 2.3   |       |      | 35 | 6.5     | cellobiose                              | [215] |
| <i>Clostridium</i> | <i>acetobutylicum</i> | IAM 190011  |       |       | 0.83 | 37 | 7       | glucose                                 | [120] |
| <i>Clostridium</i> | <i>acetobutylicum</i> | IAM 190012  |       |       | 0.5  | 37 | 7       | glucose                                 | [120] |
| <i>Clostridium</i> | <i>acetobutylicum</i> | NCIMB 13357 | 3.28  |       | 6.64 | 30 | 7.0     | glucose (no CO <sub>2</sub> scavenging) | [216] |
| <i>Clostridium</i> | <i>acetobutylicum</i> | NCIMB 13357 | 3.39  |       | 3.92 | 30 | 7.0     | glucose (CO <sub>2</sub> scavenging)    | [216] |
| <i>Clostridium</i> | <i>acetobutylicum</i> | X9          |       | 6.4   |      | 37 | 5.0     | microcrystalline cellulose              | [201] |
| <i>Clostridium</i> | <i>beijerinckii</i>   | ATCC 25752  |       |       | 0.69 | 35 |         | 5 g/L glucose                           | [217] |
| <i>Clostridium</i> | <i>beijerinckii</i>   | ATCC 25752  |       |       | 1.08 | 35 |         | 10 g/L glucose                          | [217] |
| <i>Clostridium</i> | <i>beijerinckii</i>   | ATCC 25752  |       |       | 1.48 | 35 |         | 15 g/L glucose                          | [217] |
| <i>Clostridium</i> | <i>beijerinckii</i>   | ATCC 25752  |       |       | 1.3  | 35 |         | 20 g/L glucose                          | [217] |
| <i>Clostridium</i> | <i>beijerinckii</i>   | Fanp3       | 1.26  |       | 12.3 | 36 | 6.5     | xylose                                  | [82]  |
| <i>Clostridium</i> | <i>beijerinckii</i>   | Fanp3       | 1.27  |       | 6.4  | 36 | 6.5     | galactose                               | [82]  |
| <i>Clostridium</i> | <i>beijerinckii</i>   | Fanp3       | 1.55  |       | 22   | 36 | 6.5     | mannose                                 | [82]  |
| <i>Clostridium</i> | <i>beijerinckii</i>   | Fanp3       | 1.72  |       | 27.3 | 36 | 6.5     | fructose                                | [82]  |

|                    |                     |          |      |      |       |    |      |                                                       |       |
|--------------------|---------------------|----------|------|------|-------|----|------|-------------------------------------------------------|-------|
| <i>Clostridium</i> | <i>beijerinckii</i> | Fanp3    | 1.86 |      | 27    | 36 | 6.5  | glucose                                               | [82]  |
| <i>Clostridium</i> | <i>beijerinckii</i> | Fanp3    | 2.03 |      | 24.8  | 35 | 6.47 | glucose                                               | [82]  |
| <i>Clostridium</i> | <i>beijerinckii</i> | Fanp3    | 2.58 |      | 10.2  | 36 | 6.5  | lactose                                               | [82]  |
| <i>Clostridium</i> | <i>beijerinckii</i> | Fanp3    | 3.72 |      | 22    | 36 | 6.5  | maltose                                               | [82]  |
| <i>Clostridium</i> | <i>beijerinckii</i> | Fanp3    | 3.9  |      | 27.5  | 36 | 6.5  | cellobiose                                            | [82]  |
| <i>Clostridium</i> | <i>beijerinckii</i> | Fanp3    | 4.20 |      | 22.1  | 36 | 6.5  | sucrose                                               | [82]  |
| <i>Clostridium</i> | <i>beijerinckii</i> | Fanp3    |      |      | 34.3  | 36 | 6.5  | dextrin                                               | [82]  |
| <i>Clostridium</i> | <i>beijerinckii</i> | RZF-1108 | 0.61 | 8.38 |       | 35 | 10.0 | 10 g/L glucose                                        | [218] |
| <i>Clostridium</i> | <i>beijerinckii</i> | RZF-1108 | 1.86 | 4.46 |       | 35 | 7.0  | 10 g/L glucose                                        | [218] |
| <i>Clostridium</i> | <i>beijerinckii</i> | RZF-1108 | 1.97 | 4.65 | 4.93  | 35 | 7.0  | 9 g/L glucose                                         | [218] |
| <i>Clostridium</i> | <i>butyricum</i>    | CGS2     | 0.45 |      | 0.67  | 37 | 7.5  | xylose (static incubation)                            | [219] |
| <i>Clostridium</i> | <i>butyricum</i>    | CGS2     | 0.58 |      | 4.02  | 37 | 7.5  | xylose (incubation by shaking)                        | [219] |
| <i>Clostridium</i> | <i>butyricum</i>    | CGS2     | 1.1  |      | 10.3  | 37 | 7.5  | sucrose (incubation by shaking)                       | [219] |
| <i>Clostridium</i> | <i>butyricum</i>    | CGS2     | 1.35 |      | 11.2  | 37 | 7.5  | sucrose (static incubation)                           | [219] |
| <i>Clostridium</i> | <i>butyricum</i>    | CGS2     |      |      | 5.53  | 37 |      | cassava starch                                        | [220] |
| <i>Clostridium</i> | <i>butyricum</i>    | CGS2     |      |      | 5.27  | 37 |      | starch                                                | [220] |
| <i>Clostridium</i> | <i>butyricum</i>    | CGS2     |      |      | 9.4   | 37 |      | soluble starch                                        | [221] |
| <i>Clostridium</i> | <i>butyricum</i>    | CGS2     |      |      | 0.59  | 37 |      | rice husk                                             | [221] |
| <i>Clostridium</i> | <i>butyricum</i>    | CGS2     |      |      | 0.46  | 37 |      | <i>Arabidopsis</i> sp. starch (wildtype)              | [221] |
| <i>Clostridium</i> | <i>butyricum</i>    | CGS2     |      |      | 1.47  | 37 |      | <i>Arabidopsis</i> sp. starch ( <i>sex1-1</i> mutant) | [221] |
| <i>Clostridium</i> | <i>butyricum</i>    | CGS5     | 0.7  |      | 2.79  | 37 | 7.5  | xylan hydrolysate (static incubation)                 | [222] |
| <i>Clostridium</i> | <i>butyricum</i>    | CGS5     | 0.76 |      | 1.2   | 37 | 7.5  | pretreated rice straw hydrolysate                     | [222] |
| <i>Clostridium</i> | <i>butyricum</i>    | CGS5     |      |      | 0.007 | 37 | 7.5  | pretreated rice straw                                 | [222] |
| <i>Clostridium</i> | <i>butyricum</i>    | CGS5     |      |      | 1.58  | 37 |      | xylan                                                 | [222] |
| <i>Clostridium</i> | <i>butyricum</i>    | CGS5     | 0.5  |      | 5.35  | 37 | 7.5  | 10 g COD/L xylose                                     | [219] |
| <i>Clostridium</i> | <i>butyricum</i>    | CGS5     | 0.6  |      | 4.11  | 37 | 7.5  | 5 g COD/L xylose                                      | [219] |
| <i>Clostridium</i> | <i>butyricum</i>    | CGS5     | 0.65 |      | 10.3  | 37 | 7.5  | 30 g COD/L xylose                                     | [219] |

|                    |                  |            |      |      |       |    |     |                                                            |       |
|--------------------|------------------|------------|------|------|-------|----|-----|------------------------------------------------------------|-------|
| <i>Clostridium</i> | <i>butyricum</i> | CGS5       | 0.65 |      | 11.8  | 37 | 7.5 | 40 g COD/L xylose                                          | [219] |
| <i>Clostridium</i> | <i>butyricum</i> | CGS5       | 0.7  |      | 9.59  | 37 | 7.5 | 20 g COD/L xylose                                          | [219] |
| <i>Clostridium</i> | <i>butyricum</i> | CGS5       | 0.72 |      | 5.58  | 37 | 7.5 | xylose (static incubation)                                 | [219] |
| <i>Clostridium</i> | <i>butyricum</i> | CGS5       | 1.3  |      | 8.92  | 37 | 7.5 | sucrose (static incubation)                                | [219] |
| <i>Clostridium</i> | <i>butyricum</i> | CGS5       | 0.98 |      | 11.87 | 37 | 7.5 | sucrose (incubation by shaking)                            | [29]  |
| <i>Clostridium</i> | <i>butyricum</i> | CGS5       | 1.01 |      | 8.54  | 37 | 7.5 | glucose                                                    | [29]  |
| <i>Clostridium</i> | <i>butyricum</i> | CGS5       | 1.05 |      | 2.57  | 37 | 7.5 | xylose (incubation by shaking)                             | [29]  |
| <i>Clostridium</i> | <i>butyricum</i> | CGS5       | 1.15 |      | 7.53  | 37 | 7.5 | fructose                                                   | [29]  |
| <i>Clostridium</i> | <i>butyricum</i> | CGS5       |      |      | 0.005 | 37 | 7.5 | 0.97 g/L carboxymethyl cellulose hydrolysate               | [223] |
| <i>Clostridium</i> | <i>butyricum</i> | CGS5       |      |      | 0.044 | 37 | 7.5 | 1.27 g/L carboxymethyl cellulose hydrolysate               | [223] |
| <i>Clostridium</i> | <i>butyricum</i> | CGS5       |      |      | 0.014 | 37 | 7.5 | xylan hydrolysate (incubation by shaking)                  | [223] |
| <i>Clostridium</i> | <i>butyricum</i> | CGS5       |      |      | 9.2   | 37 |     | soluble starchw                                            | [221] |
| <i>Clostridium</i> | <i>butyricum</i> | DSM 10702  |      |      | 9.15  | 30 | 7.5 | glucose                                                    | [224] |
| <i>Clostridium</i> | <i>butyricum</i> | IAM 19002  |      |      | 1.44  | 37 | 7   | glucose                                                    | [120] |
| <i>Clostridium</i> | <i>butyricum</i> | IAM 19003  |      |      | 1.67  | 37 | 7   | glucose                                                    | [120] |
| <i>Clostridium</i> | <i>butyricum</i> | IFO 3847   |      |      | 1.75  | 37 | 7   | glucose                                                    | [120] |
| <i>Clostridium</i> | <i>butyricum</i> | IFO 3847   | 1.64 |      | 0.45  | 37 | 7.0 | glucose (cells gel-immobilized)                            | [225] |
| <i>Clostridium</i> | <i>butyricum</i> | IFO 3847   | 3.55 |      | 0.975 | 37 | 7.0 | glucose (cells gel-immobilized, washing and reutilization) | [225] |
| <i>Clostridium</i> | <i>butyricum</i> | IFO13949   | 1.8  |      |       | 30 | 7.0 | starch, 15 mM glutamat acid                                | [226] |
| <i>Clostridium</i> | <i>butyricum</i> | IFO13949   | 1.9  |      |       | 30 | 7.0 | starch, 5 mM glutamat acid                                 | [226] |
| <i>Clostridium</i> | <i>butyricum</i> | IFO13949   | 1.9  |      |       | 30 | 7.0 | starch, 10 mM glutamat acid                                | [226] |
| <i>Clostridium</i> | <i>butyricum</i> | M1         | 0.11 |      | 0.22  | 40 |     | glucose                                                    | [227] |
| <i>Clostridium</i> | <i>butyricum</i> | M1         |      |      | 0.16  | 40 |     | brewery yeast waste                                        | [227] |
| <i>Clostridium</i> | <i>butyricum</i> | SC-E1      | 2.0  |      |       | 30 | 6.7 | glucose and polypeptone                                    | [228] |
| <i>Clostridium</i> | <i>butyricum</i> | TISTR 1032 | 0.75 | 5.26 |       | 37 | 8.0 | sugarcane bargasse hydrolysate                             | [229] |

|                    |                       |            |      |       |  |    |     |                                                       |       |
|--------------------|-----------------------|------------|------|-------|--|----|-----|-------------------------------------------------------|-------|
| <i>Clostridium</i> | <i>butyricum</i>      | TISTR 1032 | 1.07 | 7.44  |  | 37 | 7.0 | sugarcane bagasse hydrolysate                         | [229] |
| <i>Clostridium</i> | <i>butyricum</i>      | TISTR 1032 | 1.09 | 7.93  |  | 37 | 6.5 | sugarcane bagasse hydrolysate                         | [229] |
| <i>Clostridium</i> | <i>butyricum</i>      | TISTR 1032 | 1.21 | 8.98  |  | 37 | 6.0 | sugarcane bagasse hydrolysate                         | [229] |
| <i>Clostridium</i> | <i>butyricum</i>      | TISTR 1032 | 1.39 | 2.32  |  | 37 | 5.5 | 2.59 g COD/L sugarcane bagasse hydrolysate            | [229] |
| <i>Clostridium</i> | <i>butyricum</i>      | TISTR 1032 | 1.41 | 11.01 |  | 37 | 5.5 | 40.74 g COD/L sugarcane bagasse hydrolysate           | [229] |
| <i>Clostridium</i> | <i>butyricum</i>      | TISTR 1032 | 1.43 | 4.70  |  | 37 | 5.5 | 5.33 g COD/L sugarcane bagasse hydrolysate            | [229] |
| <i>Clostridium</i> | <i>butyricum</i>      | TISTR 1032 | 1.46 | 1.40  |  | 37 | 5.5 | 1.49 g COD/L sugarcane bagasse hydrolysate            | [229] |
| <i>Clostridium</i> | <i>butyricum</i>      | TISTR 1032 | 1.51 | 9.12  |  | 37 | 5.5 | 10.55 g COD/L sugarcane bagasse hydrolysate           | [229] |
| <i>Clostridium</i> | <i>butyricum</i>      | TISTR 1032 | 1.73 | 12.65 |  | 37 | 5.5 | 20 g COD/L sugarcane bagasse hydrolysate              | [229] |
| <i>Clostridium</i> | <i>butyricum</i>      | TISTR 1032 | 1.73 | 12.63 |  | 37 | 5.5 | 20.66 g COD/L sugarcane bagasse hydrolysate           | [229] |
| <i>Clostridium</i> | <i>butyricum</i>      |            | 2.25 |       |  | 30 | 6.0 | cellobiose                                            | [230] |
| <i>Clostridium</i> | <i>butyricum</i>      |            | 1.63 |       |  | 37 | 7.0 | glucose                                               | [231] |
| <i>Clostridium</i> | <i>celerecrescens</i> | DSM5628    | 1.25 |       |  | 35 | 6.5 | cellulose (Avicel)                                    | [215] |
| <i>Clostridium</i> | <i>celerecrescens</i> | DSM5628    | 1.5  |       |  | 35 | 6.5 | cellulose (MN 301)                                    | [215] |
| <i>Clostridium</i> | <i>celerecrescens</i> | DSM5628    | 1.6  |       |  | 35 | 6.5 | cellobiose                                            | [215] |
| <i>Clostridium</i> | <i>cellobioparum</i>  | DSM 1351   | 1.1  |       |  | 35 | 6.5 | cellulose (Avicel)                                    | [215] |
| <i>Clostridium</i> | <i>cellobioparum</i>  | DSM 1351   | 1.45 |       |  | 35 | 6.5 | cellulose (MN 301)                                    | [215] |
| <i>Clostridium</i> | <i>cellobioparum</i>  | DSM 1351   | 1.9  |       |  | 35 | 6.5 | cellobiose                                            | [215] |
| <i>Clostridium</i> | <i>cellobioparum</i>  |            | 1.57 |       |  | 39 | 6.8 | 0.6% (w/v) glucose                                    | [232] |
| <i>Clostridium</i> | <i>cellobioparum</i>  |            | 2.04 |       |  | 39 | 6.8 | 0.4% (w/v) glucose (headspace gas regularly released) | [232] |
| <i>Clostridium</i> | <i>cellobioparum</i>  |            | 2.11 |       |  | 39 | 6.8 | 0.2% (w/v) glucose                                    | [232] |
| <i>Clostridium</i> | <i>cellobioparum</i>  |            | 2.11 |       |  | 39 | 6.8 | 0.6% (w/v) glucose (headspace gas regularly released) | [232] |
| <i>Clostridium</i> | <i>cellobioparum</i>  |            | 2.24 |       |  | 39 | 6.8 | 0.4% (w/v) glucose                                    | [232] |

|                    |                        |             |       |  |      |    |     |                                                             |       |
|--------------------|------------------------|-------------|-------|--|------|----|-----|-------------------------------------------------------------|-------|
| <i>Clostridium</i> | <i>cellobioparum</i>   |             | 2.54  |  |      | 39 | 6.8 | 0.2% (w/v) glucose<br>(headspace gas regularly<br>released) | [232] |
| <i>Clostridium</i> | <i>cellulolyticum</i>  | ATCC 35319  | 1.6   |  |      | 35 | 6.5 | cellulose (Avicel)                                          | [215] |
| <i>Clostridium</i> | <i>cellulolyticum</i>  | ATCC 35319  | 1.7   |  |      | 35 | 6.5 | cellulose (MN 301)                                          | [215] |
| <i>Clostridium</i> | <i>cellulolyticum</i>  | ATCC 35319  | 1.8   |  |      | 35 | 6.5 | cellobiose                                                  | [215] |
| <i>Clostridium</i> | <i>chartatabidum</i>   |             | 1.26  |  |      | 39 |     | cellobiose                                                  | [233] |
| <i>Clostridium</i> | <i>cochlearium</i>     | DSM 1285    | 0.084 |  |      | 37 | 7.5 | glutamate                                                   | [207] |
| <i>Clostridium</i> | <i>cochlearium</i>     | DSM 1285    | 1.0   |  |      | 37 | 7.5 | citrate                                                     | [207] |
| <i>Clostridium</i> | <i>diolis</i>          | JPCC H-3    |       |  | 0.11 | 40 | 6.8 | peptone and yeast extract                                   | [234] |
| <i>Clostridium</i> | <i>diolis</i>          | JPCC H-3    |       |  | 0.54 | 40 | 6.8 | formic acid                                                 | [234] |
| <i>Clostridium</i> | <i>diolis</i>          | JPCC H-3    |       |  | 0.11 | 40 | 6.8 | acetic acid                                                 | [234] |
| <i>Clostridium</i> | <i>diolis</i>          | JPCC H-3    |       |  | 0.1  | 40 | 6.8 | propionic acid                                              | [234] |
| <i>Clostridium</i> | <i>diolis</i>          | JPCC H-3    |       |  | 0.4  | 40 | 6.8 | pyvuric acid                                                | [234] |
| <i>Clostridium</i> | <i>diolis</i>          | JPCC H-3    |       |  | 0.15 | 40 | 6.8 | lactic acid                                                 | [234] |
| <i>Clostridium</i> | <i>diolis</i>          | JPCC H-3    |       |  | 0.13 | 40 | 6.8 | succinic acid                                               | [234] |
| <i>Clostridium</i> | <i>diolis</i>          | JPCC H-3    |       |  | 0.31 | 40 | 6.8 | maleic acid                                                 | [234] |
| <i>Clostridium</i> | <i>diolis</i>          | JPCC H-3    |       |  | 0.11 | 40 | 6.8 | citric acid                                                 | [234] |
| <i>Clostridium</i> | <i>diolis</i>          | JPCC H-3    |       |  | 0.62 | 40 | 6.8 | glucose                                                     | [234] |
| <i>Clostridium</i> | <i>diolis</i>          | JPCC H-3    |       |  | 0.53 | 40 | 6.8 | acetic acid, lactic acid                                    | [234] |
| <i>Clostridium</i> | <i>diolis</i>          | JPCC H-3    |       |  | 0.19 | 40 | 6.8 | lactic acid, succinic acid                                  | [234] |
| <i>Clostridium</i> | <i>diolis</i>          | JPCC H-3    |       |  | 0.13 | 40 | 6.8 | acetic acid, succinic acid                                  | [234] |
| <i>Clostridium</i> | <i>diolis</i>          | JPCC H-3    |       |  | 0.51 | 40 | 6.8 | acetic acid, lactic acid,<br>succinic acid                  | [234] |
| <i>Clostridium</i> | <i>homopropionicum</i> | LuHBu1      | 1.35  |  |      | 37 | 7.2 | fructose                                                    | [130] |
| <i>Clostridium</i> | <i>hungatei</i>        | ATCC 700212 | 1.65  |  |      | 30 | 7.2 | cellulose and NH <sub>4</sub> Cl                            | [131] |
| <i>Clostridium</i> | <i>hungatei</i>        | ATCC 700212 | 1.92  |  |      | 30 | 7.2 | cellulose                                                   | [131] |
| <i>Clostridium</i> | <i>pasteurianum</i>    | CH1         | 1.9   |  | 13.4 | 37 | 7.5 | sucrose (static incubation)                                 | [219] |
| <i>Clostridium</i> | <i>pasteurianum</i>    | CH1         | 2.1   |  | 15.6 | 37 | 7.5 | sucrose (incubation by<br>shaking)                          | [219] |
| <i>Clostridium</i> | <i>pasteurianum</i>    | CH4         | 2.25  |  | 15.4 | 37 | 7.5 | sucrose (static incubation)                                 | [219] |

|                    |                                   |             |      |  |      |    |     |                                    |       |
|--------------------|-----------------------------------|-------------|------|--|------|----|-----|------------------------------------|-------|
| <i>Clostridium</i> | <i>pasteurianum</i>               | CH4         | 2.4  |  | 4.91 | 37 | 7.5 | 5 g COD/L sucrose                  | [219] |
| <i>Clostridium</i> | <i>pasteurianum</i>               | CH4         | 3.1  |  | 17.0 | 37 | 7.5 | 10 g COD/L sucrose                 | [219] |
| <i>Clostridium</i> | <i>pasteurianum</i>               | CH4         | 3.1  |  | 22.5 | 37 | 7.5 | 20 g COD/L sucrose                 | [219] |
| <i>Clostridium</i> | <i>pasteurianum</i>               | CH4         | 3.15 |  | 22.8 | 37 | 7.5 | sucrose (incubation by shaking)    | [219] |
| <i>Clostridium</i> | <i>pasteurianum</i>               | CH4         | 4    |  | 25.0 | 37 | 7.5 | 30 g COD/L sucrose                 | [219] |
| <i>Clostridium</i> | <i>pasteurianum</i>               | CH4         | 4.14 |  | 25.4 | 37 | 7.5 | 40 g COD/L sucrose                 | [219] |
| <i>Clostridium</i> | <i>pasteurianum</i>               | CH4         | 3.80 |  |      | 32 | 7.0 | sucrose                            | [235] |
| <i>Clostridium</i> | <i>pasteurianum</i>               | CH4         |      |  | 2.81 | 37 |     | cassava starch                     | [220] |
| <i>Clostridium</i> | <i>pasteurianum</i>               | CH4         |      |  | 2.23 | 37 |     | starch                             | [220] |
| <i>Clostridium</i> | <i>pasteurianum</i>               | CH5         | 1.5  |  | 13.6 | 37 | 7.5 | sucrose (static incubation)        | [219] |
| <i>Clostridium</i> | <i>pasteurianum</i>               | CH5         | 2    |  | 18.1 | 37 | 7.5 | sucrose (incubation by shaking)    | [219] |
| <i>Clostridium</i> | <i>pasteurianum</i>               | CH7         | 1.45 |  | 9.82 | 37 | 7.5 | sucrose (static incubation)        | [219] |
| <i>Clostridium</i> | <i>pasteurianum</i>               | CH7         | 2.2  |  | 18.5 | 37 | 7.5 | sucrose (incubation by shaking)    | [219] |
| <i>Clostridium</i> | <i>peptidivorans</i>              | DSM 12505   | 1    |  |      | 37 | 7   | cysteine                           | [137] |
| <i>Clostridium</i> | <i>perfringens</i>                | strain A    |      |  | 0.11 | 37 | 7   | glucose                            | [120] |
| <i>Clostridium</i> | <i>perfringens</i>                | strain B    |      |  | 0.14 | 37 | 7   | glucose                            | [120] |
| <i>Clostridium</i> | <i>perfringens</i>                | strain C    |      |  | 0.5  | 37 | 7   | glucose                            | [120] |
| <i>Clostridium</i> | <i>phytofermentans</i>            | ATCC 700394 | 1    |  |      | 35 | 6.5 | cellulose (Avicel)                 | [215] |
| <i>Clostridium</i> | <i>phytofermentans</i>            | ATCC 700394 | 1.4  |  |      | 35 | 6.5 | cellulose (MN 301)                 | [215] |
| <i>Clostridium</i> | <i>phytofermentans</i>            | ATCC 700394 | 1.55 |  |      | 35 | 6.5 | cellobiose                         | [215] |
| <i>Clostridium</i> | <i>populeti</i>                   | DSM 5832    | 1.45 |  |      | 35 | 6.5 | cellulose (Avicel)                 | [215] |
| <i>Clostridium</i> | <i>populeti</i>                   | DSM 5832    | 1.6  |  |      | 35 | 6.5 | cellulose (MN 301)                 | [215] |
| <i>Clostridium</i> | <i>populeti</i>                   | DSM 5832    | 1.85 |  |      | 35 | 6.5 | cellobiose                         | [215] |
| <i>Clostridium</i> | <i>saccharoperbutylacetonicum</i> | ATCC 13564  | 1.40 |  |      | 37 | 6.0 | glucose (incubation with light)    | [236] |
| <i>Clostridium</i> | <i>saccharoperbutylacetonicum</i> | ATCC 13564  | 3.10 |  |      | 37 | 6.0 | glucose (incubation without light) | [236] |
| <i>Clostridium</i> | <i>saccharoperbutylacetonicum</i> | ATCC 27021  | 0.74 |  | 5    | 30 | 6.0 | glucose                            | [237] |
| <i>Clostridium</i> | <i>saccharoperbutylacetonicum</i> | ATCC 27021  | 1.20 |  | 6.2  | 30 | 7.5 | fructose                           | [237] |

|                    |                                 |            |      |  |       |    |      |                     |       |
|--------------------|---------------------------------|------------|------|--|-------|----|------|---------------------|-------|
| <i>Clostridium</i> | <i>saccharoperbutylaceticum</i> | ATCC 27021 | 1.31 |  | 9.55  | 30 | 6.5  | glucose             | [237] |
| <i>Clostridium</i> | <i>saccharoperbutylaceticum</i> | ATCC 27021 | 1.40 |  | 9.25  | 30 | 8.0  | glucose             | [237] |
| <i>Clostridium</i> | <i>saccharoperbutylaceticum</i> | ATCC 27021 | 1.43 |  | 9.4   | 30 | 7.5  | glucose             | [237] |
| <i>Clostridium</i> | <i>saccharoperbutylaceticum</i> | ATCC 27021 | 1.58 |  | 11.35 | 30 | 7.0  | glucose             | [237] |
| <i>Clostridium</i> | <i>saccharoperbutylaceticum</i> | ATCC 27021 | 1.72 |  | 10    | 30 | 8.5  | glucose             | [237] |
| <i>Clostridium</i> | <i>saccharoperbutylaceticum</i> | ATCC 27021 | 2.77 |  | 1.1   | 30 | 7.5  | maltose             | [237] |
| <i>Clostridium</i> | <i>saccharoperbutylaceticum</i> | ATCC 27021 | 2.82 |  | 5.4   | 30 | 7.5  | lactose             | [237] |
| <i>Clostridium</i> | <i>saccharoperbutylaceticum</i> | ATCC 27021 | 2.83 |  | 8.75  | 30 | 7.5  | sucrose             | [237] |
| <i>Clostridium</i> | <i>saccharoperbutylaceticum</i> | ATCC 27021 |      |  | 8.67  | 30 | 5.0  | diluted cheese whey | [238] |
| <i>Clostridium</i> | <i>saccharoperbutylaceticum</i> | ATCC 27021 |      |  | 10.5  | 30 | 6.0  | diluted cheese whey | [238] |
| <i>Clostridium</i> | <i>saccharoperbutylaceticum</i> | ATCC 27021 |      |  | 6.54  | 30 | 7.0  | diluted cheese whey | [238] |
| <i>Clostridium</i> | <i>saccharoperbutylaceticum</i> | ATCC 27021 |      |  | 6.45  | 30 | 8.0  | diluted cheese whey | [238] |
| <i>Clostridium</i> | <i>saccharoperbutylaceticum</i> | ATCC 27021 |      |  | 5.32  | 30 | 9.0  | diluted cheese whey | [238] |
| <i>Clostridium</i> | <i>saccharoperbutylaceticum</i> | ATCC 27021 |      |  | 11.78 | 30 | 10.0 | diluted cheese whey | [238] |
| <i>Clostridium</i> | sp.                             | CB5        | 1.6  |  |       |    | 4.0  | glucose             | [180] |
| <i>Clostridium</i> | sp.                             | CB5        | 2.24 |  |       |    | 5.0  | glucose             | [180] |
| <i>Clostridium</i> | sp.                             | CB5        | 2.66 |  |       |    | 6.0  | glucose             | [180] |
| <i>Clostridium</i> | sp.                             | CB5        | 2.77 |  |       |    | 7.0  | glucose             | [180] |
| <i>Clostridium</i> | sp.                             | DMHC-10    | 0.04 |  | 0.006 | 37 | 4.0  | glucose             | [230] |
| <i>Clostridium</i> | sp.                             | DMHC-10    | 2.38 |  | 2.96  | 37 | 7.0  | glucose             | [230] |
| <i>Clostridium</i> | sp.                             | DMHC-10    | 2.76 |  | 3.569 | 37 | 6.0  | glucose             | [230] |
| <i>Clostridium</i> | sp.                             | DMHC-10    | 3.35 |  | 3.978 | 37 | 5.0  | glucose             | [230] |
| <i>Clostridium</i> | sp.                             | Fanp2      | 2.4  |  |       | 36 | 6.5  | glucose             | [239] |
| <i>Clostridium</i> | sp.                             | Fanp2      | 2.53 |  | 12.3  | 36 | 6.47 | glucose             | [55]  |
| <i>Clostridium</i> | sp.                             | R1         | 0.63 |  |       | 30 | 6.0  | xylose              | [230] |
| <i>Clostridium</i> | sp.                             | R1         | 1.66 |  |       | 30 | 6.0  | galactose           | [230] |
| <i>Clostridium</i> | sp.                             | R1         | 1.68 |  |       | 30 | 6.0  | mannose             | [230] |
| <i>Clostridium</i> | sp.                             | R1         | 2.01 |  |       | 30 | 6.0  | glucose             | [230] |
| <i>Clostridium</i> | sp.                             | R1         | 3.09 |  |       | 30 | 6.0  | sucrose             | [230] |



|                    |     |              |           |  |      |    |     |                                              |           |
|--------------------|-----|--------------|-----------|--|------|----|-----|----------------------------------------------|-----------|
| <i>Clostridium</i> | sp. | R1           | 3.13      |  |      | 30 | 6.0 | maltose                                      | [230]     |
| <i>Clostridium</i> | sp. | R1           | 3.24      |  |      | 30 | 6.0 | lactose                                      | [230]     |
| <i>Clostridium</i> | sp. | R1           | 2.11      |  |      | 30 | 6.0 | cellobiose, 200 mg/L sulfide                 | [53]      |
| <i>Clostridium</i> | sp. | R1           | 2.98      |  |      | 30 | 6.0 | cellobiose, 5 mg/L nitrite                   | [53]      |
| <i>Clostridium</i> | sp. | R1           | 3.2       |  |      | 30 | 6.0 | cellobiose, 50 mg/L sulfide                  | [53]      |
| <i>Clostridium</i> | sp. | R1           | 3.21      |  |      | 30 | 6.0 | cellobiose, 1 mg/L nitrite                   | [53]      |
| <i>Clostridium</i> | sp. | R1           | 3.3       |  |      | 30 | 6.0 | cellobiose, 75 mg/L sulfide                  | [53]      |
| <i>Clostridium</i> | sp. | R1           | 3.47      |  |      | 30 | 6.0 | cellobiose, 0.1 mg/L nitrite                 | [53]      |
| <i>Clostridium</i> | sp. | R1           | 3.54      |  |      | 30 | 6.0 | cellobiose, 0.01 mg/L nitrite                | [53]      |
| <i>Clostridium</i> | sp. | R1           | 3.52-3.57 |  |      | 30 | 6.0 | cellobiose                                   | [53, 230] |
| <i>Clostridium</i> | sp. | strain no. 2 | 0.29      |  | 14   | 36 | 6.8 | xylose                                       | [240]     |
| <i>Clostridium</i> | sp. | strain no. 2 | 0.3       |  | 15.6 | 36 | 6.8 | xylose (incubation with albazyme)            | [240]     |
| <i>Clostridium</i> | sp. | strain no. 2 | 2.42      |  | 17.9 | 36 | 6.8 | xylose                                       | [240]     |
| <i>Clostridium</i> | sp. | strain no. 2 | 2.63      |  | 21.5 | 36 | 6.8 | glucose                                      | [240]     |
| <i>Clostridium</i> | sp. | strain no. 2 |           |  | 18.9 | 36 | 6.8 | avicel hydrolysate                           | [240]     |
| <i>Clostridium</i> | sp. | strain no. 2 |           |  | 18.8 | 36 | 6.8 | xylan hydrolysate                            | [240]     |
| <i>Clostridium</i> | sp. | strain no. 2 |           |  | 5.87 | 36 | 6.8 | xylan                                        | [240]     |
| <i>Clostridium</i> | sp. | strain no. 2 |           |  | 15.6 | 36 | 6.8 | xylan (incubation with albazyme)             | [240]     |
| <i>Clostridium</i> | sp. | TCW1         |           |  | 0.63 | 60 | 7.0 | Whatman filter paper (static incubation)     | [54]      |
| <i>Clostridium</i> | sp. | TCW1         |           |  | 2.6  | 60 | 7.0 | Whatman filter paper (incubation by shaking) | [54]      |
| <i>Clostridium</i> | sp. | TCW1         |           |  | 2.6  | 60 | 7.0 | avicel                                       | [54]      |
| <i>Clostridium</i> | sp. | TCW1         |           |  | 2.5  | 60 | 7.0 | cellulose                                    | [54]      |
| <i>Clostridium</i> | sp. | TCW1         |           |  | 0.9  | 60 | 7.0 | rice straw                                   | [54]      |
| <i>Clostridium</i> | sp. | TCW1         |           |  | 0.9  | 60 | 7.0 | bargasse                                     | [54]      |
| <i>Clostridium</i> | sp. | TCW1         |           |  | 0.7  | 60 | 7.0 | napiersgrass                                 | [54]      |
| <i>Clostridium</i> | sp. | TCW1         |           |  | 0.7  | 60 | 7.0 | wheat straw                                  | [54]      |
| <i>Clostridium</i> | sp. | TCW1         |           |  | 0.7  | 60 | 7.0 | corn cob                                     | [54]      |

|                    |                           |            |       |  |       |    |             |                                     |       |
|--------------------|---------------------------|------------|-------|--|-------|----|-------------|-------------------------------------|-------|
| <i>Clostridium</i> | sp.                       | X53        |       |  | 6.02  | 35 | 6.8         | xylan                               | [241] |
| <i>Clostridium</i> | sp.                       | X53        |       |  | 7.36  | 40 | 6.8         | xylan                               | [241] |
| <i>Clostridium</i> | sp.                       | X53        |       |  | 0.76  | 45 | 6.8         | xylan                               | [241] |
| <i>Clostridium</i> | sp.                       | X53        |       |  | 7.14  | 40 | 5.0         | xylan                               | [241] |
| <i>Clostridium</i> | sp.                       | X53        |       |  | 10.71 | 40 | 6.0         | xylan                               | [241] |
| <i>Clostridium</i> | sp.                       | X53        |       |  | 2.5   | 40 | 7.0         | xylan                               | [241] |
| <i>Clostridium</i> | sp.                       | X53        |       |  | 7.05  | 40 | 6.8         | xylan (pH not controlled)           | [241] |
| <i>Clostridium</i> | sp.                       | X53        |       |  | 3.02  | 36 | 6.5         | xylose                              | [241] |
| <i>Clostridium</i> | <i>sporosphaeroides</i>   | ATCC 25781 | 0.3   |  |       | 37 | 7.5         | crotonate                           | [207] |
| <i>Clostridium</i> | <i>sporosphaeroides</i>   | ATCC 25781 | 0.33  |  |       | 37 | 7.5         | glutamate                           | [207] |
| <i>Clostridium</i> | <i>sporosphaeroides</i>   | ATCC 25781 | 0.74  |  |       | 37 | 7.5         | citrate                             | [207] |
| <i>Clostridium</i> | <i>symbiosum</i>          | HB 25      | 0.06  |  |       | 37 | 7.5         | glutamate                           | [207] |
| <i>Clostridium</i> | <i>tetanomorphum</i>      | DSM 528    | 0.197 |  |       | 37 | 7.5         | glutamate                           | [207] |
| <i>Clostridium</i> | <i>thermoalcaliphilum</i> | DSM 7309   |       |  | 0.09  | 50 | 10.5        | yeast extract, tryptone             | [242] |
| <i>Clostridium</i> | <i>thermoalcaliphilum</i> | DSM 7309   |       |  | 0.37  | 50 | 10.5        | yeast extract, tryptone,<br>glucose | [242] |
| <i>Clostridium</i> | <i>thermoalcaliphilum</i> | DSM 7309   |       |  | 0.14  | 50 | 7.5         | yeast extract, tryptone             | [242] |
| <i>Clostridium</i> | <i>thermoalcaliphilum</i> | DSM 7309   |       |  | 0.1   | 50 | 7.5         | yeast extract, tryptone,<br>glucose | [242] |
| <i>Clostridium</i> | <i>thermobutyricum</i>    | DSM 4928   | 0.36  |  |       | 57 | 8.4-<br>8.6 | pyruvate                            | [243] |
| <i>Clostridium</i> | <i>thermobutyricum</i>    | DSM 4928   | 1.76  |  |       | 57 | 8.4-<br>8.6 | glucose and 0.3% yeast<br>extract   | [243] |
| <i>Clostridium</i> | <i>thermobutyricum</i>    | DSM 4928   | 2.4   |  |       | 57 | 8.4-<br>8.6 | glucose and 2% yeast extract        | [243] |
| <i>Clostridium</i> | <i>thermocellum</i>       | ATCC 27405 | 0.99  |  |       | 60 | 6.38        | delignified wood fibers             | [244] |
| <i>Clostridium</i> | <i>thermocellum</i>       | ATCC 27405 | 1.13  |  |       | 60 | 6.04        | cellobiose                          | [244] |
| <i>Clostridium</i> | <i>thermocellum</i>       | ATCC 27405 | 1.47  |  |       | 60 | 6.95        | delignified wood fibers             | [244] |
| <i>Clostridium</i> | <i>thermocellum</i>       | ATCC 27405 | 1.63  |  |       | 60 | 7.28        | cellobiose                          | [244] |
| <i>Clostridium</i> | <i>thermocellum</i>       | ATCC 27405 | 1.7   |  |       | 60 |             | whatman paper                       | [244] |
| <i>Clostridium</i> | <i>thermocellum</i>       | ATCC 27405 | 1.73  |  |       | 60 | 6.88        | cellobiose                          | [244] |
| <i>Clostridium</i> | <i>thermocellum</i>       | ATCC 27405 | 1.9   |  |       | 60 |             | cellulose                           | [244] |

|                    |                              |            |       |      |      |    |         |                                                                      |       |
|--------------------|------------------------------|------------|-------|------|------|----|---------|----------------------------------------------------------------------|-------|
| <i>Clostridium</i> | <i>thermocellum</i>          | ATCC 27405 | 2.32  |      |      | 60 | 7.08    | delignified wood fibers                                              | [244] |
| <i>Clostridium</i> | <i>thermocellum</i>          | ATCC 27405 | 1.28  | 3.99 |      | 60 | 7.25    | 5 g/L cellulose                                                      | [245] |
| <i>Clostridium</i> | <i>thermocellum</i>          | ATCC 27405 | 1.90  | 6.41 |      | 60 | 7.25    | 1 g/L cellulose                                                      | [245] |
| <i>Clostridium</i> | <i>thermocellum</i>          | ATCC 27405 |       | 8.4  |      | 60 | 7.35    | 0,1 g/L cellobiose                                                   | [246] |
| <i>Clostridium</i> | <i>thermocellum</i>          | ATCC 27405 |       | 12.9 |      | 60 | 7.35    | 1,1 g/L cellobiose                                                   | [246] |
| <i>Clostridium</i> | <i>thermocellum</i>          | ATCC 27405 |       | 14.6 |      | 60 | 7.35    | 4.5 g/L cellobiose                                                   | [246] |
| <i>Clostridium</i> | <i>thermocellum</i>          | ATCC 27405 | 0.14  |      | 0.23 | 60 | 7.2     | cellulose                                                            | [247] |
| <i>Clostridium</i> | <i>thermocellum</i>          | ATCC 27405 | 0.21  |      | 0.09 | 60 | 7.2     | barley hulls                                                         | [247] |
| <i>Clostridium</i> | <i>thermocellum</i>          | ATCC 27405 | 0.22  |      | 0.23 | 60 | 7.2     | dried distiller grains                                               | [247] |
| <i>Clostridium</i> | <i>thermocellum</i>          | ATCC 27405 | 0.23  |      | 0.24 | 60 | 7.2     | barley hulls (contaminated)                                          | [247] |
| <i>Clostridium</i> | <i>thermocellum</i>          | JN4        | 0.8   |      |      | 60 |         | microcrystalline cellulose                                           | [142] |
| <i>Clostridium</i> | <i>thermocellum</i>          | LQ8        | 0.85  |      |      | 60 | 7.8     | cellulose                                                            | [248] |
| <i>Clostridium</i> | <i>thermocellum</i>          | LQ8        | 2.25  |      |      | 60 | 7.8     | cellulose (incubation with <i>M. thermoautotrophicum</i> $\Delta$ H) | [248] |
| <i>Clostridium</i> | <i>thermohydrosulfuricum</i> | 39E        | 0.015 |      |      | 65 |         | starch                                                               | [249] |
| <i>Clostridium</i> | <i>thermohydrosulfuricum</i> | 39E        | 0.017 |      |      | 65 |         | glucose                                                              | [249] |
| <i>Clostridium</i> | <i>thermohydrosulfuricum</i> | 39E        | 0.017 |      |      | 65 |         | maltose                                                              | [249] |
| <i>Clostridium</i> | <i>thermohydrosulfuricum</i> | ATCC 33223 | 0.45  |      |      | 60 |         | glucose (initial heaspace gas 100% N <sub>2</sub> )                  | [250] |
| <i>Clostridium</i> | <i>thermohydrosulfuricum</i> | ATCC 33223 | 0.55  |      |      | 60 |         | glucose (initial heaspace gas 100% H <sub>2</sub> )                  | [250] |
| <i>Clostridium</i> | <i>thermolacticum</i>        | DSM 2910   | 1.46  |      |      | 60 | 7-7.2   | lactose                                                              | [251] |
| <i>Clostridium</i> | <i>thermolacticum</i>        | DSM 2911   | 2.00  |      |      | 65 | 7.2-7.4 | lactose                                                              | [251] |
| <i>Clostridium</i> | <i>thermosuccinogenes</i>    | DSM 5809   | 0.10  |      |      | 37 | 6.5     | inulin                                                               | [252] |
| <i>Clostridium</i> | <i>thermosuccinogenes</i>    | DSM 5809   | 0.14  |      |      | 47 | 6.5     | inulin                                                               | [252] |
| <i>Clostridium</i> | <i>thermosuccinogenes</i>    | DSM 5809   | 0.15  |      |      | 58 | 6.5     | inulin                                                               | [252] |
| <i>Clostridium</i> | <i>thermosuccinogenes</i>    | DSM 5809   | 0.25  |      |      | 70 | 6.5     | inulin                                                               | [252] |
| <i>Clostridium</i> | <i>thermosulfurogenes</i>    | 4B         | 0.104 |      |      | 60 |         | glucose                                                              | [249] |
| <i>Clostridium</i> | <i>thermosulfurogenes</i>    | 4B         | 0.123 |      |      | 60 |         | maltose                                                              | [249] |
| <i>Clostridium</i> | <i>thermosulfurogenes</i>    | 4B         | 0.146 |      |      | 60 |         | starch                                                               | [249] |

|                     |                           |            |       |    |       |    |         |                   |       |
|---------------------|---------------------------|------------|-------|----|-------|----|---------|-------------------|-------|
| <i>Clostridium</i>  | <i>thermosulfurogenes</i> | DSM 2229   | 0.95  |    | 0.96  | 60 | 5.5-6.5 | glucose           | [253] |
| <i>Clostridium</i>  | <i>thermosulfurogenes</i> | DSM 2229   |       |    | 1.32  | 60 | 5.5-6.5 | pectin            | [253] |
| <i>Clostridium</i>  | <i>thermosulfurogenes</i> | DSM 2229   |       |    | 1     | 60 | 5.5-6.5 | polygalacturonate | [253] |
| <i>Clostridium</i>  | <i>thermosulfurogenes</i> | DSM 2229   |       |    | 0.72  | 60 | 5.5-6.5 | xylose            | [253] |
| <i>Clostridium</i>  | <i>thermosulfurogenes</i> | DSM 2229   |       |    | 0.7   | 60 | 5.5-6.5 | arabinose         | [253] |
| <i>Clostridium</i>  | <i>uliginosum</i>         | DSM 12992  | 2.6   |    |       | 20 | 6.9     | xylose            | [254] |
| <i>Clostridium</i>  | <i>uliginosum</i>         | DSM 12992  | 2.7   |    |       | 20 | 6.9     | mannose           | [254] |
| <i>Clostridium</i>  | <i>uliginosum</i>         | DSM 12992  | 3.6   |    |       | 20 | 6.9     | glucose           | [254] |
| <i>Clostridium</i>  | <i>uliginosum</i>         | DSM 12992  | 5.8   |    |       | 20 | 6.9     | cellobiose        | [254] |
| <i>Clostridium</i>  | <i>ultunense</i>          | DSM 10521  | 0.004 |    |       | 37 | 7.0     | cysteine          | [255] |
| <i>Clostridium</i>  | <i>ultunense</i>          | DSM 10521  | 0.025 |    |       | 37 | 7.0     | pyruvate          | [255] |
| <i>Clostridium</i>  | <i>ultunense</i>          | DSM 10521  | 0.08  |    |       | 37 | 7.0     | glucose           | [255] |
| <i>Enterobacter</i> | <i>aerogenes</i>          | A-1        | 0.84  |    | 3.25  | 37 | 6.8     | glucose           | [256] |
| <i>Enterobacter</i> | <i>aerogenes</i>          | ATCC 29007 |       | 19 |       | 38 | 6.13    | glucose           | [86]  |
| <i>Enterobacter</i> | <i>aerogenes</i>          | AY-2       | 1.17  |    | 4.23  | 37 | 6.8     | glucose           | [256] |
| <i>Enterobacter</i> | <i>aerogenes</i>          | HO-39      | 0.83  |    |       | 35 | 6.5     | lactose           | [257] |
| <i>Enterobacter</i> | <i>aerogenes</i>          | HO-39      | 0.88  |    |       | 35 | 6.5     | fructose          | [257] |
| <i>Enterobacter</i> | <i>aerogenes</i>          | HO-39      | 0.95  |    |       | 35 | 6.5     | galactose         | [257] |
| <i>Enterobacter</i> | <i>aerogenes</i>          | HO-39      | 0.98  |    |       | 35 | 6.5     | mannose           | [257] |
| <i>Enterobacter</i> | <i>aerogenes</i>          | HO-39      | 1.68  |    |       | 35 | 6.5     | mannitol          | [257] |
| <i>Enterobacter</i> | <i>aerogenes</i>          | HO-39      | 1.89  |    |       | 35 | 6.5     | surcose           | [257] |
| <i>Enterobacter</i> | <i>aerogenes</i>          | HO-39      | 2.16  |    |       | 35 | 6.5     | maltose           | [257] |
| <i>Enterobacter</i> | <i>aerogenes</i>          | HO-39      |       |    | 13.39 | 30 | 7       | glucose           | [257] |
| <i>Enterobacter</i> | <i>aerogenes</i>          | HO-39      | 1     |    | 16.95 | 35 | 6.5     | glucose           | [257] |
| <i>Enterobacter</i> | <i>aerogenes</i>          | HO-39      |       |    | 13.83 | 38 | 6.5     | glucose           | [257] |
| <i>Enterobacter</i> | <i>aerogenes</i>          | HO-39      |       |    |       | 35 | 6.5     | starch            | [257] |
| <i>Enterobacter</i> | <i>aerogenes</i>          | HO-39      |       |    |       | 35 | 6.5     | cellulose         | [257] |

|                     |                  |        |      |  |      |    |     |                                                 |       |
|---------------------|------------------|--------|------|--|------|----|-----|-------------------------------------------------|-------|
| <i>Enterobacter</i> | <i>aerogenes</i> | HO-39  |      |  |      | 35 | 6.5 | dextrin                                         | [257] |
| <i>Enterobacter</i> | <i>aerogenes</i> | HO-39  |      |  | 8.9  | 37 | 6.5 | glucose (cells immobilized in carrageenan)      | [258] |
| <i>Enterobacter</i> | <i>aerogenes</i> | HO-39  |      |  | 8.7  | 37 | 6.5 | glucose (cells immobilized in calcium alginate) | [258] |
| <i>Enterobacter</i> | <i>aerogenes</i> | HO-39  |      |  | 11.2 | 37 | 6.5 | glucose (cells immobilized in agar)             | [258] |
| <i>Enterobacter</i> | <i>aerogenes</i> | HO-39  |      |  | 12.5 | 37 | 6.5 | glucose (cells immobilized on polyester)        | [258] |
| <i>Enterobacter</i> | <i>aerogenes</i> | HO-39  |      |  | 16.4 | 37 | 6.5 | glucose (cells immobilized in chitosan beads)   | [258] |
| <i>Enterobacter</i> | <i>aerogenes</i> | HO-39  |      |  | 15.3 | 37 | 6.5 | glucose (cells immobilized on glass beads)      | [258] |
| <i>Enterobacter</i> | <i>aerogenes</i> | HO-39  |      |  | 12.9 | 37 | 6.5 | glucose (cells immobilized on cellulose foam)   | [258] |
| <i>Enterobacter</i> | <i>aerogenes</i> | HO-39  |      |  | 7.2  | 37 | 6.5 | glucose (cells immobilized in carrageenan)      | [258] |
| <i>Enterobacter</i> | <i>aerogenes</i> | HO-39  |      |  | 4    | 37 | 6.5 | glucose (cells immobilized in calcium alginate) | [258] |
| <i>Enterobacter</i> | <i>aerogenes</i> | HO-39  |      |  | 7.7  | 37 | 6.5 | glucose (cells immobilized in agar)             | [258] |
| <i>Enterobacter</i> | <i>aerogenes</i> | HO-39  |      |  | 6.3  | 37 | 6.5 | glucose (cells immobilized on polyester)        | [258] |
| <i>Enterobacter</i> | <i>aerogenes</i> | HO-39  |      |  | 6.1  | 37 | 6.5 | glucose (cells immobilized in chitosan beads)   | [258] |
| <i>Enterobacter</i> | <i>aerogenes</i> | HO-39  |      |  | 11.6 | 37 | 6.5 | glucose (cells immobilized on glass beads)      | [258] |
| <i>Enterobacter</i> | <i>aerogenes</i> | HO-39  |      |  | 6.0  | 37 | 6.5 | glucose (cells immobilized on cellulose foam)   | [258] |
| <i>Enterobacter</i> | <i>aerogenes</i> | HU-101 | 0.71 |  |      | 37 | 6.8 | 10 g/L glycerol (from biodiesel)                | [259] |
| <i>Enterobacter</i> | <i>aerogenes</i> | HU-101 | 0.82 |  |      | 37 | 6.8 | 25 g/L glycerol                                 | [259] |
| <i>Enterobacter</i> | <i>aerogenes</i> | HU-101 | 0.89 |  |      | 37 | 6.8 | 10 g/L glycerol                                 | [259] |
| <i>Enterobacter</i> | <i>aerogenes</i> | HU-101 | 0.9  |  |      | 37 | 6.8 | 3.3 g/L glycerol (from biodiesel)               | [259] |
| <i>Enterobacter</i> | <i>aerogenes</i> | HU-101 | 1.05 |  |      | 37 | 6.8 | 5 g/L glycerol                                  | [259] |
| <i>Enterobacter</i> | <i>aerogenes</i> | HU-101 | 1.12 |  |      | 37 | 6.8 | 1.17 g/L glycerol (from biodiesel)              | [259] |
| <i>Enterobacter</i> | <i>aerogenes</i> | HU-101 | 0.28 |  |      | 37 | 6.8 | gluconate                                       | [260] |
| <i>Enterobacter</i> | <i>aerogenes</i> | HU-101 | 0.34 |  |      | 37 | 6.8 | galactose                                       | [260] |

|                     |                    |                      |       |  |       |    |     |                                                       |       |
|---------------------|--------------------|----------------------|-------|--|-------|----|-----|-------------------------------------------------------|-------|
| <i>Enterobacter</i> | <i>aerogenes</i>   | HU-101               | 0.39  |  |       | 37 | 6.8 | fructose                                              | [260] |
| <i>Enterobacter</i> | <i>aerogenes</i>   | HU-101               | 0.9   |  |       | 37 | 6.8 | sorbitol                                              | [260] |
| <i>Enterobacter</i> | <i>aerogenes</i>   | HU-101               | 0.95  |  |       | 37 | 6.8 | mannitol                                              | [260] |
| <i>Enterobacter</i> | <i>aerogenes</i>   | HU-101               | 0.56  |  | 2.16  | 37 | 6.8 | 20 g/L glucose                                        | [256] |
| <i>Enterobacter</i> | <i>aerogenes</i>   | HU-101               | 0.80  |  |       | 37 | 6.8 | 10 g/L glucose                                        | [261] |
| <i>Enterobacter</i> | <i>aerogenes</i>   | HZ-3                 | 0.83  |  | 3.42  | 37 | 6.8 | glucose                                               | [256] |
| <i>Enterobacter</i> | <i>aerogenes</i>   | IAM 1183             |       |  | 1.37  | 37 |     | lactose                                               | [262] |
| <i>Enterobacter</i> | <i>aerogenes</i>   | VP-1                 | 1.03  |  |       | 37 | 7.2 | glucose                                               | [261] |
| <i>Enterobacter</i> | <i>aerogenes</i>   | VP-1                 | 1.10  |  |       | 37 | 6.4 | glucose                                               | [261] |
| <i>Enterobacter</i> | <i>aerogenes</i>   | VP-1                 | 1.21  |  |       | 37 | 6.0 | glucose                                               | [261] |
| <i>Enterobacter</i> | <i>aerogenes</i>   | VP-1                 | 1.21  |  |       | 37 | 6.8 | glucose (pH controlled)                               | [261] |
| <i>Enterobacter</i> | <i>aerogenes</i>   | VP-1                 | 1.76  |  |       | 37 | 6.8 | glucose (pH not controlled)                           | [261] |
| <i>Enterobacter</i> | <i>aerogenes</i>   | VP-2                 | 1.06  |  |       | 37 | 6.8 | glucose                                               | [261] |
| <i>Enterobacter</i> | <i>aerogenes</i>   |                      |       |  | 9.4   | 38 | 7   | glucose                                               | [263] |
| <i>Enterobacter</i> | <i>agglomerans</i> | C-1                  | 1.03  |  |       | 30 | 7.0 | glucose                                               | [264] |
| <i>Enterobacter</i> | <i>agglomerans</i> | C-2                  | 1.035 |  |       | 30 | 7.0 | glucose                                               | [264] |
| <i>Enterobacter</i> | <i>agglomerans</i> | CDC 811-74           | 1.014 |  |       | 30 | 7.0 | glucose                                               | [264] |
| <i>Enterobacter</i> | <i>cloacae</i>     | F.P 01               | 2.71  |  |       | 36 | 5.0 | maltose                                               | [265] |
| <i>Enterobacter</i> | sp.                | 18P16                | 0.34  |  |       | 37 |     | cellulose                                             | [266] |
| <i>Enterobacter</i> | sp.                | CN1                  | 2.0   |  | 1.81  | 40 | 7.0 | xylose                                                | [85]  |
| <i>Enterobacter</i> | sp.                | CN1                  |       |  | 1.64  | 40 | 7.0 | glucose                                               | [85]  |
| <i>Enterobacter</i> | sp.                | CN1                  |       |  | 1.45  | 40 | 7.0 | sucrose                                               | [85]  |
| <i>Escherichia</i>  | <i>coli</i>        | BL21(DE3) pFEGA      |       |  | 0.026 | 30 |     | glycerol                                              | [267] |
| <i>Escherichia</i>  | <i>coli</i>        | BL21(DE3) pFEGA pISC |       |  | 0.018 | 30 |     | glycerol                                              | [267] |
| <i>Escherichia</i>  | <i>coli</i>        | BL21(DE3)            |       |  | 0.26  | 37 |     | glucose/formate<br>(hydrogenase 1 of <i>E. coli</i> ) | [268] |
| <i>Escherichia</i>  | <i>coli</i>        | BL21(DE3)            |       |  | 0.11  | 37 |     | glucose (hydrogenase 1 of <i>E. coli</i> )            | [268] |
| <i>Escherichia</i>  | <i>coli</i>        | BL21(DE3)            |       |  | 0.18  | 37 |     | glucose (NiFe hydrogenase<br>of <i>M. marinus</i> )   | [269] |

|                    |             |                                                             |       |  |       |    |     |          |       |
|--------------------|-------------|-------------------------------------------------------------|-------|--|-------|----|-----|----------|-------|
| <i>Escherichia</i> | <i>coli</i> | BL21(DE3) $\Delta$ IscR<br>pFEGA                            |       |  | 0.076 | 30 |     | glycerol | [267] |
| <i>Escherichia</i> | <i>coli</i> | BL21(DE3)H                                                  | 0.006 |  |       | 37 | 7.0 | glucose  | [270] |
| <i>Escherichia</i> | <i>coli</i> | BL21(DE3)HFdY                                               | 0.009 |  |       | 37 | 7.0 | glucose  | [270] |
| <i>Escherichia</i> | <i>coli</i> | BL21(DE3)HFdYg                                              | 0.014 |  |       | 37 | 7.0 | glucose  | [270] |
| <i>Escherichia</i> | <i>coli</i> | BL21(DE3)HFdYz                                              | 0.007 |  |       | 37 | 7.0 | glucose  | [270] |
| <i>Escherichia</i> | <i>coli</i> | BL21(DE3)HFdYzg                                             | 0.022 |  |       | 37 | 7.0 | glucose  | [270] |
| <i>Escherichia</i> | <i>coli</i> | BW25113                                                     |       |  | 2.64  | 37 |     | glucose  | [64]  |
| <i>Escherichia</i> | <i>coli</i> | BW25113                                                     |       |  | 1.1   | 37 |     | formate  | [65]  |
| <i>Escherichia</i> | <i>coli</i> | BW25113 <i>fhlA</i>                                         |       |  | 0.11  | 37 |     | glucose  | [64]  |
| <i>Escherichia</i> | <i>coli</i> | BW25113<br><i>fhlA</i> /pCA24N                              |       |  | 0.07  | 37 |     | glucose  | [64]  |
| <i>Escherichia</i> | <i>coli</i> | BW25113<br><i>fhlA</i> /pCA24N-FhlA                         |       |  | 3     | 37 |     | glucose  | [64]  |
| <i>Escherichia</i> | <i>coli</i> | BW25113 <i>hyaB</i>                                         |       |  | 0.35  | 37 |     | formate  | [65]  |
| <i>Escherichia</i> | <i>coli</i> | BW25113 <i>hyaB</i><br><i>hybC</i>                          |       |  | 3.52  | 37 |     | glucose  | [64]  |
| <i>Escherichia</i> | <i>coli</i> | BW25113 <i>hyaB</i><br><i>hybC</i>                          |       |  | 3.52  | 37 |     | formate  | [65]  |
| <i>Escherichia</i> | <i>coli</i> | BW25113 <i>hyaB</i><br><i>hybC fhlA</i>                     |       |  | 0.09  | 37 |     | glucose  | [64]  |
| <i>Escherichia</i> | <i>coli</i> | BW25113 <i>hyaB</i><br><i>hybC fhlA</i> /pCA24N             |       |  | 0.07  | 37 |     | glucose  | [64]  |
| <i>Escherichia</i> | <i>coli</i> | BW25113 <i>hyaB</i><br><i>hybC fhlA</i> /pCA24N-<br>FhlA    |       |  | 3     | 37 |     | glucose  | [64]  |
| <i>Escherichia</i> | <i>coli</i> | BW25113 <i>hyaB</i><br><i>hybC hycA</i>                     |       |  | 5.28  | 37 |     | formate  | [65]  |
| <i>Escherichia</i> | <i>coli</i> | BW25113 <i>hyaB</i><br><i>hybC hycA fdnG</i>                |       |  | 3.08  | 37 |     | formate  | [65]  |
| <i>Escherichia</i> | <i>coli</i> | BW25113 <i>hyaB</i><br><i>hybC hycA fdnG</i><br><i>fdoG</i> |       |  | 10.98 | 37 |     | formate  | [65]  |
| <i>Escherichia</i> | <i>coli</i> | BW25113 <i>hyaB</i><br><i>hybC hycA fdoG</i>                |       |  | 11.66 | 37 |     | formate  | [65]  |
| <i>Escherichia</i> | <i>coli</i> | BW25113 <i>hyaB</i><br><i>hybC hycA fdoG</i><br><i>focA</i> |       |  | 10.56 | 37 |     | formate  | [65]  |

|                    |             |                                                                                         |  |  |      |    |  |         |      |
|--------------------|-------------|-----------------------------------------------------------------------------------------|--|--|------|----|--|---------|------|
| <i>Escherichia</i> | <i>coli</i> | BW25113 <i>hyaB</i><br><i>hybC hycA</i><br><i>fdoG/pCA24N</i>                           |  |  | 14.5 | 37 |  | formate | [65] |
| <i>Escherichia</i> | <i>coli</i> | BW25113 <i>hyaB</i><br><i>hybC hycA</i><br><i>fdoG/pCA24N-FhIA</i>                      |  |  | 17.8 | 37 |  | formate | [65] |
| <i>Escherichia</i> | <i>coli</i> | BW25113 <i>hyaB</i><br><i>hybC hycA fnr</i>                                             |  |  | 1.1  | 37 |  | formate | [65] |
| <i>Escherichia</i> | <i>coli</i> | BW25113 <i>hyaB</i><br><i>hybC hycA focA</i>                                            |  |  | 5.28 | 37 |  | formate | [65] |
| <i>Escherichia</i> | <i>coli</i> | BW25113 <i>hyaB</i><br><i>hybC hycA focA</i><br><i>focB</i>                             |  |  | 2.64 | 37 |  | formate | [65] |
| <i>Escherichia</i> | <i>coli</i> | BW25113 <i>hyaB</i><br><i>hybC hycA focA</i><br><i>focB narG</i>                        |  |  | 7.92 | 37 |  | formate | [65] |
| <i>Escherichia</i> | <i>coli</i> | BW25113 <i>hyaB</i><br><i>hybC hycA focA</i><br><i>focB narG/pCA24N-</i><br><i>FhIA</i> |  |  | 7.7  | 37 |  | formate | [65] |
| <i>Escherichia</i> | <i>coli</i> | BW25113 <i>hyaB</i><br><i>hybC hycA focA</i><br><i>narG</i>                             |  |  | 4.18 | 37 |  | formate | [65] |
| <i>Escherichia</i> | <i>coli</i> | BW25113 <i>hyaB</i><br><i>hybC hycA</i><br><i>focA/pCA24N-FhIA</i>                      |  |  | 12.8 | 37 |  | formate | [65] |
| <i>Escherichia</i> | <i>coli</i> | BW25113 <i>hyaB</i><br><i>hybC hycA focB</i>                                            |  |  | 5.72 | 37 |  | formate | [65] |
| <i>Escherichia</i> | <i>coli</i> | BW25113 <i>hyaB</i><br><i>hybC hycA focB</i><br><i>fdnG</i>                             |  |  | 0.13 | 37 |  | formate | [65] |
| <i>Escherichia</i> | <i>coli</i> | BW25113 <i>hyaB</i><br><i>hybC hycA focB</i><br><i>fdnG fdoG</i>                        |  |  | 0.2  | 37 |  | formate | [65] |
| <i>Escherichia</i> | <i>coli</i> | BW25113 <i>hyaB</i><br><i>hybC hycA focB</i><br><i>fdoG</i>                             |  |  | 0.24 | 37 |  | formate | [65] |
| <i>Escherichia</i> | <i>coli</i> | BW25113 <i>hyaB</i><br><i>hybC hycA focB</i><br><i>narG</i>                             |  |  | 6.82 | 37 |  | formate | [65] |
| <i>Escherichia</i> | <i>coli</i> | BW25113 <i>hyaB</i><br><i>hybC hycA focB</i><br><i>narG/pCA24N-FhIA</i>                 |  |  | 10.6 | 37 |  | formate | [65] |



|                    |             |                                                                    |  |  |       |    |     |          |       |
|--------------------|-------------|--------------------------------------------------------------------|--|--|-------|----|-----|----------|-------|
| <i>Escherichia</i> | <i>coli</i> | BW25113 <i>hyaB</i><br><i>hybC hycA</i><br><i>focB/pCA24N-FhIA</i> |  |  | 13    | 37 |     | formate  | [65]  |
| <i>Escherichia</i> | <i>coli</i> | BW25113 <i>hyaB</i><br><i>hybC hycA narG</i>                       |  |  | 4.84  | 37 |     | formate  | [65]  |
| <i>Escherichia</i> | <i>coli</i> | BW25113 <i>hyaB</i><br><i>hybC hycA</i><br><i>narG/pCA24N-FhIA</i> |  |  | 12.3  | 37 |     | formate  | [65]  |
| <i>Escherichia</i> | <i>coli</i> | BW25113 <i>hyaB</i><br><i>hybC hycA/pCA24N</i>                     |  |  | 6.38  | 37 |     | formate  | [65]  |
| <i>Escherichia</i> | <i>coli</i> | BW25113 <i>hyaB</i><br><i>hybC hycA/pCA24N-</i><br><i>FhIA</i>     |  |  | 12.1  | 37 |     | formate  | [65]  |
| <i>Escherichia</i> | <i>coli</i> | BW25113 <i>hyaB</i><br><i>hybC hycE</i>                            |  |  | 0.07  | 37 |     | formate  | [66]  |
| <i>Escherichia</i> | <i>coli</i> | BW25113 <i>hyaB</i><br><i>hybC hycE</i>                            |  |  | 0.1   | 37 |     | glucose  | [64]  |
| <i>Escherichia</i> | <i>coli</i> | BW25113 <i>hyaB</i><br><i>hybC</i><br><i>hycE/pBS(Kan)</i>         |  |  | 0.02  | 37 |     | fructose | [64]  |
| <i>Escherichia</i> | <i>coli</i> | BW25113 <i>hyaB</i><br><i>hybC</i><br><i>hycE/pBS(Kan)HycE</i>     |  |  | 0.25  | 37 |     | fructose | [64]  |
| <i>Escherichia</i> | <i>coli</i> | BW25113 <i>hyaB</i><br><i>hybC hycE/pCA24N</i>                     |  |  | 0.06  | 37 |     | formate  | [65]  |
| <i>Escherichia</i> | <i>coli</i> | BW25113 <i>hyaB</i><br><i>hybC/pCA24N-FhIA</i>                     |  |  | 10.56 | 37 |     | formate  | [65]  |
| <i>Escherichia</i> | <i>coli</i> | BW25113 <i>hybC</i>                                                |  |  | 1.54  | 37 |     | formate  | [65]  |
| <i>Escherichia</i> | <i>coli</i> | BW25113 <i>hycE</i>                                                |  |  | 0.1   | 37 |     | glucose  | [64]  |
| <i>Escherichia</i> | <i>coli</i> | BW25113<br><i>hycE/pBS(Kan)</i>                                    |  |  | 0.02  | 37 |     | fructose | [64]  |
| <i>Escherichia</i> | <i>coli</i> | BW25113<br><i>hycE/pBS(Kan)HycE</i>                                |  |  | 0.17  | 37 |     | fructose | [64]  |
| <i>Escherichia</i> | <i>coli</i> | BW25113 <i>hyfG</i>                                                |  |  | 2.53  | 37 |     | glucose  | [64]  |
| <i>Escherichia</i> | <i>coli</i> | BW25113 $\Delta$ <i>frdC</i>                                       |  |  | 0.07  | 37 | 6.3 | glycerol | [271] |
| <i>Escherichia</i> | <i>coli</i> | BW25113/pBS(Kan)                                                   |  |  | 0.49  | 37 |     | fructose | [64]  |
| <i>Escherichia</i> | <i>coli</i> | BW25113/pCA24N                                                     |  |  | 2.42  | 37 |     | glucose  | [64]  |
| <i>Escherichia</i> | <i>coli</i> | BW25113/pCA24N                                                     |  |  | 0.66  | 37 |     | formate  | [65]  |
| <i>Escherichia</i> | <i>coli</i> | BW25113/pCA24N-                                                    |  |  | 3.12  | 37 |     | formate  | [65]  |

|                    |             | FhIA                |      |  |      |    |     |                                  |       |
|--------------------|-------------|---------------------|------|--|------|----|-----|----------------------------------|-------|
| <i>Escherichia</i> | <i>coli</i> | DJT135              | 1.95 |  |      | 37 |     | glucose                          | [272] |
| <i>Escherichia</i> | <i>coli</i> | epHycE17            |      |  | 0.46 | 37 |     | formate                          | [66]  |
| <i>Escherichia</i> | <i>coli</i> | epHycE21            |      |  | 1.01 | 37 |     | formate                          | [66]  |
| <i>Escherichia</i> | <i>coli</i> | epHycE23-2          |      |  | 0.51 | 37 |     | formate                          | [66]  |
| <i>Escherichia</i> | <i>coli</i> | epHycE39            |      |  | 0.44 | 37 |     | formate                          | [66]  |
| <i>Escherichia</i> | <i>coli</i> | epHycE67            |      |  | 0.9  | 37 |     | formate                          | [66]  |
| <i>Escherichia</i> | <i>coli</i> | epHycE70            |      |  | 0.7  | 37 |     | formate                          | [66]  |
| <i>Escherichia</i> | <i>coli</i> | epHycE95            |      |  | 1.1  | 37 |     | formate                          | [66]  |
| <i>Escherichia</i> | <i>coli</i> | FJT135              | 1.3  |  |      | 37 |     | glucose                          | [272] |
| <i>Escherichia</i> | <i>coli</i> | HW1                 |      |  | 0.04 | 37 | 6.3 | glycerol                         | [271] |
| <i>Escherichia</i> | <i>coli</i> | HW2                 |      |  | 0.92 | 37 | 6.3 | glycerol                         | [271] |
| <i>Escherichia</i> | <i>coli</i> | IFO 12713           |      |  | 1.28 | 37 | 7   | glucose                          | [120] |
| <i>Escherichia</i> | <i>coli</i> | J62-1               |      |  | 5.46 | 28 |     | glucose                          | [273] |
| <i>Escherichia</i> | <i>coli</i> | J62-1               |      |  | 12.5 | 28 |     | formate                          | [273] |
| <i>Escherichia</i> | <i>coli</i> | J62-1(pNG2)         |      |  | 4.31 | 28 |     | glucose                          | [273] |
| <i>Escherichia</i> | <i>coli</i> | J62-1(pNG2)         |      |  | 11.5 | 28 |     | formate                          | [273] |
| <i>Escherichia</i> | <i>coli</i> | JW135               | 1.25 |  |      | 37 |     | glucose                          | [272] |
| <i>Escherichia</i> | <i>coli</i> | JW2701-1(pASKA2701) |      |  | 0.18 | 37 |     | glucose/formate                  | [69]  |
| <i>Escherichia</i> | <i>coli</i> | JW2701-1(pVSC1157)  |      |  | 0.64 | 37 |     | glucose/formate                  | [69]  |
| <i>Escherichia</i> | <i>coli</i> | JW2701-1(pVSC133)   |      |  | 1.54 | 37 |     | glucose/formate                  | [69]  |
| <i>Escherichia</i> | <i>coli</i> | JW2701-1(pVSC14)    |      |  | 0.77 | 37 |     | glucose/formate                  | [69]  |
| <i>Escherichia</i> | <i>coli</i> | JW2701-1(pVSC363)   |      |  | 1.1  | 37 |     | glucose/formate                  | [69]  |
| <i>Escherichia</i> | <i>coli</i> | LJT135              | 1.6  |  |      | 37 |     | glucose                          | [272] |
| <i>Escherichia</i> | <i>coli</i> | MC13-4              | 1    |  |      | 37 |     | 1 g/L glucose                    | [274] |
| <i>Escherichia</i> | <i>coli</i> | MC13-4              | 1.2  |  |      | 37 |     | 18.02 g/L glucose                | [274] |
| <i>Escherichia</i> | <i>coli</i> | MC13-4              | 1.25 |  |      | 37 |     | 18.02 g/L glucose 100 mM formate | [274] |

|                    |             |                   |      |      |      |    |           |                                  |       |
|--------------------|-------------|-------------------|------|------|------|----|-----------|----------------------------------|-------|
| <i>Escherichia</i> | <i>coli</i> | MC13-4            | 1.4  |      |      | 37 |           | 18.02 g/L glucose 1.5 mM formate | [274] |
| <i>Escherichia</i> | <i>coli</i> | MC13-4            | 0.38 |      |      | 37 | 6.5       | 18.02 g/L glucose 15 mM formate  | [275] |
| <i>Escherichia</i> | <i>coli</i> | MC4100            | 0.26 |      |      | 37 | 6.5       | glucose                          | [275] |
| <i>Escherichia</i> | <i>coli</i> | shufHycE12T366    |      |      | 2    | 37 |           | formate                          | [66]  |
| <i>Escherichia</i> | <i>coli</i> | shufHycE1-9       |      |      | 1.5  | 37 |           | formate                          | [66]  |
| <i>Escherichia</i> | <i>coli</i> | shufHycE19T366    |      |      | 1.8  | 37 |           | formate                          | [66]  |
| <i>Escherichia</i> | <i>coli</i> | TG1               |      |      | 0.26 | 37 |           |                                  | [67]  |
| <i>Escherichia</i> | <i>coli</i> | TG1 (recombinant) |      |      | 0.81 | 37 |           |                                  | [67]  |
| <i>Escherichia</i> | <i>coli</i> | Tikka             |      |      | 0.56 | 37 | 7.10      | glucose                          | [276] |
| <i>Escherichia</i> | <i>coli</i> | Tikka             |      |      | 3.37 | 37 | 6.38-6.40 | glucose                          | [276] |
| <i>Escherichia</i> | <i>coli</i> | Tikka             |      |      | 0.22 | 37 | 7.41      | glucose                          | [276] |
| <i>Escherichia</i> | <i>coli</i> | Tikka             |      |      | 0.28 | 37 | 7.60      | glucose                          | [276] |
| <i>Escherichia</i> | <i>coli</i> | Tikka             |      |      | 1.23 | 37 | 6.40      | pyruvate                         | [276] |
| <i>Escherichia</i> | <i>coli</i> | UNF3501           |      |      | 5.29 | 28 |           | glucose                          | [273] |
| <i>Escherichia</i> | <i>coli</i> | UNF3501           |      |      | 10.5 | 28 |           | formate                          | [273] |
| <i>Escherichia</i> | <i>coli</i> | UNF3501(pNG2)     |      |      | 6    | 28 |           | glucose                          | [273] |
| <i>Escherichia</i> | <i>coli</i> | UNF3501(pNG2)     |      |      | 11.9 | 28 |           | formate                          | [273] |
| <i>Escherichia</i> | <i>coli</i> | W3110             | 0.54 | 0.58 |      | 37 |           | glucose                          | [277] |
| <i>Escherichia</i> | <i>coli</i> | ZF1               | 0.63 | 0.87 |      | 37 |           | glucose                          | [277] |
| <i>Escherichia</i> | <i>coli</i> | ZF10              |      | 0.32 |      | 37 | 7.6       | glucose                          | [277] |
| <i>Escherichia</i> | <i>coli</i> | ZF11              |      | 0.45 |      | 37 | 7.6       | glucose                          | [277] |
| <i>Escherichia</i> | <i>coli</i> | ZF13              |      | 2.58 |      | 37 | 7.6       | glucose                          | [277] |
| <i>Escherichia</i> | <i>coli</i> | ZF14              |      | 0.05 |      | 37 | 7.6       | glucose                          | [277] |
| <i>Escherichia</i> | <i>coli</i> | ZF15              |      | 0.15 |      | 37 | 7.6       | glucose                          | [277] |
| <i>Escherichia</i> | <i>coli</i> | ZF16              |      | 0.16 |      | 37 | 7.6       | glucose                          | [277] |
| <i>Escherichia</i> | <i>coli</i> | ZF17              |      | 0.30 |      | 37 | 7.6       | glucose                          | [277] |
| <i>Escherichia</i> | <i>coli</i> | ZF2               | 0.70 | 0.71 |      | 37 |           | glucose                          | [277] |
| <i>Escherichia</i> | <i>coli</i> | ZF3               | 0.96 | 0.85 |      | 37 |           | glucose                          | [277] |

|                            |                       |             |      |      |        |    |         |                                |       |
|----------------------------|-----------------------|-------------|------|------|--------|----|---------|--------------------------------|-------|
| <i>Escherichia</i>         | <i>coli</i>           | ZF4         | 0.73 | 0.66 |        | 37 |         | glucose                        | [277] |
| <i>Escherichia</i>         | <i>coli</i>           | ZF5         |      | 0.51 |        | 37 |         | glucose                        | [277] |
| <i>Escherichia</i>         | <i>coli</i>           | ZF6         |      | 0.27 |        | 37 | 7.6     | glucose                        | [277] |
| <i>Escherichia</i>         | <i>coli</i>           | ZF7         |      | 1.56 |        | 37 | 7.6     | glucose                        | [277] |
| <i>Escherichia</i>         | <i>coli</i>           | ZF8         |      | 0.28 |        | 37 | 7.6     | glucose                        | [277] |
| <i>Escherichia</i>         | <i>coli</i>           | ZF9         |      | 0.29 |        | 37 | 7.6     | glucose                        | [277] |
| <i>Ethanoligenens</i>      | <i>harbinense</i>     | B49         |      | 27.7 | 2.83   | 35 | 6.0     | 10 g/L glucose                 | [42]  |
| <i>Ethanoligenens</i>      | <i>harbinense</i>     | B49         | 0.55 |      |        | 37 | 7.0     | 3 g/L glucose                  | [278] |
| <i>Ethanoligenens</i>      | <i>harbinense</i>     | B49         | 0.76 |      |        | 37 | 7.0     | 18 g/L glucose                 | [278] |
| <i>Ethanoligenens</i>      | <i>harbinense</i>     | B49         | 1.28 |      |        | 37 | 7.0     | 15 g/L glucose                 | [278] |
| <i>Ethanoligenens</i>      | <i>harbinense</i>     | B49         | 1.36 |      |        | 37 | 7.0     | 6 g/L glucose                  | [278] |
| <i>Ethanoligenens</i>      | <i>harbinense</i>     | B49         | 1.42 |      |        | 37 | 7.0     | 9 g/L glucose, 50 mM phosphate | [278] |
| <i>Ethanoligenens</i>      | <i>harbinense</i>     | B49         | 1.53 |      |        | 37 | 7.0     | 9 g/L glucose, 40 mM phosphate | [278] |
| <i>Ethanoligenens</i>      | <i>harbinense</i>     | B49         | 1.71 |      |        | 37 | 7.0     | 12 g/L glucose                 | [278] |
| <i>Ethanoligenens</i>      | <i>harbinense</i>     | B49         | 1.72 |      |        | 37 | 7.0     | 9 g/L glucose, 10 mM phosphate | [278] |
| <i>Ethanoligenens</i>      | <i>harbinense</i>     | B49         | 1.80 |      |        | 37 | 7.0     | 9 g/L glucose, 30 mM phosphate | [278] |
| <i>Ethanoligenens</i>      | <i>harbinense</i>     | B49         | 1.83 |      |        | 37 | 7.0     | 9 g/L glucose                  | [278] |
| <i>Ethanoligenens</i>      | <i>harbinense</i>     | B49         | 1.91 |      |        | 37 | 7.0     | 9 g/L glucose, 20 mM phosphate | [278] |
| <i>Ethanoligenens</i>      | <i>harbinense</i>     | B49         | 2.20 |      |        | 35 | 6.0     | 14.5 g/L glucose               | [83]  |
| <i>Ethanoligenens</i>      | <i>harbinense</i>     | YUAN-3      | 1.91 | 4.55 |        | 35 | 5.0     | glucose                        | [279] |
| <i>Fervidobacterium</i>    | <i>islandicum</i>     | DSM 5733    | 1.52 |      |        |    |         | glucose                        | [280] |
| <i>Fusibacter</i>          | <i>paucivorans</i>    | DSM 12116   | 0.72 |      |        | 37 | 7.3     | glucose, 20 mM thiosulphate    | [281] |
| <i>Fusibacter</i>          | <i>paucivorans</i>    | DSM 12116   | 3.04 |      |        | 37 | 7.3     | glucose                        | [281] |
| <i>Geobacter</i>           | <i>sulfurreducens</i> | PCA         |      |      | 0.0008 | 35 |         | acetate                        | [166] |
| <i>Haloanaerobacter</i>    | <i>chitinovorans</i>  | OGC 229     |      |      | 1.2    | 37 | 7.0     | glucose                        | [282] |
| <i>Haloanaerobacter</i>    | <i>chitinovorans</i>  | W3C1        |      |      | 1.23   | 37 | 7.0     | glucose                        | [282] |
| <i>Haloanaerobacterium</i> | <i>kushneri</i>       | ATCC 700103 | 0.52 |      |        | 40 | 6.5-7.5 | glucose                        | [283] |

|                            |                         |            |      |      |      |    |         |                                 |       |
|----------------------------|-------------------------|------------|------|------|------|----|---------|---------------------------------|-------|
| <i>Haloanaerobacterium</i> | <i>kushneri</i>         | VS-511     | 0.53 |      |      | 35 | 7.0     | glucose                         | [283] |
| <i>Haloanaerobacterium</i> | <i>kushneri</i>         | VS-732     | 0.48 |      |      | 35 | 6.5     | glucose                         | [283] |
| <i>Haloanaerobium</i>      | <i>saccharolyticum</i>  | DSM 6643   | 0.62 |      |      | 37 | 7.4     | glycerol                        | [284] |
| <i>Haloanaerobium</i>      | <i>saccharolyticum</i>  | DSM 6643   | 2.44 |      |      | 37 | 7       | glucose                         | [284] |
| <i>Haloanaerobium</i>      | <i>saccharolyticum</i>  | DSM 7779   | 1.61 |      |      | 37 | 7       | glycerol                        | [284] |
| <i>Haloanaerobium</i>      | <i>saccharolyticum</i>  | DSM 7779   | 2.17 |      |      | 37 | 7       | glucose                         | [284] |
| <i>Haloanerobium</i>       | <i>alcaliphilum</i>     | DSM 8275   | 0.09 |      |      | 37 | 6.7-7.0 | pyruvate                        | [285] |
| <i>Haloanerobium</i>       | <i>alcaliphilum</i>     | DSM 8275   | 0.26 |      |      | 37 | 6.7-7.0 | glucose                         | [285] |
| <i>Klebsiella</i>          | <i>oxytoca</i>          | HP1        | 0.12 | 6.76 | 2.7  | 38 | 7.0     | 200 mM glucose                  | [286] |
| <i>Klebsiella</i>          | <i>oxytoca</i>          | HP1        | 0.22 | 7.65 | 3.06 | 38 | 7.0     | 150 mM glucose                  | [286] |
| <i>Klebsiella</i>          | <i>oxytoca</i>          | HP1        | 0.36 | 8.96 | 3.58 | 38 | 7.0     | 100 mM glucose                  | [286] |
| <i>Klebsiella</i>          | <i>oxytoca</i>          | HP1        | 1.0  | 9.62 | 3.90 | 38 | 7.0     | 50 mM glucose                   | [286] |
| <i>Klebsiella</i>          | <i>oxytoca</i>          | HP1        | 1.5  | 8    |      | 38 | 7.0     | sucrose                         | [286] |
| <i>Klebsiella</i>          | <i>oxytoca</i>          | HP1        |      | 2.6  |      | 38 | 7.0     | maltose                         | [286] |
| <i>Klebsiella</i>          | <i>oxytoca</i>          | HP1        |      | 2    |      | 38 | 7.0     | starch                          | [286] |
| <i>Klebsiella</i>          | <i>pneumoniae</i>       |            | 14.8 |      |      | 37 | 6.9-7.0 | citrate, 36 $\mu$ M Ni          | [287] |
| <i>Klebsiella</i>          | <i>pneumoniae</i>       |            | 9.5  |      |      | 37 | 6.9-7.0 | citrate                         | [287] |
| <i>Klebsiella</i>          | sp.                     | HE1        | 0.2  |      | 0.45 | 37 | 7.5     | xylose (static incubation)      | [219] |
| <i>Klebsiella</i>          | sp.                     | HE1        | 0.2  |      | 0.45 | 37 | 7.5     | sucrose (static incubation)     | [219] |
| <i>Klebsiella</i>          | sp.                     | HE1        | 0.33 |      | 0.34 | 37 | 7.5     | xylose (incubation by shaking)  | [219] |
| <i>Klebsiella</i>          | sp.                     | HE1        | 0.5  |      | 0.67 | 37 | 7.5     | sucrose (incubation by shaking) | [219] |
| <i>Peptostreptococcus</i>  | <i>asaccharolyticus</i> | ATCC 14963 | 0.2  |      |      | 37 | 7.5     | glutamate                       | [207] |
| <i>Propionispora</i>       | <i>vibrioides</i>       | DSM 13305  | 0.86 |      |      | 37 | 7.5     | mannitol                        | [288] |
| <i>Propionispora</i>       | <i>vibrioides</i>       | DSM 13305  | 0.86 |      |      | 37 | 7.5     | fructose                        | [288] |
| <i>Propionispora</i>       | <i>vibrioides</i>       | DSM 13305  | 0.87 |      |      | 37 | 7.5     | xylitol                         | [288] |
| <i>Propionispora</i>       | <i>vibrioides</i>       | DSM 13305  | 1    |      |      | 37 | 7.5     | erythritol                      | [288] |
| <i>Pyrococcus</i>          | <i>furius</i>           | DSM 3638   |      |      | 2    | 98 | 7.0-    | yeast extract, tryptone         | [39]  |

|                     |               |           |           |  |       |    |     |                                                |           |
|---------------------|---------------|-----------|-----------|--|-------|----|-----|------------------------------------------------|-----------|
|                     |               |           |           |  |       |    | 7.2 |                                                |           |
| <i>Pyrococcus</i>   | <i>furius</i> | DSM3638   |           |  | 3.25  | 85 | 6.5 | keratin hydrolysate                            | [78]      |
| <i>Ruminococcus</i> | <i>albus</i>  | 7         | 0.79      |  |       | 37 | 7   | glucose                                        | [289]     |
| <i>Ruminococcus</i> | <i>albus</i>  | D-7       |           |  | 0.4   | 37 |     | cellulose                                      | [290]     |
| <i>Ruminococcus</i> | <i>albus</i>  | D-7       |           |  | 0.53  | 37 |     | cellulose, 40 mg palladium/charcoal in medium  | [290]     |
| <i>Ruminococcus</i> | <i>albus</i>  | D-7       |           |  | 0.09  | 37 |     | cellulose, 100 mg palladium/charcoal in medium | [290]     |
| <i>Ruminococcus</i> | <i>albus</i>  | D-7       |           |  | 0.42  | 37 |     | cellulose                                      | [290]     |
| <i>Ruminococcus</i> | <i>albus</i>  | D-7       |           |  | 0.28  | 37 |     | cellulose, 20 mg palladium above medium        | [290]     |
| <i>Ruminococcus</i> | <i>albus</i>  | D-7       |           |  | 0.009 | 37 |     | cellulose, 50 mg palladium above medium        | [290]     |
| <i>Ruminococcus</i> | <i>albus</i>  | DSM 20455 | 2.11      |  |       | 37 |     | 15 g/L glucose                                 | [291]     |
| <i>Ruminococcus</i> | <i>albus</i>  | DSM 20455 | 2.12      |  |       | 37 |     | 10 g/L glucose                                 | [291]     |
| <i>Ruminococcus</i> | <i>albus</i>  | DSM 20455 | 2.14      |  |       | 37 |     | 20 g/L glucose                                 | [291]     |
| <i>Ruminococcus</i> | <i>albus</i>  | DSM 20455 | 2.52      |  |       | 37 |     | 3 g/L glucose                                  | [291]     |
| <i>Ruminococcus</i> | <i>albus</i>  | DSM 20455 | 2.59      |  |       | 37 |     | sorghum residues                               | [291]     |
| <i>Ruminococcus</i> | <i>albus</i>  | DSM 20455 | 2.61      |  |       | 37 |     | sorghum extract                                | [291]     |
| <i>Ruminococcus</i> | <i>albus</i>  | DSM 20455 | 3.15      |  |       | 37 |     | sorghum stalks                                 | [291]     |
| <i>Ruminococcus</i> | <i>albus</i>  | DSM 20455 | 1.44      |  |       | 37 |     | arabinose                                      | [292]     |
| <i>Ruminococcus</i> | <i>albus</i>  | DSM 20455 | 2.07      |  |       | 37 |     | xylose                                         | [292]     |
| <i>Ruminococcus</i> | <i>albus</i>  | DSM 20455 | 2.10      |  |       | 37 |     | arabinose                                      | [292]     |
| <i>Ruminococcus</i> | <i>albus</i>  | DSM 20455 | 2.09-2.76 |  |       | 37 |     | 5 g/L glucose                                  | [291-293] |
| <i>Ruminococcus</i> | <i>albus</i>  | DSM 20455 | 5.59      |  |       | 37 |     | cellobiose                                     | [292]     |
| <i>Ruminococcus</i> | <i>albus</i>  | DSM 20455 | 1.72      |  |       | 37 |     | paperboard                                     | [293]     |
| <i>Ruminococcus</i> | <i>albus</i>  | DSM 20455 | 2.18      |  |       | 37 |     | paper tissue                                   | [293]     |
| <i>Ruminococcus</i> | <i>albus</i>  | DSM 20455 | 2.27      |  |       | 37 |     | office paper                                   | [293]     |
| <i>Ruminococcus</i> | <i>albus</i>  | DSM 20455 | 2.29      |  |       | 37 |     | magazine paper                                 | [293]     |
| <i>Ruminococcus</i> | <i>albus</i>  | DSM 20455 | 2.89      |  |       | 37 |     | newspaper                                      | [293]     |

|                           |                     |            |       |  |        |       |         |                        |       |
|---------------------------|---------------------|------------|-------|--|--------|-------|---------|------------------------|-------|
| <i>Ruminococcus</i>       | <i>albus</i>        |            | 2.57  |  |        |       |         | glucose                | [183] |
| <i>Ruminococcus</i>       | <i>flavefaciens</i> | C94        | 0.37  |  |        | 37    |         | cellulose              | [294] |
| <i>Ruminococcus</i>       | <i>flavefaciens</i> |            | 0.33  |  |        | 37    |         | cellulose              | [183] |
| <i>Ruminococcus</i>       | sp.                 | 18P13      | 0.422 |  |        | 37    |         | cellulose              | [266] |
| <i>Salmonella</i>         | <i>enterica</i>     | Gärtner    | 1     |  | 0.3    |       |         | formate                | [4]   |
| <i>Selenomonas</i>        | <i>ruminantium</i>  | GA31       |       |  | 0.0003 | 37    |         | glucose                | [182] |
| <i>Selenomonas</i>        | <i>ruminantium</i>  | HD1        |       |  | 0.0003 | 37    |         | glucose                | [182] |
| <i>Selenomonas</i>        | <i>ruminantium</i>  | HD4        | 2.04  |  |        | 37    | 7.0     | glucose                | [295] |
| <i>Selenomonas</i>        | <i>ruminantium</i>  | HD4        |       |  | 0.002  | 37    |         | glucose                | [182] |
| <i>Selenomonas</i>        | <i>ruminantium</i>  | PC18       |       |  | 0.002  | 37    |         | glucose                | [182] |
| <i>Spirochaeta</i>        | <i>aurantia</i>     | J3         | 1.025 |  |        | 30    | 7.5     | glucose                | [184] |
| <i>Spirochaeta</i>        | <i>aurantia</i>     | J4L        | 1.043 |  |        | 30    | 7.5     | glucose                | [184] |
| <i>Spirochaeta</i>        | <i>aurantia</i>     | J4T        | 1.23  |  |        | 30    | 7.5     | glucose                | [184] |
| <i>Spirochaeta</i>        | <i>aurantia</i>     | M1         | 0.968 |  |        | 30    | 7.5     | glucose                | [184] |
| <i>Spirochaeta</i>        | <i>aurantia</i>     | Vinzent    | 1.104 |  |        | 30    | 7.5     | glucose                | [184] |
| <i>Spirochaeta</i>        | <i>thermophila</i>  | DSM 6192   | 2.949 |  |        | 64-66 | 6.95    | glucose                | [296] |
| <i>Sporacetigenium</i>    | <i>mesophilum</i>   | DSM 16796  | 1.4   |  |        | 39    | 8.8     | glucose                | [297] |
| <i>Staphylothermus</i>    | <i>marinus</i>      | DSM 3639   |       |  | 0.026  | 85    | 6.5     | yeast extract, peptone | [298] |
| <i>Thermicanus</i>        | <i>aegypticus</i>   | DSM 12793  | 0.26  |  |        | 55-60 | 6.5-7.0 | cellobiose             | [299] |
| <i>Thermicanus</i>        | <i>aegypticus</i>   | DSM 12793  | 2.8   |  |        | 55-60 | 6.5-7.0 | glucose                | [299] |
| <i>Thermoanaerobacter</i> | <i>brockii</i>      | DSM 1457   | 0.53  |  |        | 65    | 7.5     | lactose                | [251] |
| <i>Thermoanaerobacter</i> | <i>ethanolicus</i>  | ATCC 31550 | 0.1   |  |        | 72    | 7.5     | glucose                | [300] |
| <i>Thermoanaerobacter</i> | <i>ethanolicus</i>  | DSM 2246   | 0.27  |  |        | 65    | 5.8-8.5 | lactose                | [251] |
| <i>Thermoanaerobacter</i> | <i>ethanolicus</i>  | DSM 2355   | 0.24  |  |        | 65    | 5.8-8.5 | lactose                | [251] |
| <i>Thermoanaerobacter</i> | <i>finnii</i>       | DSM 3389   | 0.59  |  |        | 65    | 6.5-6.8 | lactose                | [251] |
| <i>Thermoanaerobacter</i> | <i>finnii</i>       | DSM 3389   | 0.01  |  |        | 60    | 7.0     | glucose, thiosulphate  | [301] |
| <i>Thermoanaerobacter</i> | <i>finnii</i>       | DSM 3389   | 0.03  |  |        | 60    | 7.0     | xylose, thiosulphate   | [301] |

|                              |                              |           |      |      |       |       |         |                             |       |
|------------------------------|------------------------------|-----------|------|------|-------|-------|---------|-----------------------------|-------|
| <i>Thermoanaerobacter</i>    | <i>finnii</i>                | DSM 3389  | 0.12 |      |       | 60    | 7.0     | glucose                     | [301] |
| <i>Thermoanaerobacter</i>    | <i>finnii</i>                | DSM 3389  | 0.14 |      |       | 60    | 7.0     | xylose                      | [301] |
| <i>Thermoanaerobacter</i>    | <i>mathranii</i>             | DSM 11426 | 0.9  |      |       | 70-75 | 6.8-7.8 | xylose                      | [302] |
| <i>Thermoanaerobacter</i>    | sp.                          | DSM 9801  | 0.01 |      |       | 60    | 7.0     | glucose, thiosulphate       | [301] |
| <i>Thermoanaerobacter</i>    | sp.                          | DSM 9801  | 0.02 |      |       | 60    | 7.0     | xylose, thiosulphate        | [301] |
| <i>Thermoanaerobacter</i>    | sp.                          | DSM 9801  | 0.09 |      |       | 60    | 7.0     | glucose                     | [301] |
| <i>Thermoanaerobacter</i>    | sp.                          | DSM 9801  | 0.10 |      |       | 60    | 7.0     | xylose                      | [301] |
| <i>Thermoanaerobacter</i>    | <i>tengcongensis</i>         | JCM 11007 | 0.3  |      |       | 75    | 7.5     | glucose                     | [303] |
| <i>Thermoanaerobacter</i>    | <i>thermoanhydrolyticus</i>  | DSM 2247  | 0.34 |      |       | 65    | 6.9-7.5 | lactose                     | [251] |
| <i>Thermoanaerobacter</i>    | <i>thermoanhydrolyticus</i>  | DSM 567   | 3.67 |      |       | 65    | 6.9-7.5 | lactose                     | [251] |
| <i>Thermoanaerobacterium</i> | <i>thermosaccharolyticum</i> | DSM 571   | 7.44 |      |       | 60    | 7-8.5   | lactose                     | [251] |
| <i>Thermoanaerobacterium</i> | <i>thermosaccharolyticum</i> | PSU-2     | 0.73 |      |       |       |         | glucose, NH <sub>4</sub> Cl | [304] |
| <i>Thermoanaerobacterium</i> | <i>thermosaccharolyticum</i> | PSU-2     | 1.3  |      |       |       |         | starch, NH <sub>4</sub> Cl  | [304] |
| <i>Thermoanaerobacterium</i> | <i>thermosaccharolyticum</i> | PSU-2     | 1.75 |      |       |       |         | sucrose, NH <sub>4</sub> Cl | [304] |
| <i>Thermoanaerobacterium</i> | <i>thermosaccharolyticum</i> | PSU-2     | 2.43 |      |       |       |         | glucose, peptone            | [304] |
| <i>Thermoanaerobacterium</i> | <i>thermosaccharolyticum</i> | PSU-2     | 2.8  |      |       |       |         | starch, peptone             | [304] |
| <i>Thermoanaerobacterium</i> | <i>thermosaccharolyticum</i> | PSU-2     | 4.18 |      | 12.12 | 60    | 6.5     | 20 g/L sucrose              | [304] |
| <i>Thermoanaerobacterium</i> | <i>thermosaccharolyticum</i> | PSU-2     | 4.91 |      | 5.73  |       | 6.25    | 10 g/L sucrose              | [304] |
| <i>Thermoanaerobacterium</i> | <i>thermosaccharolyticum</i> | PSU-2     | 5.06 |      |       |       |         | 10 g/L sucrose, peptone     | [304] |
| <i>Thermoanaerobacterium</i> | <i>thermosaccharolyticum</i> | PSU-2     | 5.45 |      |       | 60    | 6.5     | 5 g/L sucrose               | [304] |
| <i>Thermoanaerobium</i>      | <i>brockii</i>               | HTD4      | 0.04 |      |       | 65    |         | pyruvate                    | [192] |
| <i>Thermoanaerobium</i>      | <i>brockii</i>               | HTD4      | 0.05 |      |       | 65    |         | glucose, 600 μmol acetone   | [192] |
| <i>Thermoanaerobium</i>      | <i>brockii</i>               | HTD4      | 0.09 |      |       | 65    |         | glucose 200 μmol acetone    | [192] |
| <i>Thermoanaerobium</i>      | <i>brockii</i>               | HTD4      | 0.3  |      |       | 65    |         | glucose                     | [192] |
| <i>Thermoanaerobium</i>      | <i>thermosaccharolyticum</i> | W16       | 2.19 | 8.84 | 10.7  | 60    | 7.0     | xylose                      | [305] |
| <i>Thermoanaerobium</i>      | <i>thermosaccharolyticum</i> | W16       | 2.23 | 9.03 | 11.2  | 60    | 7.0     | glucose/xylose (20/80)      | [305] |
| <i>Thermoanaerobium</i>      | <i>thermosaccharolyticum</i> | W16       | 2.32 | 9.62 | 12.5  | 60    | 7.0     | glucose/xylose (50/50)      | [305] |
| <i>Thermoanaerobium</i>      | <i>thermosaccharolyticum</i> | W16       | 2.37 | 9.7  | 12.7  | 60    | 7.0     | glucose/xylose (80/20)      | [305] |



|                           |                              |           |      |      |      |       |     |                                                                           |       |
|---------------------------|------------------------------|-----------|------|------|------|-------|-----|---------------------------------------------------------------------------|-------|
| <i>Thermoanaerobium</i>   | <i>thermosaccharolyticum</i> | W16       | 2.42 | 9.7  | 12.2 | 60    | 7.0 | glucose                                                                   | [305] |
| <i>Thermoanaerobium</i>   | <i>thermosaccharolyticum</i> | W16       | 2.4  |      | 12.7 | 60    | 7.0 | corn stover hydrolysate                                                   | [305] |
| <i>Thermoanaerovibrio</i> | <i>velox</i>                 | DSM 12556 | 0.7  |      |      | 60-65 | 7.3 | glucose                                                                   | [306] |
| <i>Thermobrachium</i>     | <i>celere</i>                | DSM 8682  | 1.64 |      |      | 67    | 8.2 | 25 mM glucose, yeast extract<br>50 mM phosphate                           | [194] |
| <i>Thermobrachium</i>     | <i>celere</i>                | DSM 8682  | 1.78 |      |      | 67    | 8.2 | 25 mM glucose, yeast extract                                              | [194] |
| <i>Thermobrachium</i>     | <i>celere</i>                | DSM 8682  | 2.04 |      |      | 67    | 8.2 | 25 mM glucose, yeast extract<br>25 mM phosphate                           | [194] |
| <i>Thermobrachium</i>     | <i>celere</i>                | DSM 8682  | 2.49 |      |      | 67    | 8.2 | 50 mM glucose, 1 mM<br>FeSO <sub>4</sub>                                  | [194] |
| <i>Thermobrachium</i>     | <i>celere</i>                | DSM 8682  | 2.60 |      |      | 67    | 8.2 | 50 mM glucose, 10 mM<br>FeSO <sub>4</sub>                                 | [194] |
| <i>Thermobrachium</i>     | <i>celere</i>                | DSM 8682  | 2.67 |      |      | 67    | 8.2 | 25 mM glucose, yeast extract<br>12.5 mM phosphate                         | [194] |
| <i>Thermobrachium</i>     | <i>celere</i>                | DSM 8682  | 2.83 |      |      | 67    | 8.2 | 50 mM glucose, 25 mM<br>FeSO <sub>4</sub>                                 | [194] |
| <i>Thermobrachium</i>     | <i>celere</i>                | DSM 8682  | 2.87 |      |      | 67    | 8.2 | 50 mM glucose, 50 mM<br>FeSO <sub>4</sub>                                 | [194] |
| <i>Thermobrachium</i>     | <i>celere</i>                | DSM 8682  | 2.93 |      |      | 67    | 8.2 | 50 mM glucose, 100 mM<br>FeSO <sub>4</sub>                                | [194] |
| <i>Thermobrachium</i>     | <i>celere</i>                | DSM 8682  | 3.08 |      |      | 67    | 8.2 | 50 mM glucose, 200 mM<br>FeSO <sub>4</sub>                                | [194] |
| <i>Thermococcus</i>       | <i>litoralis</i>             | DSM 5473  |      |      | 3.25 | 85    | 6.5 | keratin hydrolysate                                                       | [78]  |
| <i>Thermococcus</i>       | <i>litoralis</i>             | DSM 5473  |      |      | 4.70 | 85    | 6.5 | 5% (w/v) peptone                                                          | [78]  |
| <i>Thermococcus</i>       | <i>litoralis</i>             | DSM 5473  |      |      | 6.75 | 85    | 6.5 | 10% (w/v) peptone                                                         | [78]  |
| <i>Thermosipho</i>        | <i>africanus</i>             | DSM 3509  | 2.33 |      |      |       |     | glucose                                                                   | [280] |
| <i>Thermotoga</i>         | <i>elfii</i>                 |           | 2.8  |      |      |       |     | glucose                                                                   | [280] |
| <i>Thermotoga</i>         | <i>maritima</i>              | DSM 3109  | 3.4  | 0.24 | 1.45 | 80    |     | xylose                                                                    | [307] |
| <i>Thermotoga</i>         | <i>maritima</i>              | DSM 3109  | 3.8  | 0.21 | 1.24 | 80    |     | glucose                                                                   | [307] |
| <i>Thermotoga</i>         | <i>maritima</i>              | DSM 3109  | 3.8  | 0.24 | 0.97 | 80    |     | arabinose                                                                 | [307] |
| <i>Thermotoga</i>         | <i>maritima</i>              | DSM 3109  | 0.3  |      |      | 80    |     | 12 mM glucose, elemental<br>sulphur (headspace to liquid<br>ratio 11.5:1) | [308] |
| <i>Thermotoga</i>         | <i>maritima</i>              | DSM 3109  | 0.5  |      |      | 80    |     | 12 mM glucose, elemental<br>sulphur (headspace to liquid<br>ratio 2:1)    | [308] |

|                                          |                                              |           |      |      |      |    |         |                                                  |       |
|------------------------------------------|----------------------------------------------|-----------|------|------|------|----|---------|--------------------------------------------------|-------|
| <i>Thermotoga</i>                        | <i>maritima</i>                              | DSM 3109  | 2    |      |      | 80 |         | 15 mM glucose (headspace to liquid ratio 2:1)    | [308] |
| <i>Thermotoga</i>                        | <i>maritima</i>                              | DSM 3109  | 4    |      |      | 80 |         | 12 mM glucose (headspace to liquid ratio 11.5:1) | [308] |
| <i>Thermotoga</i>                        | <i>maritima</i>                              | DSM 3109  | 1.67 |      | 8.2  | 80 | 6.5-7.0 | 7.5% (w/v) glucose                               | [198] |
| <i>Thermotoga</i>                        | <i>naphthophila</i>                          | DSM13996  | 3.96 |      |      | 80 | 7.0     | glucose                                          | [309] |
| <i>Thermotoga</i>                        | <i>neapolitana</i>                           | DSM 4359  | 1.84 |      | 8.7  | 75 | 6.5-7.0 | 7.5% (w/v) glucose                               | [198] |
| <i>Thermotoga</i>                        | <i>neapolitana</i>                           | DSM 4359  | 2.04 |      | 0.05 | 60 | 7.5     | 14 mM glucose                                    | [310] |
| <i>Thermotoga</i>                        | <i>neapolitana</i>                           | DSM 4359  | 3.09 |      | 0.27 | 65 | 7.5     | 14 mM glucose                                    | [310] |
| <i>Thermotoga</i>                        | <i>neapolitana</i>                           | DSM 4359  | 3.18 |      | 0.47 | 70 | 7.5     | 14 mM glucose                                    | [310] |
| <i>Thermotoga</i>                        | <i>neapolitana</i>                           | DSM 4359  | 3.75 |      | 0.8  | 85 | 7.5     | 14 mM glucose                                    | [310] |
| <i>Thermotoga</i>                        | <i>neapolitana</i>                           | DSM 4359  | 4.11 |      |      | 77 | 7.5     | 14 mM glucose                                    | [310] |
| <i>Thermotoga</i>                        | <i>neapolitana</i>                           | DSM 4359  | 2.7  | 1.67 | 0.42 | 80 |         | xylose                                           | [307] |
| <i>Thermotoga</i>                        | <i>neapolitana</i>                           | DSM 4359  | 3.2  | 4.17 | 0.61 | 80 |         | glucose                                          | [307] |
| <i>Thermotoga</i>                        | <i>neapolitana</i>                           | DSM 4359  | 3.2  | 2.08 | 0.59 | 80 |         | arabinose                                        | [307] |
| <i>Thermotoga</i>                        | <i>neapolitana</i>                           | DSM 4359  | 3.8  |      |      | 80 |         | glucose, malonic acid                            | [311] |
| <i>Thermotoga</i>                        | <i>neapolitana</i>                           | DSM 4359  | 1.41 |      |      | 77 | 7.5     | xylose                                           | [312] |
| <i>Thermotoga</i>                        | <i>neapolitana</i>                           | DSM 4359  | 1.82 |      |      | 77 | 7.5     | glucose                                          | [312] |
| <i>Thermotoga</i>                        | <i>neapolitana</i>                           | DSM 4359  | 2.20 |      |      | 77 | 7.5     | xylose (nitrogen sparging)                       | [312] |
| <i>Thermotoga</i>                        | <i>neapolitana</i>                           | DSM 4359  | 3.24 |      |      | 77 | 7.5     | glucose (nitrogen sparging)                      | [312] |
| <i>Thermotoga</i>                        | <i>neapolitana</i>                           |           | 2.26 |      |      |    |         | glucose                                          | [280] |
| <i>Thermotoga</i>                        | <i>neapolitana</i>                           |           |      |      | 0.29 | 70 | 8.5     | starch                                           | [313] |
| <i>Thermotoga</i>                        | <i>neapolitana</i>                           |           |      |      | 0.19 | 70 | 8.5     | glucose                                          | [313] |
| <i>Thermotoga</i>                        | <i>petrophila</i>                            | DSM13995  | 3.74 |      |      | 80 | 7.0     | glucose                                          | [309] |
| <i>Thermotoga</i>                        | sp.                                          | SEBR 2665 | 2.76 |      |      |    |         | glucose                                          | [280] |
| <i>Thermotoga</i>                        | sp.                                          | SEBR 7054 | 3.38 |      |      |    |         | glucose                                          | [280] |
| <i>Victivallis</i>                       | <i>vadensis</i>                              | DSM 14823 | 1.46 |      |      | 37 | 6.5     | glucose                                          | [314] |
| <i>Clostridium</i><br><i>Bacillus</i>    | <i>butyricum</i><br><i>thermoamylovorans</i> | M1<br>I   |      |      | 0.2  | 40 |         | brewery yeast waste                              | [227] |
| <i>Clostridium</i><br><i>Clostridium</i> | sp.<br><i>butyricum</i>                      | R1        | 2.6  |      |      | 30 | 6.0     | cellobiose                                       | [230] |

|                                                    |                                                     |             |     |  |  |    |  |                            |       |
|----------------------------------------------------|-----------------------------------------------------|-------------|-----|--|--|----|--|----------------------------|-------|
| <i>Clostridium</i><br><i>Thermoanaerobacterium</i> | <i>thermocellum</i><br><i>thermosaccharolyticum</i> | JN4<br>GD17 | 1.8 |  |  | 60 |  | microcrystalline cellulose | [142] |
|----------------------------------------------------|-----------------------------------------------------|-------------|-----|--|--|----|--|----------------------------|-------|

<sup>+</sup> for reference please refer to manuscript
