# Supplementary material for: A comprehensive and quantitative review of dark fermentative biohydrogen production
Source: PubMed Central journal article supplement (PMC3443015; doi:10.1186/1475-2859-11-115), 2012-08-27
Supplement: 1475-2859-11-115-S3.pdf [file 1475-2859-11-115-S3.pdf]

**Additional file 3: Batch dark fermentative biohydrogen production**

| Genus              | Species                | Strain     | $Y_{(H_2/S)}$<br>[mol mol <sup>-1</sup> ] | $q_{H_2}$<br>[mmol g <sup>-1</sup> h <sup>-1</sup> ] | HER<br>[mmol L <sup>-1</sup> h <sup>-1</sup> ] | Temperature<br>[°C] | pH  | Main substrate and<br>discriminative<br>condition | Reference <sup>+</sup> |
|--------------------|------------------------|------------|-------------------------------------------|------------------------------------------------------|------------------------------------------------|---------------------|-----|---------------------------------------------------|------------------------|
| <i>Alcaligenes</i> | <i>eutrophus</i>       | ATCC 17699 |                                           |                                                      | 4.6                                            | 25                  | 7.2 | formate (free cells)                              | [315]                  |
| <i>Alcaligenes</i> | <i>eutrophus</i>       | ATCC 17699 |                                           |                                                      | 5.8                                            | 25                  | 7.2 | formate (cells<br>immobilized in<br>carrageenan)  | [315]                  |
| <i>Alcaligenes</i> | <i>eutrophus</i>       | DSM 1347   |                                           |                                                      | 6.38                                           | 30                  | 6.0 | gluconate                                         | [90]                   |
| <i>Alcaligenes</i> | <i>eutrophus</i>       | DSM 515    |                                           |                                                      | 14.1                                           | 30                  | 6.0 | gluconate                                         | [90]                   |
| <i>Alcaligenes</i> | <i>eutrophus</i>       | DSM 518    |                                           |                                                      | 22                                             | 30                  | 6.0 | fructose                                          | [90]                   |
| <i>Alcaligenes</i> | <i>eutrophus</i>       | DSM 518    |                                           |                                                      | 16.3                                           | 30                  | 6.0 | gluconate                                         | [90]                   |
| <i>Alcaligenes</i> | <i>eutrophus</i>       | DSM 518    |                                           |                                                      | 7.7                                            | 30                  | 6.0 | lactate                                           | [90]                   |
| <i>Alcaligenes</i> | <i>eutrophus</i>       | HF08       |                                           |                                                      | 0.44                                           | 30                  | 6.0 | gluconate                                         | [90]                   |
| <i>Alcaligenes</i> | <i>hydrogenophilus</i> | M201       |                                           |                                                      | 0.66                                           | 30                  | 6.0 | gluconate                                         | [90]                   |
| <i>Bacillus</i>    | <i>cereus</i>          | EGU3       | 0.45                                      |                                                      |                                                | 40                  | 7.0 | glucose                                           | [316]                  |
| <i>Bacillus</i>    | <i>cereus</i>          | EGU41      | 0.60                                      |                                                      |                                                | 40                  | 7.0 | glucose                                           | [316]                  |
| <i>Bacillus</i>    | <i>cereus</i>          | EGU43      | 0.63                                      |                                                      |                                                | 40                  | 7.0 | glucose                                           | [316]                  |
| <i>Bacillus</i>    | <i>cereus</i>          | EGU44      | 0.53                                      |                                                      |                                                | 40                  | 7.0 | glucose                                           | [316]                  |
| <i>Bacillus</i>    | <i>cereus</i>          | EGU46      | 0.38                                      |                                                      |                                                | 40                  | 7.0 | glucose                                           | [316]                  |
| <i>Bacillus</i>    | <i>cereus</i>          | EGU48      | 0.50                                      |                                                      |                                                | 40                  | 7.0 | glucose                                           | [316]                  |
| <i>Bacillus</i>    | <i>coagulans</i>       | IIT-BT S1  |                                           |                                                      | 4.95                                           | 37                  | 6.0 | glucose                                           | [317]                  |
| <i>Bacillus</i>    | <i>coagulans</i>       | IIT-BT S1  | 2.5                                       |                                                      |                                                | 37                  | 6.5 | xylose                                            | [317]                  |
| <i>Bacillus</i>    | <i>coagulans</i>       | IIT-BT S1  | 1.9                                       |                                                      |                                                | 37                  | 6.5 | galactose                                         | [317]                  |
| <i>Bacillus</i>    | <i>coagulans</i>       | IIT-BT S1  | 2.55                                      |                                                      |                                                | 37                  | 6.5 | 1.5% (w/v) glucose                                | [317]                  |
| <i>Bacillus</i>    | <i>coagulans</i>       | IIT-BT S1  |                                           |                                                      | 11.6                                           | 37                  | 6.5 | 2% /w/v) glucose                                  | [317]                  |
| <i>Bacillus</i>    | <i>coagulans</i>       | IIT-BT S1  |                                           |                                                      | 11.82                                          | 37                  | 6.5 | 1% (w/v) glucose                                  | [317]                  |
| <i>Bacillus</i>    | <i>coagulans</i>       | IIT-BT S1  | 2.13                                      |                                                      |                                                | 37                  | 6.5 | glycerol                                          | [317]                  |
| <i>Bacillus</i>    | <i>coagulans</i>       | IIT-BT S1  | 2.6                                       |                                                      |                                                | 37                  | 6.5 | lactose                                           | [317]                  |
| <i>Bacillus</i>    | <i>coagulans</i>       | IIT-BT S1  | 2.75                                      |                                                      |                                                | 37                  | 6.5 | maltose                                           | [317]                  |

|                 |                      |           |           |  |  |    |     |                                                |       |
|-----------------|----------------------|-----------|-----------|--|--|----|-----|------------------------------------------------|-------|
| <i>Bacillus</i> | <i>coagulans</i>     | IIT-BT S1 | 2         |  |  | 37 | 6.5 | mannose                                        | [317] |
| <i>Bacillus</i> | <i>coagulans</i>     | IIT-BT S1 | 2.5       |  |  | 37 | 6.5 | starch                                         | [317] |
| <i>Bacillus</i> | <i>coagulans</i>     | IIT-BT S1 | 3.2       |  |  | 37 | 6.5 | sucrose                                        | [317] |
| <i>Bacillus</i> | <i>licheniformis</i> | EGU14     | 0.16      |  |  | 40 | 7.0 | glucose                                        | [316] |
| <i>Bacillus</i> | <i>licheniformis</i> | EGU90     | 0.44      |  |  | 40 | 7.0 | glucose                                        | [316] |
| <i>Bacillus</i> | <i>licheniformis</i> | JK1       | 0.58      |  |  | 40 | 7.0 | glucose (free cells)                           | [96]  |
| <i>Bacillus</i> | <i>licheniformis</i> | JK1       | 0.54-0.71 |  |  | 40 | 7.0 | glucose (cells immobilized in sodium alginate) | [96]  |
| <i>Bacillus</i> | <i>licheniformis</i> | JK1       | 0.76      |  |  | 40 | 7.0 | glucose (cells immobilized in brick dust)      | [96]  |
| <i>Bacillus</i> | <i>licheniformis</i> | JK1       | 1.12      |  |  | 40 | 7.0 | glucose                                        | [96]  |
| <i>Bacillus</i> | <i>licheniformis</i> | JK1       | 1.38      |  |  | 40 | 7.0 | glucose                                        | [96]  |
| <i>Bacillus</i> | <i>pumilus</i>       | EGU49     | 0.45      |  |  | 40 | 7.0 | glucose                                        | [316] |
| <i>Bacillus</i> | sp.                  | EGU15     | 0.31      |  |  | 40 | 7.0 | glucose                                        | [316] |
| <i>Bacillus</i> | sp.                  | EGU367    | 0.33      |  |  | 40 | 7.0 | glucose                                        | [316] |
| <i>Bacillus</i> | sp.                  | EGU444    | 0.35      |  |  | 40 | 7.0 | glucose                                        | [316] |
| <i>Bacillus</i> | sp.                  | EGU445    | 0.42      |  |  | 40 | 7.0 | glucose                                        | [316] |
| <i>Bacillus</i> | sp.                  | EGU447    | 0.36      |  |  | 40 | 7.0 | glucose                                        | [316] |
| <i>Bacillus</i> | sp.                  | EGU85     | 0.40      |  |  | 40 | 7.0 | glucose                                        | [316] |
| <i>Bacillus</i> | sp.                  | EGU91     | 0.60      |  |  | 40 | 7.0 | glucose                                        | [316] |
| <i>Bacillus</i> | sp.                  | MTCC 297  | 0.23      |  |  | 32 | 7.0 | bagasse                                        | [318] |
| <i>Bacillus</i> | <i>sphaericus</i>    | EGU385    | 0.33      |  |  | 40 | 7.0 | glucose                                        | [316] |
| <i>Bacillus</i> | <i>sphaericus</i>    | EGU399    | 0.29      |  |  | 40 | 7.0 | glucose                                        | [316] |
| <i>Bacillus</i> | <i>sphaericus</i>    | EGU542    | 0.42      |  |  | 40 | 7.0 | glucose                                        | [316] |
| <i>Bacillus</i> | <i>subtilis</i>      | EGU163    | 0.28      |  |  | 40 | 7.0 | glucose                                        | [316] |
| <i>Bacillus</i> | <i>subtilis</i>      | EGU17     | 0.52      |  |  | 40 | 7.0 | glucose                                        | [316] |
| <i>Bacillus</i> | <i>subtilis</i>      | EGU475    | 0.34      |  |  | 40 | 7.0 | glucose                                        | [316] |
| <i>Bacillus</i> | <i>thuringiensis</i> | EGU378    | 0.26      |  |  | 40 | 7.0 | glucose                                        | [316] |
| <i>Bacillus</i> | <i>thuringiensis</i> | EGU45     | 0.63      |  |  | 40 | 7.0 | glucose                                        | [316] |

|                             |                        |           |      |       |      |    |     |                                        |       |
|-----------------------------|------------------------|-----------|------|-------|------|----|-----|----------------------------------------|-------|
| <i>Bacillus</i>             | <i>thuringiensis</i>   | EGU47     | 0.48 |       |      | 40 | 7.0 | glucose                                | [316] |
| <i>Bordetella</i>           | <i>avium</i>           | EGU31     | 0.58 |       |      | 40 | 7.0 | glucose                                | [316] |
| <i>Caldicellulosiruptor</i> | <i>kristjanssonii</i>  | DSM 12137 | 2.6  | 15    | 17   | 70 | 6.5 | glucose/xylose                         | [49]  |
| <i>Caldicellulosiruptor</i> | <i>owensensis</i>      | DSM 13100 | 2.7  | 21    | 17   | 70 | 6.5 | glucose/xylose                         | [49]  |
| <i>Caldicellulosiruptor</i> | <i>owensensis</i>      | DSM 13100 | 3.8  |       | 15   | 70 | 6.7 | glucose/yeast extract                  | [319] |
| <i>Caldicellulosiruptor</i> | <i>owensensis</i>      | DSM 13100 | 4.0  |       | 17   | 70 | 6.7 | glucose/vitamins                       | [319] |
| <i>Caldicellulosiruptor</i> | <i>owensensis</i>      | DSM 13100 | 2.7  |       | 9    | 70 | 6.7 | xylose/yeast extract                   | [319] |
| <i>Caldicellulosiruptor</i> | <i>owensensis</i>      | DSM 13100 | 3.5  |       | 19   | 70 | 6.7 | xylose/vitamins                        | [319] |
| <i>Caldicellulosiruptor</i> | <i>saccharolyticus</i> | DSM 8903  | 3.0  | 32    | 17   | 70 | 6.5 | glucose/xylose                         | [49]  |
| <i>Caldicellulosiruptor</i> | <i>saccharolyticus</i> | DSM 8903  | 6.6  | 11.7  | 8.4  | 70 | 7   | sucrose                                | [57]  |
| <i>Caldicellulosiruptor</i> | <i>saccharolyticus</i> | DSM 8903  | 2.7  | 22    | 12   | 71 | 6.5 | glucose (CO <sub>2</sub> sparging)     | [28]  |
| <i>Caldicellulosiruptor</i> | <i>saccharolyticus</i> | DSM 8903  | 3.0  | 20.4  | 20   | 71 | 6.5 | glucose (N <sub>2</sub> sparging)      | [28]  |
| <i>Caldicellulosiruptor</i> | <i>saccharolyticus</i> | DSM 8903  | 2.7  |       | 23   | 71 | 6.5 | sucrose (N <sub>2</sub> sparging)      | [28]  |
| <i>Caldicellulosiruptor</i> | <i>saccharolyticus</i> | DSM 8903  | 3.1  | 14    | 11.8 | 71 | 6.5 | sucrose (CO <sub>2</sub> sparging)     | [28]  |
| <i>Caldicellulosiruptor</i> | <i>saccharolyticus</i> | DSM 8903  | 2.4  |       | 9.7  | 72 | 6.8 | 28 g/L glucose/xylose                  | [320] |
| <i>Caldicellulosiruptor</i> | <i>saccharolyticus</i> | DSM 8903  | 3.3  |       | 13   | 72 | 6.8 | 14 g/L glucose/xylose                  | [320] |
| <i>Caldicellulosiruptor</i> | <i>saccharolyticus</i> | DSM 8903  | 3.4  |       | 12   | 72 | 6.8 | 10 g/L glucose/xylose                  | [320] |
| <i>Caldicellulosiruptor</i> | <i>saccharolyticus</i> | DSM 8903  | 2.4  |       | 6.2  | 80 | 6.8 | 28 g/L Miscanthus biomass              | [320] |
| <i>Caldicellulosiruptor</i> | <i>saccharolyticus</i> | DSM 8903  | 3.3  |       | 10.4 | 80 | 6.8 | 14 g/L Miscanthus biomass              | [320] |
| <i>Caldicellulosiruptor</i> | <i>saccharolyticus</i> | DSM 8903  | 3.4  |       | 12.6 | 80 | 6.8 | 10g/L Miscanthus biomass               | [320] |
| <i>Caldicellulosiruptor</i> | <i>saccharolyticus</i> | DSM 8903  | 2.8  | 10.81 | 9.4  | 72 | 6.8 | 20 g/L glucose, xylose, sucrose        | [321] |
| <i>Caldicellulosiruptor</i> | <i>saccharolyticus</i> | DSM 8903  | 3.2  | 12.02 | 10.7 | 72 | 6.8 | 10 g/L glucose, xylose, sucrose        | [321] |
| <i>Caldicellulosiruptor</i> | <i>saccharolyticus</i> | DSM 8903  | 1.3  | 13.42 | 10.2 | 72 | 6.8 | 20 g/L sweet shorgum barge hydrolysate | [321] |
| <i>Caldicellulosiruptor</i> | <i>saccharolyticus</i> | DSM 8903  | 2.6  | 16.83 | 10.6 | 72 | 6.8 | 10 g/L sweet shorgum barge hydrolysate | [321] |
| <i>Caldicellulosiruptor</i> | <i>saccharolyticus</i> | DSM 8903  | 2.8  |       | 12.9 | 72 | 6.9 | 30 g/L glucose                         | [322] |

|                             |                        |             |           |  |         |    |     |                                                                                             |       |
|-----------------------------|------------------------|-------------|-----------|--|---------|----|-----|---------------------------------------------------------------------------------------------|-------|
| <i>Caldicellulosiruptor</i> | <i>saccharolyticus</i> | DSM 8903    | 3.4       |  | 12      | 72 | 6.9 | 10 g/L glucose                                                                              | [322] |
| <i>Caldicellulosiruptor</i> | <i>saccharolyticus</i> | DSM 8903    | 1.7       |  | 10.2    | 72 | 6.9 | hydrolyzed potato steam peels (30-40 g/L glucose equivalents), one enzyme for pretreatment  | [322] |
| <i>Caldicellulosiruptor</i> | <i>saccharolyticus</i> | DSM 8903    | 1.7       |  | 9.3     | 72 | 6.9 | hydrolyzed potato steam peels (30-40 g/L glucose equivalents), two enzymes for pretreatment | [322] |
| <i>Caldicellulosiruptor</i> | <i>saccharolyticus</i> | DSM 8903    | 2.4       |  | 16.4    | 72 | 6.9 | hydrolyzed potato steam peels (12-14 g/L glucose equivalents), one enzyme for pretreatment  | [322] |
| <i>Caldicellulosiruptor</i> | <i>saccharolyticus</i> | DSM 8903    | 3.4       |  | 13.3    | 72 | 6.9 | hydrolyzed potato steam peels (12-14 g/L glucose equivalents), two enzymes for pretreatment | [322] |
| <i>Caldicellulosiruptor</i> | <i>saccharolyticus</i> | DSM 8903    | 1.1       |  | 3.9     | 72 | 6.9 | untreated potato steam peels (516 g wet weight)                                             | [322] |
| <i>Caldicellulosiruptor</i> | <i>saccharolyticus</i> | DSM 8903    | 3.5       |  | 13.1    | 72 | 6.9 | untreated potato steam peels (172 g wet weight)                                             | [322] |
| <i>Caldicellulosiruptor</i> | <i>saccharolyticus</i> |             | 2.53      |  | 10.7    | 70 | 6.4 | glucose                                                                                     | [79]  |
| <i>Caldicellulosiruptor</i> | <i>saccharolyticus</i> |             | 2.32      |  | 9.2     | 70 | 6.4 | glucose/xylose                                                                              | [79]  |
| <i>Caldicellulosiruptor</i> | <i>saccharolyticus</i> |             | 1.96-3.56 |  | 5.3-6.0 | 70 | 6.4 | paper sludge hydrolysate                                                                    | [79]  |
| <i>Caldicellulosiruptor</i> | <i>saccharolyticus</i> |             | 2.01      |  | 5.3     | 70 | 6.4 | paper sludge hydrolysate, yeast extract                                                     | [79]  |
| <i>Caldicellulosiruptor</i> | <i>saccharolyticus</i> |             | 2.24      |  | 11.3    | 70 | 6.4 | xylose                                                                                      | [79]  |
| <i>Clostridium</i>          | <i>acetobutylicum</i>  | NBRC 13948  |           |  | 1.83    | 30 | 6.6 | glucose                                                                                     | [81]  |
| <i>Clostridium</i>          | <i>acetobutylicum</i>  | NCIMB 13357 | 2.87      |  |         | 30 | 4.0 | glucose                                                                                     | [323] |

|                    |                       |             |           |  |  |    |     |                                         |       |
|--------------------|-----------------------|-------------|-----------|--|--|----|-----|-----------------------------------------|-------|
| <i>Clostridium</i> | <i>acetobutylicum</i> | NCIMB 13357 | 2.61      |  |  | 30 | 4.5 | glucose                                 | [323] |
| <i>Clostridium</i> | <i>acetobutylicum</i> | NCIMB 13357 | 2.61      |  |  | 30 | 5.0 | glucose                                 | [323] |
| <i>Clostridium</i> | <i>acetobutylicum</i> | NCIMB 13357 | 2.44      |  |  | 30 | 5.5 | glucose                                 | [323] |
| <i>Clostridium</i> | <i>acetobutylicum</i> | NCIMB 13357 | 3.08      |  |  | 30 | 6.0 | glucose                                 | [323] |
| <i>Clostridium</i> | <i>acetobutylicum</i> | NCIMB 13357 | 2.97      |  |  | 30 | 6.5 | glucose                                 | [323] |
| <i>Clostridium</i> | <i>acetobutylicum</i> | NCIMB 13357 | 2.85-3.14 |  |  | 30 | 7.0 | 5 g/L glucose                           | [324] |
| <i>Clostridium</i> | <i>acetobutylicum</i> | NCIMB 13357 | 3.03      |  |  | 30 | 7.0 | 5 g/L glucose, 50 mg/L NaCl             | [324] |
| <i>Clostridium</i> | <i>acetobutylicum</i> | NCIMB 13357 | 3.01      |  |  | 30 | 7.0 | 5 g/L glucose, 100 mg/L NaCl            | [324] |
| <i>Clostridium</i> | <i>acetobutylicum</i> | NCIMB 13357 | 3.04      |  |  | 30 | 7.0 | 5 g/L glucose, 250 mg/L NaCl            | [324] |
| <i>Clostridium</i> | <i>acetobutylicum</i> | NCIMB 13357 | 3.07      |  |  | 30 | 7.0 | 5 g/L glucose, 500 mg/L NaCl            | [324] |
| <i>Clostridium</i> | <i>acetobutylicum</i> | NCIMB 13357 | 3.10      |  |  | 30 | 7.0 | 5 g/L glucose, 1000 mg/L NaCl           | [324] |
| <i>Clostridium</i> | <i>acetobutylicum</i> | NCIMB 13357 | 3.08      |  |  | 30 | 7.0 | 5 g/L glucose, 2500 mg/L NaCl           | [324] |
| <i>Clostridium</i> | <i>acetobutylicum</i> | NCIMB 13357 | 3.08      |  |  | 30 | 7.0 | 5 g/L glucose, 5000 mg/L NaCl           | [324] |
| <i>Clostridium</i> | <i>acetobutylicum</i> | NCIMB 13357 | 2.85      |  |  | 30 | 7.0 | 5 g/L glucose, 50 mg/L sodium acetate   | [324] |
| <i>Clostridium</i> | <i>acetobutylicum</i> | NCIMB 13357 | 2.80      |  |  | 30 | 7.0 | 55 g/L glucose, 100 mg/L sodium acetate | [324] |
| <i>Clostridium</i> | <i>acetobutylicum</i> | NCIMB 13357 | 2.77      |  |  | 30 | 7.0 | 5 g/L glucose, 200 mg/L sodium acetate  | [324] |
| <i>Clostridium</i> | <i>acetobutylicum</i> | NCIMB 13357 | 2.70      |  |  | 30 | 7.0 | 5 g/L glucose, 500 mg/L sodium acetate  | [324] |
| <i>Clostridium</i> | <i>acetobutylicum</i> | NCIMB 13357 | 2.81      |  |  | 30 | 7.0 | 5 g/L glucose, 1000 mg/L sodium acetate | [324] |
| <i>Clostridium</i> | <i>acetobutylicum</i> | NCIMB 13357 | 2.81      |  |  | 30 | 7.0 | 5 g/L glucose, 1500 mg/L sodium acetate | [324] |
| <i>Clostridium</i> | <i>acetobutylicum</i> | NCIMB 13357 | 2.81      |  |  | 30 | 7.0 | 5 g/L glucose, 3000 mg/L sodium acetate | [324] |
| <i>Clostridium</i> | <i>acetobutylicum</i> | NCIMB 13357 | 2.93      |  |  | 30 | 7.0 | 1 g/L glucose                           | [323] |
| <i>Clostridium</i> | <i>acetobutylicum</i> | NCIMB 13357 | 3.00      |  |  | 30 | 7.0 | 3 g/L glucose, 50 mg/L NaCl             | [323] |
| <i>Clostridium</i> | <i>acetobutylicum</i> | NCIMB 13357 | 2.69      |  |  | 30 | 7.0 | 7 g/L glucose, 50 mg/L NaCl             | [323] |

|                    |                       |             |      |  |      |    |       |                                    |       |
|--------------------|-----------------------|-------------|------|--|------|----|-------|------------------------------------|-------|
| <i>Clostridium</i> | <i>acetobutylicum</i> | NCIMB 13357 | 2.60 |  |      | 30 | 7.0   | 10 g/L glucose, 50 mg/L NaCl       | [323] |
| <i>Clostridium</i> | <i>acetobutylicum</i> | NCIMB 13357 | 2.89 |  |      | 30 | 8.0   | glucose                            | [323] |
| <i>Clostridium</i> | <i>amygdalinum</i>    | C9          | 2.5  |  |      | 37 | 7.5   | xylose                             | [110] |
| <i>Clostridium</i> | <i>amygdalinum</i>    | C9          | 1.78 |  |      | 37 | 8-8.5 | arabinose                          | [110] |
| <i>Clostridium</i> | <i>beijerinckii</i>   | AM21B       |      |  | 11.9 | 31 |       | 10 g/L glucose (pH not controlled) | [325] |
| <i>Clostridium</i> | <i>beijerinckii</i>   | AM21B       |      |  | 11.2 | 31 |       | 10 g/L starch (pH not controlled)  | [325] |
| <i>Clostridium</i> | <i>beijerinckii</i>   | AM21B       |      |  | 17.9 | 36 | 5.0   | 10 g/L glucose                     | [325] |
| <i>Clostridium</i> | <i>beijerinckii</i>   | AM21B       |      |  | 15   | 36 | 5.0   | 10g/L starch                       | [325] |
| <i>Clostridium</i> | <i>beijerinckii</i>   | AM21B       |      |  | 21   | 36 | 5.5   | 10 g/L glucose                     | [325] |
| <i>Clostridium</i> | <i>beijerinckii</i>   | AM21B       |      |  | 17.9 | 36 | 5.5   | 10g/L starch                       | [325] |
| <i>Clostridium</i> | <i>beijerinckii</i>   | AM21B       |      |  | 21   | 36 | 6.0   | 10 g/L glucose                     | [325] |
| <i>Clostridium</i> | <i>beijerinckii</i>   | AM21B       |      |  | 16.7 | 36 | 6.0   | 10g/L starch                       | [325] |
| <i>Clostridium</i> | <i>beijerinckii</i>   | AM21B       |      |  | 22.3 | 36 | 6.5   | 10 g/L glucose                     | [325] |
| <i>Clostridium</i> | <i>beijerinckii</i>   | AM21B       |      |  | 18.3 | 36 | 6.5   | 10g/L starch                       | [325] |
| <i>Clostridium</i> | <i>beijerinckii</i>   | AM21B       |      |  | 20.3 | 36 | 7.0   | 10 g/L glucose                     | [325] |
| <i>Clostridium</i> | <i>beijerinckii</i>   | AM21B       |      |  | 17.4 | 36 | 7.0   | 10g/L starch                       | [325] |
| <i>Clostridium</i> | <i>beijerinckii</i>   | AM21B       |      |  | 12.1 | 36 |       | 3 g/L arabinose                    | [325] |
| <i>Clostridium</i> | <i>beijerinckii</i>   | AM21B       |      |  | 18   | 36 |       | 3 g/L cellobiose                   | [325] |
| <i>Clostridium</i> | <i>beijerinckii</i>   | AM21B       |      |  | 13.6 | 36 |       | 3 g/L fructose                     | [325] |
| <i>Clostridium</i> | <i>beijerinckii</i>   | AM21B       |      |  | 14.1 | 36 |       | 3 g/L galactose                    | [325] |
| <i>Clostridium</i> | <i>beijerinckii</i>   | AM21B       |      |  | 17   | 36 |       | 3 g/L glucose                      | [325] |
| <i>Clostridium</i> | <i>beijerinckii</i>   | AM21B       |      |  | 15.8 | 36 |       | 10 g/L glucose                     | [325] |
| <i>Clostridium</i> | <i>beijerinckii</i>   | AM21B       |      |  | 16.3 | 36 |       | 3 g/L lactose                      | [325] |
| <i>Clostridium</i> | <i>beijerinckii</i>   | AM21B       |      |  | 14.1 | 36 |       | 3 g/L starch                       | [325] |
| <i>Clostridium</i> | <i>beijerinckii</i>   | AM21B       |      |  | 15.6 | 36 |       | 10 g/L starch                      | [325] |
| <i>Clostridium</i> | <i>beijerinckii</i>   | AM21B       |      |  | 16.1 | 36 |       | sucrose                            | [325] |
| <i>Clostridium</i> | <i>beijerinckii</i>   | AM21B       |      |  | 13.8 | 36 |       | xylose                             | [325] |

|                    |                     |            |            |            |            |    |      |                                           |       |
|--------------------|---------------------|------------|------------|------------|------------|----|------|-------------------------------------------|-------|
| <i>Clostridium</i> | <i>beijerinckii</i> | AM21B      |            |            | 17.9       | 41 |      | glucose                                   | [325] |
| <i>Clostridium</i> | <i>beijerinckii</i> | AM21B      |            |            | 17.9       | 41 |      | starch                                    | [325] |
| <i>Clostridium</i> | <i>butyricum</i>    | ATCC 859   |            |            | 1.82       | 30 | 6.4  | glucose                                   | [81]  |
| <i>Clostridium</i> | <i>butyricum</i>    | ATCC 860   |            |            | 1.08       | 30 | 6.5  | glucose                                   | [81]  |
| <i>Clostridium</i> | <i>butyricum</i>    | CGS5       | 1.73       | 6.07       | 6.2        | 37 | 5.5  | 30 gCOD/L sucrose                         | [115] |
| <i>Clostridium</i> | <i>butyricum</i>    | CGS5       | 1.85       | 11.33      | 7.01       | 37 | 5.5  | 10 gCOD/L sucrose                         | [115] |
| <i>Clostridium</i> | <i>butyricum</i>    | CGS5       | 1.94       | 10.44      | 6.87       | 37 | 5.5  | 5 gCOD/L sucrose                          | [115] |
| <i>Clostridium</i> | <i>butyricum</i>    | CGS5       | 2.78, 2.91 | 9.46, 9.55 | 7.14, 7.27 | 37 | 5.5  | 20 gCOD/L sucrose                         | [115] |
| <i>Clostridium</i> | <i>butyricum</i>    | CGS5       | 1.46       | 10.84      | 9.33       | 37 | 6    | 20 gCOD/L sucrose                         | [115] |
| <i>Clostridium</i> | <i>butyricum</i>    | CGS5       | 1.16       | 8.61       | 7.76       | 37 | 6.5  | 20 gCOD/L sucrose                         | [115] |
| <i>Clostridium</i> | <i>butyricum</i>    | CGS5       | 0.61       | 9.33       | 6.51       | 37 | 7.5  | 20 gCOD/L sucrose                         | [115] |
| <i>Clostridium</i> | <i>butyricum</i>    | IFO 13949  | 2.2-2.4    |            |            | 37 | 5.25 | starch                                    | [328] |
| <i>Clostridium</i> | <i>butyricum</i>    | M3-1       | 0.69       |            | 6.423      | 39 | 6.5  | glucose (no sparging)                     | [326] |
| <i>Clostridium</i> | <i>butyricum</i>    | M3-1       | 1.05       |            | 10.134     | 39 | 6.5  | glucose (N <sub>2</sub> sparging)         | [326] |
| <i>Clostridium</i> | <i>butyricum</i>    | NBRC 13949 |            |            | 2.03       | 30 | 6.4  | glucose                                   | [81]  |
| <i>Clostridium</i> | <i>butyricum</i>    | NBRC 3315  |            |            | 2.14       | 30 | 6.4  | glucose                                   | [81]  |
| <i>Clostridium</i> | <i>butyricum</i>    | NBRC 3315  |            |            | 0.33       | 30 |      | pyruvic acid                              | [81]  |
| <i>Clostridium</i> | <i>butyricum</i>    | W5         | 0.51       |            |            | 35 | 6.5  | glucose, NH <sub>4</sub> NO <sub>3</sub>  | [327] |
| <i>Clostridium</i> | <i>butyricum</i>    | W5         | 0.61       |            |            | 35 | 6.5  | glucose, yeast extract                    | [327] |
| <i>Clostridium</i> | <i>butyricum</i>    | W5         | 1.22       |            |            | 35 | 6.5  | molasses, yeast extract                   | [327] |
| <i>Clostridium</i> | <i>butyricum</i>    | W5         | 0.74       |            |            | 35 | 6.5  | 20 g/L molasses                           | [328] |
| <i>Clostridium</i> | <i>butyricum</i>    | W5         | 1.22       |            |            | 35 | 6.5  | 40 g/L molasses                           | [328] |
| <i>Clostridium</i> | <i>butyricum</i>    | W5         | 1.44       |            |            | 35 | 6.5  | 60 g/L molasses                           | [328] |
| <i>Clostridium</i> | <i>butyricum</i>    | W5         | 1.47       |            |            | 35 | 6.5  | 80 g/L molasses                           | [328] |
| <i>Clostridium</i> | <i>butyricum</i>    | W5         | 1.62       |            |            | 35 | 6.5  | 120 g/L molasses                          | [328] |
| <i>Clostridium</i> | <i>butyricum</i>    | W5         | 1.63       |            |            | 35 | 6.5  | 100 g/L molasses                          | [328] |
| <i>Clostridium</i> | <i>butyricum</i>    | W5         | 1.11       |            |            | 35 | 6.5  | waste potato starch                       | [327] |
| <i>Clostridium</i> | <i>butyricum</i>    | W5         | 1.85       |            | 17.38      | 39 | 6.5  | molasses, NH <sub>4</sub> NO <sub>3</sub> | [328] |

|                    |                       |                    |         |  |       |    |     |                                                                             |                |
|--------------------|-----------------------|--------------------|---------|--|-------|----|-----|-----------------------------------------------------------------------------|----------------|
| <i>Clostridium</i> | <i>paraputrificum</i> | M-21               | 1       |  |       | 45 | 6.5 | chitin (ball milled)                                                        | [329]          |
| <i>Clostridium</i> | <i>paraputrificum</i> | M-21               | 1.3-2.5 |  | 34.8  | 45 | 6.5 | GlcNAc                                                                      | [72, 329, 330] |
| <i>Clostridium</i> | <i>paraputrificum</i> | M-21               | 2.3     |  |       | 45 | 5.5 | GlcNAc                                                                      | [330]          |
| <i>Clostridium</i> | <i>paraputrificum</i> | M-21               | 1.2     |  |       | 45 | 5.8 | chitin                                                                      | [330]          |
| <i>Clostridium</i> | <i>paraputrificum</i> | M-21               | 2.4     |  |       | 45 | 5.8 | GlcNAc                                                                      | [330]          |
| <i>Clostridium</i> | <i>paraputrificum</i> | M-21               | 1.4     |  | 13.33 | 45 | 6.0 | cellobiose                                                                  | [330]          |
| <i>Clostridium</i> | <i>paraputrificum</i> | M-21               | 1.5     |  | 9.3   | 45 | 6.0 | chitin                                                                      | [330]          |
| <i>Clostridium</i> | <i>paraputrificum</i> | M-21               | 1.1     |  | 2.16  | 45 | 6.0 | corn fiber                                                                  | [330]          |
| <i>Clostridium</i> | <i>paraputrificum</i> | M-21               | 2.2     |  |       | 45 | 6.0 | GlcNAc                                                                      | [330]          |
| <i>Clostridium</i> | <i>paraputrificum</i> | M-21               | 1.1     |  | 10.5  | 45 | 6.0 | glucose                                                                     | [330]          |
| <i>Clostridium</i> | <i>paraputrificum</i> | M-21               | 1.2     |  | 1.1   | 45 | 6.0 | lobster shell                                                               | [330]          |
| <i>Clostridium</i> | <i>paraputrificum</i> | M-21               | 1.3     |  | 1.9   | 45 | 6.0 | lobster shell (pretreated)                                                  | [330]          |
| <i>Clostridium</i> | <i>paraputrificum</i> | M-21               | 1.0     |  | 2.7   | 45 | 6.0 | shrimp shell                                                                | [330]          |
| <i>Clostridium</i> | <i>paraputrificum</i> | M-21               | 1.2     |  | 4.4   | 45 | 6.0 | shrimp shell (pretreated)                                                   | [330]          |
| <i>Clostridium</i> | <i>paraputrificum</i> | M-21               | 1.7     |  |       | 45 | 6.3 | GlcNAc                                                                      | [330]          |
| <i>Clostridium</i> | <i>paraputrificum</i> | M-21               | 1.4     |  |       | 45 | 6.5 | chitin                                                                      | [330]          |
| <i>Clostridium</i> | <i>paraputrificum</i> | M-21 (recombinant) | 2.4     |  |       | 45 | 6.5 | GlcNAc                                                                      | [72]           |
| <i>Clostridium</i> | sp.                   | AK 15              | 1.9     |  |       | 60 | 7.0 | glucose                                                                     | [331]          |
| <i>Clostridium</i> | sp.                   | AK 15              | 1.1     |  |       | 60 | 7.0 | xylose                                                                      | [331]          |
| <i>Clostridium</i> | sp.                   | HPB 49             |         |  | 4.69  | 35 | 6.0 | glucose (H <sub>2</sub> sparging)                                           | [76]           |
| <i>Clostridium</i> | sp.                   | HPB 49             |         |  | 2.11  | 35 | 6.0 | glucose (CO <sub>2</sub> sparging)                                          | [76]           |
| <i>Clostridium</i> | sp.                   | HPB 49             |         |  | 4.7   | 35 | 6.0 | glucose (N <sub>2</sub> sparging),<br>10 mg FeSO <sub>4</sub> 200 mg MgCl   | [76]           |
| <i>Clostridium</i> | sp.                   | HPB 49             |         |  | 5.27  | 35 | 6.0 | glucose (N <sub>2</sub> sparging),<br>80 mg FeSO <sub>4</sub> , 200 mg MgCl | [76]           |
| <i>Clostridium</i> | sp.                   | HPB 49             |         |  | 2.09  | 35 | 6.0 | glucose (N <sub>2</sub> sparging),<br>10 mg FeSO <sub>4</sub> , 10 mg MgCl  | [76]           |
| <i>Clostridium</i> | sp.                   | HPB 49             |         |  | 4.72  | 35 | 6.0 | glucose (N <sub>2</sub> sparging),                                          | [76]           |



|                    |     |              |     |  |      |    |         | 10 mg FeSO <sub>4</sub> , 100 mg MgCl |       |
|--------------------|-----|--------------|-----|--|------|----|---------|---------------------------------------|-------|
| <i>Clostridium</i> | sp. | R3           |     |  | 4.92 | 37 | 4.0-4.5 | glucose                               | [332] |
| <i>Clostridium</i> | sp. | strain No. 2 | 2.2 |  | 9.2  | 31 |         | arabinose                             | [45]  |
| <i>Clostridium</i> | sp. | strain No. 2 | 2.5 |  | 11.1 | 31 |         | glucose                               | [45]  |
| <i>Clostridium</i> | sp. | strain No. 2 | 2.0 |  | 9.6  | 31 |         | xylose                                | [45]  |
| <i>Clostridium</i> | sp. | strain No. 2 | 2.2 |  | 15   | 36 | 5.0     | arabinose                             | [45]  |
| <i>Clostridium</i> | sp. | strain No. 2 | 2.2 |  | 18.8 | 36 | 5.0     | glucose                               | [45]  |
| <i>Clostridium</i> | sp. | strain No. 2 | 2.2 |  | 15.2 | 36 | 5.0     | xylose                                | [45]  |
| <i>Clostridium</i> | sp. | strain No. 2 | 2.2 |  | 22.3 | 36 | 6.0     | arabinose (pH controlled)             | [45]  |
| <i>Clostridium</i> | sp. | strain No. 2 | 1.2 |  | 26.8 | 36 | 6.0     | 75 g/L glucose                        | [45]  |
| <i>Clostridium</i> | sp. | strain No. 2 | 1.6 |  | 25.9 | 36 | 6.0     | 20 g/L glucose                        | [45]  |
| <i>Clostridium</i> | sp. | strain No. 2 | 1.8 |  | 22.3 | 36 | 6.0     | 10 g/L glucose (pH not controlled)    | [45]  |
| <i>Clostridium</i> | sp. | strain No. 2 | 2.2 |  | 23.9 | 36 | 6.0     | 10 g/L glucose (pH controlled)        | [45]  |
| <i>Clostridium</i> | sp. | strain No. 2 | 2.7 |  | 27.2 | 36 | 6.0     | 45 g/L glucose                        | [45]  |
| <i>Clostridium</i> | sp. | strain No. 2 | 1.4 |  | 26.8 | 36 | 6.0     | 75 g/L xylose                         | [45]  |
| <i>Clostridium</i> | sp. | strain No. 2 | 1.6 |  | 28.1 | 36 | 6.0     | 45 g/L xylose                         | [45]  |
| <i>Clostridium</i> | sp. | strain No. 2 | 2.0 |  | 28.6 | 36 | 6.0     | 20 g/L xylose                         | [45]  |
| <i>Clostridium</i> | sp. | strain No. 2 | 2.1 |  | 21.7 | 36 | 6.0     | 10 g/L xylose (pH not controlled)     | [45]  |
| <i>Clostridium</i> | sp. | strain No. 2 | 2.2 |  | 21.7 | 36 | 6.0     | 10 g/L xylose (pH controlled)         | [45]  |
| <i>Clostridium</i> | sp. | strain No. 2 | 2.2 |  | 20.5 | 36 | 7.0     | arabinose                             | [45]  |
| <i>Clostridium</i> | sp. | strain No. 2 | 2.2 |  | 21.9 | 36 | 7.0     | glucose                               | [45]  |
| <i>Clostridium</i> | sp. | strain No. 2 | 2.2 |  | 21.4 | 36 | 7.0     | xylose                                | [45]  |
| <i>Clostridium</i> | sp. | strain No. 2 | 2.3 |  | 16.5 | 36 |         | xylose                                | [45]  |
| <i>Clostridium</i> | sp. | strain No. 2 | 2.4 |  | 11.4 | 41 |         | arabinose                             | [45]  |
| <i>Clostridium</i> | sp. | strain No. 2 | 2.8 |  | 15.9 | 41 |         | glucose                               | [45]  |
| <i>Clostridium</i> | sp. | strain No. 2 | 2.4 |  | 13.8 | 41 |         | xylose                                | [45]  |

|                     |                      |            |           |       |       |      |      |                                         |            |
|---------------------|----------------------|------------|-----------|-------|-------|------|------|-----------------------------------------|------------|
| <i>Clostridium</i>  | sp.                  | W1         | 0.51      |       |       | 35   |      | glucose                                 | [333]      |
| <i>Clostridium</i>  | sp.                  | W1         | 1.21      |       |       | 40   | 7.5  | glucose                                 | [333]      |
| <i>Clostridium</i>  | sp.                  | W4         | 0.56      |       |       | 35   |      | glucose                                 | [333]      |
| <i>Clostridium</i>  | sp.                  | W4         | 1.34      |       |       | 40   | 7.5  | glucose                                 | [333]      |
| <i>Clostridium</i>  | sp.                  | W5         | 0.7       |       |       | 35   |      | glucose                                 | [333]      |
| <i>Clostridium</i>  | sp.                  | W5         | 1.77      |       |       | 40   | 7.5  | glucose                                 | [333]      |
| <i>Clostridium</i>  | <i>tryobutyricum</i> | JM1        | 1.59      |       |       | 37   | 6.0  | 111.2 mM glucose                        | [334]      |
| <i>Clostridium</i>  | <i>tryobutyricum</i> | JM1        | 0.99      |       |       | 37   | 6.3  | 27.8 mM glucose                         | [335]      |
| <i>Clostridium</i>  | <i>tryobutyricum</i> | JM1        | 1.35-1.75 |       |       | 37   | 6.3  | 111.2 mM glucose                        | [334, 335] |
| <i>Clostridium</i>  | <i>tryobutyricum</i> | JM1        | 1.52      |       |       | 37   | 6.3  | 222.4 mM glucose                        | [335]      |
| <i>Clostridium</i>  | <i>tryobutyricum</i> | JM1        | 0.72      |       |       | 37   | 6.3  | 333.6 mM glucose                        | [335]      |
| <i>Clostridium</i>  | <i>tryobutyricum</i> | JM1        | 1.67      |       |       | 37   | 6.7  | 111.2 mM glucose                        | [334]      |
| <i>Enterobacter</i> | <i>aerogenes</i>     | ATCC 15038 | 0.63      |       |       | 30   | 6.0  | glycerol wastes (160 mM), 2 mM thionine | [336]      |
| <i>Enterobacter</i> | <i>aerogenes</i>     | ATCC 15038 | 0.66      |       |       | 30   | 6.0  | glycerol wastes (161 mM), 1 mM thionine | [336]      |
| <i>Enterobacter</i> | <i>aerogenes</i>     | ATCC 15038 | 0.74      |       |       | 30   | 6.0  | glycerol wastes (107 mM), 2 mM thionine | [336]      |
| <i>Enterobacter</i> | <i>aerogenes</i>     | ATCC 15038 | 0.77      |       |       | 30   | 6.0  | glycerol wastes (108 mM), 1 mM thionine | [336]      |
| <i>Enterobacter</i> | <i>aerogenes</i>     | E. 82005   | 0.82      |       | 2.96  | 37   | 5.8  | glucose, 25 mM formate                  | [337]      |
| <i>Enterobacter</i> | <i>aerogenes</i>     | E. 82005   | 0.89      |       | 2.23  | 37   | 5.8  | glucose, 24 mM formate                  | [337]      |
| <i>Enterobacter</i> | <i>aerogenes</i>     | E. 82005   | 0.72      |       | 1.81  | 37   | 6.3  | glucose, 34 mM formate                  | [337]      |
| <i>Enterobacter</i> | <i>aerogenes</i>     | E. 82005   | 0.84      |       | 3     | 37   | 6.3  | glucose, 48 mM formate                  | [337]      |
| <i>Enterobacter</i> | <i>aerogenes</i>     | E.82005    | 0.75      | 3.57  | 2.41  | 37.5 | 5.0  | glucose                                 | [338]      |
| <i>Enterobacter</i> | <i>aerogenes</i>     | E.82005    | 1.02      | 12.23 | 11.78 | 37.5 | 5.5  | glucose                                 | [338]      |
| <i>Enterobacter</i> | <i>aerogenes</i>     | E.82005    | 1.07      | 12.14 | 17.31 | 37.5 | 6.0  | glucose                                 | [338]      |
| <i>Enterobacter</i> | <i>aerogenes</i>     | E.82005    | 0.99      | 12.23 | 11.78 | 37.5 | 6.25 | glucose                                 | [338]      |
| <i>Enterobacter</i> | <i>aerogenes</i>     | E.82005    | 1.10      | 9.15  | 16.69 | 37.5 | 6.5  | glucose                                 | [338]      |
| <i>Enterobacter</i> | <i>aerogenes</i>     | E.82005    | 0.38      | 4.33  | 8.12  | 37.5 | 7.0  | glucose                                 | [338]      |

|                     |                  |             |      |      |           |      |     |                                    |       |
|---------------------|------------------|-------------|------|------|-----------|------|-----|------------------------------------|-------|
| <i>Enterobacter</i> | <i>aerogenes</i> | E.82005     | 0.19 | 1.56 | 2.63      | 37.5 | 7.5 | glucose                            | [338] |
| <i>Enterobacter</i> | <i>aerogenes</i> | E.82005     | 0.52 |      |           | 38   | 6.0 | molasses                           | [339] |
| <i>Enterobacter</i> | <i>aerogenes</i> | E.82005     | 1.07 |      |           | 38   | 6.0 | molasses (H <sub>2</sub> sparging) | [339] |
| <i>Enterobacter</i> | <i>aerogenes</i> | E.82005     | 1.09 |      |           | 38   | 6.0 | molasses (argon sparging)          | [339] |
| <i>Enterobacter</i> | <i>aerogenes</i> | E.82005     | 1.16 |      |           | 38   | 6.0 | molasses/peptone                   | [339] |
| <i>Enterobacter</i> | <i>aerogenes</i> | E.82005     | 1.58 |      |           | 38   | 6.0 | molasses/peptone (argon sparging)  | [339] |
| <i>Enterobacter</i> | <i>aerogenes</i> | EGU16       | 0.68 |      |           | 40   | 7.0 | glucose                            | [316] |
| <i>Enterobacter</i> | <i>aerogenes</i> | IAM 1183    | 0.81 |      | 8.76      | 37   |     | arabinose                          | [340] |
| <i>Enterobacter</i> | <i>aerogenes</i> | IAM 1183    | 0.26 |      | 11.04     | 37   |     | galactose                          | [340] |
| <i>Enterobacter</i> | <i>aerogenes</i> | IAM 1183    | 1.30 |      | 20.14     | 37   |     | mannose                            | [340] |
| <i>Enterobacter</i> | <i>aerogenes</i> | IAM 1183    | 0.56 |      | 9.48      | 37   |     | rhamnose                           | [340] |
| <i>Enterobacter</i> | <i>aerogenes</i> | IAM 1183    | 0.79 |      | 9.48      | 37   |     | xylose                             | [340] |
| <i>Enterobacter</i> | <i>aerogenes</i> | NBRC 12010  |      |      | 0.08      | 30   | 6.5 | glucose                            | [81]  |
| <i>Enterobacter</i> | <i>aerogenes</i> | NBRC 13543  |      |      | 0.25-0.38 | 30   | 6.5 | glucose                            | [81]  |
| <i>Enterobacter</i> | <i>aerogenes</i> | NBRC 13543  |      |      | 0.34      | 30   |     | dextrin                            | [81]  |
| <i>Enterobacter</i> | <i>aerogenes</i> | NBRC 13543  |      |      | 0.77      | 30   |     | fructose                           | [81]  |
| <i>Enterobacter</i> | <i>aerogenes</i> | NBRC 13543  |      |      | 0.85      | 30   |     | galactose                          | [81]  |
| <i>Enterobacter</i> | <i>aerogenes</i> | NBRC 13543  |      |      | 0.74      | 30   |     | maltose                            | [81]  |
| <i>Enterobacter</i> | <i>aerogenes</i> | NBRC 13543  |      |      | 0.94      | 30   |     | mannitol                           | [81]  |
| <i>Enterobacter</i> | <i>aerogenes</i> | NBRC 13543  |      |      | 0.77      | 30   |     | mannose                            | [81]  |
| <i>Enterobacter</i> | <i>aerogenes</i> | NBRC 13543  |      |      | 0.24      | 30   |     | pyvuric acid                       | [81]  |
| <i>Enterobacter</i> | <i>aerogenes</i> | NBRC 13543  |      |      | 0.55      | 30   |     | sucrose                            | [81]  |
| <i>Enterobacter</i> | <i>aerogenes</i> | NCIMB 10102 | 0.13 | 1.95 | 2.1       | 39   | 4.5 | corn starch hydrolysate            | [341] |
| <i>Enterobacter</i> | <i>aerogenes</i> | NCIMB 10102 | 0.44 | 2.88 | 2.99      | 39   | 5   | corn starch hydrolysate            | [341] |
| <i>Enterobacter</i> | <i>aerogenes</i> | NCIMB 10102 | 0.74 | 4.43 | 9.34      | 39   | 5.5 | corn starch hydrolysate            | [341] |
| <i>Enterobacter</i> | <i>aerogenes</i> | NCIMB 10102 | 0.93 | 9.89 | 11.67     | 39   | 6   | corn starch hydrolysate            | [341] |

|                     |                  |             |           |         |           |    |     |                                                    |       |
|---------------------|------------------|-------------|-----------|---------|-----------|----|-----|----------------------------------------------------|-------|
| <i>Enterobacter</i> | <i>aerogenes</i> | NCIMB 10102 | 0.56      |         |           | 39 | 6.0 | 9 g/L glucose                                      | [342] |
| <i>Enterobacter</i> | <i>aerogenes</i> | NCIMB 10102 | 0.60      |         |           | 39 | 6.0 | 18 g/L glucose                                     | [342] |
| <i>Enterobacter</i> | <i>aerogenes</i> | NCIMB 10102 | 0.62      |         |           | 39 | 6.0 | 27 g/L glucose                                     | [342] |
| <i>Enterobacter</i> | <i>aerogenes</i> | NCIMB 10102 | 0.65      |         |           | 39 | 6.0 | 36 g/L glucose                                     | [342] |
| <i>Enterobacter</i> | <i>aerogenes</i> | NCIMB 10102 | 0.65      |         |           | 39 | 6.0 | 45 g/L glucose                                     | [342] |
| <i>Enterobacter</i> | <i>aerogenes</i> | NCIMB 10102 | 0.65      |         |           | 39 | 6.0 | 54 g/L glucose                                     | [342] |
| <i>Enterobacter</i> | <i>aerogenes</i> | NCIMB 10102 | 0.66      |         |           | 39 | 6.0 | 72 g/L glucose                                     | [342] |
| <i>Enterobacter</i> | <i>aerogenes</i> | NCIMB 10102 | 1.09      | 9.68    | 17.39     | 39 | 6.5 | corn starch hydrolysate                            | [341] |
| <i>Enterobacter</i> | <i>aerogenes</i> | NCIMB 10102 | 0.95      | 7.3     | 15.3      | 39 | 7   | corn starch hydrolysate                            | [341] |
| <i>Enterobacter</i> | <i>aerogenes</i> | NCIMB 10102 | 0.23      | 3.55    | 8.07      | 39 | 7.5 | corn starch hydrolysate                            | [341] |
| <i>Enterobacter</i> | <i>aerogenes</i> | NCIMB 10102 | 0.20      | 2.46    | 5.02      | 39 | 8   | corn starch hydrolysate                            | [341] |
| <i>Enterobacter</i> | <i>aerogenes</i> | NCIMB 10102 | 0.28      | 2.9     | 8.2       | 40 | 5.5 | 54 g/L corn starch hydrolysate                     | [343] |
| <i>Enterobacter</i> | <i>aerogenes</i> | NCIMB 10102 | 0.34-0.45 | 3.0-3.6 | 10.3-11.3 | 40 | 5.5 | 36 g/L corn starch hydrolysate                     | [343] |
| <i>Enterobacter</i> | <i>aerogenes</i> | NCIMB 10102 | 0.54-1.1  | 5.3-8   | 10.7-14.6 | 40 | 5.5 | 18 g/L corn starch hydrolysate                     | [343] |
| <i>Enterobacter</i> | <i>aerogenes</i> | NCIMB 10102 | 0.63      | 3.31    | 5.3       | 40 |     | 18 g/L corn starch hydrolysate (pH not controlled) | [343] |
| <i>Enterobacter</i> | <i>aerogenes</i> | NCIMB 10102 | 1.1       | 4.14    | 5.3       | 40 |     | 10 g/L corn starch hydrolysate (pH not controlled) | [343] |
| <i>Enterobacter</i> | <i>aerogenes</i> | NCIMB 10102 | 1.8       | 4.73    | 5.2       | 40 |     | 5 g/L corn starch hydrolysate (pH not controlled)  | [343] |
| <i>Enterobacter</i> | <i>aerogenes</i> | NCIMB 10102 | 0.19      | 2.38    | 2         | 40 |     | 18 g/L glucose (pH not controlled)                 | [343] |
| <i>Enterobacter</i> | <i>aerogenes</i> | NCIMB 10102 | 0.30      | 1.96    | 2         | 40 |     | 10 g/L glucose (pH not controlled)                 | [343] |
| <i>Enterobacter</i> | <i>asburiae</i>  | SNU-1       | 0.43      |         | 0.8       | 25 | 6.1 | formate                                            | [344] |
| <i>Enterobacter</i> | <i>asburiae</i>  | SNU-1       | 0.99      |         | 6.29      | 30 | 6.1 | formate                                            | [344] |
| <i>Enterobacter</i> | <i>asburiae</i>  | SNU-1       | 0.08      |         | 2.81      | 37 | 4.0 | glucose                                            | [345] |

|                     |                 |       |           |  |           |    |     |                    |       |
|---------------------|-----------------|-------|-----------|--|-----------|----|-----|--------------------|-------|
| <i>Enterobacter</i> | <i>asburiae</i> | SNU-1 | 0.32      |  | 5.76      | 37 | 5.0 | glucose            | [345] |
| <i>Enterobacter</i> | <i>asburiae</i> | SNU-1 | 0.41      |  | 5.76      | 37 | 5.5 | glucose            | [345] |
| <i>Enterobacter</i> | <i>asburiae</i> | SNU-1 | 0.92      |  | 4.95      | 37 | 5.8 | formate            | [344] |
| <i>Enterobacter</i> | <i>asburiae</i> | SNU-1 | 0.31      |  | 2.84      | 37 | 6.0 | glucose            | [345] |
| <i>Enterobacter</i> | <i>asburiae</i> | SNU-1 | 0.64      |  | 2.01      | 37 | 6.1 | 30 mM formate      | [344] |
| <i>Enterobacter</i> | <i>asburiae</i> | SNU-1 | 0.94      |  | 4.06      | 37 | 6.1 | 50 mM formate      | [344] |
| <i>Enterobacter</i> | <i>asburiae</i> | SNU-1 | 0.88-1.06 |  | 8.79-11.7 | 37 | 6.1 | 100 mM formate     | [344] |
| <i>Enterobacter</i> | <i>asburiae</i> | SNU-1 | 1.07      |  | 18.5      | 37 | 6.1 | 270 mM formate     | [344] |
| <i>Enterobacter</i> | <i>asburiae</i> | SNU-1 | 1.06      |  | 21.9      | 37 | 6.1 | 350 mM formate     | [344] |
| <i>Enterobacter</i> | <i>asburiae</i> | SNU-1 | 1.10      |  | 11.3      | 37 | 6.1 | 500 mM formate     | [344] |
| <i>Enterobacter</i> | <i>asburiae</i> | SNU-1 | 0.97      |  | 7.99      | 37 | 6.4 | formate            | [344] |
| <i>Enterobacter</i> | <i>asburiae</i> | SNU-1 | 0.30      |  | 5.62      | 37 | 6.5 | glucose            | [345] |
| <i>Enterobacter</i> | <i>asburiae</i> | SNU-1 | 0.83      |  | 6.83      | 37 | 6.7 | formate            | [344] |
| <i>Enterobacter</i> | <i>asburiae</i> | SNU-1 | 0.73      |  | 3.66      | 37 | 7.0 | formate            | [344] |
| <i>Enterobacter</i> | <i>asburiae</i> | SNU-1 | 0.54      |  | 7.81      | 37 | 7.0 | 10 g/L glucose     | [345] |
| <i>Enterobacter</i> | <i>asburiae</i> | SNU-1 |           |  | 17.76     | 37 | 7.0 | 25 g/L glucose     | [345] |
| <i>Enterobacter</i> | <i>asburiae</i> | SNU-1 | 0.26      |  | 2.59      | 37 | 7.1 | glucose            | [345] |
| <i>Enterobacter</i> | <i>asburiae</i> | SNU-1 | 0.06      |  | 1.07      | 37 | 7.5 | glucose            | [345] |
| <i>Enterobacter</i> | <i>asburiae</i> | SNU-1 | 0.95      |  | 10.9      | 42 | 6.1 | formate            | [344] |
| <i>Enterobacter</i> | <i>asburiae</i> | SNU-1 | 0.75      |  | 9.28      | 47 | 6.1 | formate            | [344] |
| <i>Enterobacter</i> | <i>cloacae</i>  | A1    | 1.8       |  |           | 36 | 6.0 | glucose            | [346] |
| <i>Enterobacter</i> | <i>cloacae</i>  | A2    | 1.8       |  |           | 36 | 6.0 | glucose            | [346] |
| <i>Enterobacter</i> | <i>cloacae</i>  | A3    | 1.8       |  |           | 36 | 6.0 | glucose            | [346] |
| <i>Enterobacter</i> | <i>cloacae</i>  | A3    | 0.65      |  |           |    |     | glucose            | [346] |
| <i>Enterobacter</i> | <i>cloacae</i>  | DM 1  | 1.6       |  |           |    |     | glucose            | [346] |
| <i>Enterobacter</i> | <i>cloacae</i>  | DM 10 | 2.1       |  |           |    |     | glucose            | [346] |
| <i>Enterobacter</i> | <i>cloacae</i>  | DM 11 | 3.9       |  | 0.017     | 37 | 6   | glucose            | [33]  |
| <i>Enterobacter</i> | <i>cloacae</i>  | DM 11 |           |  | 0.54      | 37 | 6.5 | 0.2% (w/v) glucose | [347] |
| <i>Enterobacter</i> | <i>cloacae</i>  | DM 11 |           |  | 0.57      | 37 | 6.5 | 0.4% (w/v) glucose | [347] |

|                     |                |       |      |  |            |    |     |                    |           |
|---------------------|----------------|-------|------|--|------------|----|-----|--------------------|-----------|
| <i>Enterobacter</i> | <i>cloacae</i> | DM 11 |      |  | 0.83       | 37 | 6.5 | 0.6% (w/v) glucose | [347]     |
| <i>Enterobacter</i> | <i>cloacae</i> | DM 11 |      |  | 0.85       | 37 | 6.5 | 0.8% (w/v) glucose | [347]     |
| <i>Enterobacter</i> | <i>cloacae</i> | DM 11 | 3.31 |  | 1.22, 2.18 | 37 | 6.5 | 1.0% (w/v) glucose | [347-349] |
| <i>Enterobacter</i> | <i>cloacae</i> | DM 11 |      |  | 1.13       | 37 | 6.5 | 1.2% (w/v) glucose | [347]     |
| <i>Enterobacter</i> | <i>cloacae</i> | DM 11 |      |  | 1.05       | 37 | 6.5 | 1.4% (w/v) glucose | [347]     |
| <i>Enterobacter</i> | <i>cloacae</i> | DM 11 |      |  | 0.07       | 37 | 4.5 | glucose            | [348]     |
| <i>Enterobacter</i> | <i>cloacae</i> | DM 11 |      |  | 0.78       | 37 | 5.0 | glucose            | [348]     |
| <i>Enterobacter</i> | <i>cloacae</i> | DM 11 |      |  | 1.34       | 37 | 5.5 | glucose            | [348]     |
| <i>Enterobacter</i> | <i>cloacae</i> | DM 11 |      |  | 1.29       | 37 | 6.0 | 0.2% (w/v) glucose | [348]     |
| <i>Enterobacter</i> | <i>cloacae</i> | DM 11 |      |  | 1.16       | 37 | 6.0 | 0.4% (w/v) glucose | [348]     |
| <i>Enterobacter</i> | <i>cloacae</i> | DM 11 |      |  | 1.44       | 37 | 6.0 | 0.6% (w/v) glucose | [348]     |
| <i>Enterobacter</i> | <i>cloacae</i> | DM 11 |      |  | 1.63       | 37 | 6.0 | 0.8% (w/v) glucose | [348]     |
| <i>Enterobacter</i> | <i>cloacae</i> | DM 11 |      |  | 2.03-2.09  | 37 | 6.0 | 1.0% (w/v) glucose | [348]     |
| <i>Enterobacter</i> | <i>cloacae</i> | DM 11 |      |  | 1.83       | 37 | 6.0 | 1.2% (w/v) glucose | [348]     |
| <i>Enterobacter</i> | <i>cloacae</i> | DM 11 |      |  | 1.55       | 37 | 6.0 | 1.4% (w/v) glucose | [348]     |
| <i>Enterobacter</i> | <i>cloacae</i> | DM 11 |      |  | 2.03       | 37 | 7.0 | glucose            | [348]     |
| <i>Enterobacter</i> | <i>cloacae</i> | DM 11 |      |  | 1.96       | 37 | 7.5 | glucose            | [348]     |
| <i>Enterobacter</i> | <i>cloacae</i> | DM 11 |      |  | 1.89       | 37 | 8.0 | glucose            | [348]     |
| <i>Enterobacter</i> | <i>cloacae</i> | DM 12 | 2.6  |  |            |    |     | glucose            | [346]     |
| <i>Enterobacter</i> | <i>cloacae</i> | DM 13 | 1.8  |  |            |    |     | glucose            | [346]     |
| <i>Enterobacter</i> | <i>cloacae</i> | DM 14 | 3.0  |  |            |    |     | glucose            | [346]     |
| <i>Enterobacter</i> | <i>cloacae</i> | DM 15 | 2.1  |  |            |    |     | glucose            | [346]     |
| <i>Enterobacter</i> | <i>cloacae</i> | DM 16 | 2.9  |  |            |    |     | glucose            | [346]     |
| <i>Enterobacter</i> | <i>cloacae</i> | DM 17 | 2.9  |  |            |    |     | glucose            | [346]     |
| <i>Enterobacter</i> | <i>cloacae</i> | DM 18 | 2.6  |  |            |    |     | glucose            | [346]     |
| <i>Enterobacter</i> | <i>cloacae</i> | DM 19 | 2.9  |  |            |    |     | glucose            | [346]     |
| <i>Enterobacter</i> | <i>cloacae</i> | DM 2  | 0.9  |  |            |    |     | glucose            | [346]     |
| <i>Enterobacter</i> | <i>cloacae</i> | DM 20 | 3.0  |  |            |    |     | glucose            | [346]     |
| <i>Enterobacter</i> | <i>cloacae</i> | DM 21 | 2.5  |  |            |    |     | glucose            | [346]     |

|                     |                |           |          |  |             |    |     |                                                      |            |
|---------------------|----------------|-----------|----------|--|-------------|----|-----|------------------------------------------------------|------------|
| <i>Enterobacter</i> | <i>cloacae</i> | DM 22     | 2.6      |  |             |    |     | glucose                                              | [346]      |
| <i>Enterobacter</i> | <i>cloacae</i> | DM 3      | 1.9      |  |             |    |     | glucose                                              | [346]      |
| <i>Enterobacter</i> | <i>cloacae</i> | DM 4      | 0.1      |  |             |    |     | glucose                                              | [346]      |
| <i>Enterobacter</i> | <i>cloacae</i> | DM 5      | 0.2      |  |             |    |     | glucose                                              | [346]      |
| <i>Enterobacter</i> | <i>cloacae</i> | DM 6      | 1.7      |  |             |    |     | glucose                                              | [346]      |
| <i>Enterobacter</i> | <i>cloacae</i> | DM 7      | 1.1      |  |             |    |     | glucose                                              | [346]      |
| <i>Enterobacter</i> | <i>cloacae</i> | DM 8      | 0.4      |  |             |    |     | glucose                                              | [346]      |
| <i>Enterobacter</i> | <i>cloacae</i> | DM 9      | 0.2      |  |             |    |     | glucose                                              | [346]      |
| <i>Enterobacter</i> | <i>cloacae</i> | IIT-BT 08 | 2.2, 2.3 |  |             | 36 | 6.0 | glucose                                              | [346, 350] |
| <i>Enterobacter</i> | <i>cloacae</i> | IIT-BT 08 | 1.61     |  | 10.41       | 37 | 5.5 | glucose (pH not controlled)                          | [32]       |
| <i>Enterobacter</i> | <i>cloacae</i> | IIT-BT 08 |          |  | 15.92       | 37 | 5.5 | glucose (pH controlled)                              | [32]       |
| <i>Enterobacter</i> | <i>cloacae</i> | IIT-BT 08 | 1.82     |  | 17.11       | 37 | 6.0 | glucose (pH not controlled)                          | [32]       |
| <i>Enterobacter</i> | <i>cloacae</i> | IIT-BT 08 |          |  | 23.82       | 37 | 6.0 | glucose (pH controlled)                              | [32]       |
| <i>Enterobacter</i> | <i>cloacae</i> | IIT-BT 08 | 2.2      |  | 13.33       | 37 | 6.5 | glucose (pH not controlled)                          | [32]       |
| <i>Enterobacter</i> | <i>cloacae</i> | IIT-BT 08 |          |  | 17.8, 32.17 | 37 | 6.5 | glucose (pH controlled)                              | [32]       |
| <i>Enterobacter</i> | <i>cloacae</i> | IIT-BT 08 |          |  | 15.66       | 37 | 6.5 | glucose (pH controlled), 0.1 mM sodium biocarbonate  | [32]       |
| <i>Enterobacter</i> | <i>cloacae</i> | IIT-BT 08 |          |  | 21.03       | 37 | 6.5 | glucose (pH controlled), 0.25 mM sodium biocarbonate | [32]       |
| <i>Enterobacter</i> | <i>cloacae</i> | IIT-BT 08 |          |  | 11.69       | 37 | 6.5 | glucose (pH controlled), 0.5 mM sodium biocarbonate  | [32]       |
| <i>Enterobacter</i> | <i>cloacae</i> | IIT-BT 08 |          |  | 9.28        | 37 | 6.5 | glucose (pH controlled), 0.75 mM sodium biocarbonate | [32]       |
| <i>Enterobacter</i> | <i>cloacae</i> | IIT-BT 08 | 1.42     |  | 15.05       | 37 | 7.0 | glucose (pH not controlled)                          | [32]       |
| <i>Enterobacter</i> | <i>cloacae</i> | IIT-BT 08 |          |  | 7.76        | 37 | 7.0 | glucose (pH controlled)                              | [32]       |
| <i>Enterobacter</i> | <i>cloacae</i> | IIT-BT 08 | 0.88     |  | 4.88        | 37 | 7.5 | glucose (pH not controlled)                          | [32]       |
| <i>Enterobacter</i> | <i>cloacae</i> | IIT-BT 08 |          |  | 7.85        | 37 | 7.5 | glucose (pH controlled)                              | [32]       |

|                     |                   |           |           |       |       |    |     |                             |       |
|---------------------|-------------------|-----------|-----------|-------|-------|----|-----|-----------------------------|-------|
| <i>Enterobacter</i> | <i>cloacae</i>    | IIT-BT 08 | 1.81      | 10.21 | 7.29  | 36 | 4.5 | sucrose                     | [350] |
| <i>Enterobacter</i> | <i>cloacae</i>    | IIT-BT 08 | 2.50      | 24.22 | 17.45 | 36 | 5.0 | sucrose                     | [350] |
| <i>Enterobacter</i> | <i>cloacae</i>    | IIT-BT 08 | 4.13      | 25.32 | 23.17 | 36 | 5.5 | sucrose                     | [350] |
| <i>Enterobacter</i> | <i>cloacae</i>    | IIT-BT 08 |           |       | 3.93  | 36 | 6.0 | cellulose                   | [350] |
| <i>Enterobacter</i> | <i>cloacae</i>    | IIT-BT 08 | 5.4       |       | 29    | 36 | 6.0 | cellobiose                  | [350] |
| <i>Enterobacter</i> | <i>cloacae</i>    | IIT-BT 08 | 2.2       |       | 19.94 | 36 | 6.0 | dextrose                    | [350] |
| <i>Enterobacter</i> | <i>cloacae</i>    | IIT-BT 08 | 0.95      |       | 15.53 | 36 | 6.0 | xylose                      | [350] |
| <i>Enterobacter</i> | <i>cloacae</i>    | IIT-BT 08 | 1.6       |       | 19.63 | 36 | 6.0 | fructose                    | [350] |
| <i>Enterobacter</i> | <i>cloacae</i>    | IIT-BT 08 | 1.5       |       | 16.06 | 36 | 6.0 | arabinose                   | [350] |
| <i>Enterobacter</i> | <i>cloacae</i>    | IIT-BT 08 | 1.4       |       | 8.03  | 36 | 6.0 | maltose                     | [350] |
| <i>Enterobacter</i> | <i>cloacae</i>    | IIT-BT 08 |           |       | 8.92  | 36 | 6.0 | potato starch               | [350] |
| <i>Enterobacter</i> | <i>cloacae</i>    | IIT-BT 08 | 6.0       |       | 29.45 | 36 | 6.0 | sucrose (pH not controlled) | [350] |
| <i>Enterobacter</i> | <i>cloacae</i>    | IIT-BT 08 | 6.00      | 29.50 | 35.62 | 36 | 6.0 | sucrose (pH controlled)     | [350] |
| <i>Enterobacter</i> | <i>cloacae</i>    | IIT-BT 08 | 3.10      | 24.61 | 21.43 | 36 | 6.5 | sucrose                     | [350] |
| <i>Enterobacter</i> | <i>cloacae</i>    | IIT-BT 08 | 1.75      | 17.58 | 18.29 | 36 | 7.0 | sucrose                     | [350] |
| <i>Enterobacter</i> | <i>cloacae</i>    | IIT-BT 08 | 0.8       | 5.43  | 6.87  | 36 | 7.5 | sucrose                     | [350] |
| <i>Enterobacter</i> | <i>cloacae</i>    | UW-C83    | 0.25-0.39 |       |       | 30 | 6.1 | glucose                     | [351] |
| <i>Enterobacter</i> | sp.               | BY-29     | 0.99      |       |       | 37 | 7.0 | arabinose                   | [56]  |
| <i>Enterobacter</i> | sp.               | BY-29     | 1.05      |       |       | 37 | 7.0 | fructose                    | [56]  |
| <i>Enterobacter</i> | sp.               | BY-29     | 1.28      |       |       | 37 | 7.0 | galactose                   | [56]  |
| <i>Enterobacter</i> | sp.               | BY-29     | 1.1       |       |       | 37 | 7.0 | glucose                     | [56]  |
| <i>Enterobacter</i> | sp.               | BY-29     | 1.46      |       |       | 37 | 7.0 | maltose                     | [56]  |
| <i>Enterobacter</i> | sp.               | BY-29     | 1.17      |       |       | 37 | 7.0 | mannose                     | [56]  |
| <i>Enterobacter</i> | sp.               | BY-29     | 1.09      |       |       | 37 | 7.0 | sucrose                     | [56]  |
| <i>Enterobacter</i> | sp.               | BY-29     | 1.35      |       |       | 37 | 7.0 | xylose                      | [56]  |
| <i>Escherichia</i>  | <i>aureescens</i> | no.219    | 0.71      |       |       | 35 | 6.2 | glucose                     | [352] |
| <i>Escherichia</i>  | <i>aureescens</i> | no.219    | 0.002     |       |       | 35 | 7.8 | glucose                     | [352] |
| <i>Escherichia</i>  | <i>aureescens</i> | no.220    | 0.91      |       |       | 35 | 6.2 | glucose                     | [352] |



|                    |                  |                                                                    |           |             |      |    |     |          |           |
|--------------------|------------------|--------------------------------------------------------------------|-----------|-------------|------|----|-----|----------|-----------|
| <i>Escherichia</i> | <i>aurescens</i> | no.220                                                             | 0.003     |             |      | 35 | 7.8 | glucose  | [352]     |
| <i>Escherichia</i> | <i>coli</i>      | ATCC 27325                                                         | 2.5       | 65, 53-73.9 |      | 37 | 6.5 | formate  | [63, 353] |
| <i>Escherichia</i> | <i>coli</i>      | ATCC 27325                                                         | 1.08      | 9.5         |      | 37 | 6.0 | glucose  | [354]     |
| <i>Escherichia</i> | <i>coli</i>      | ATCC 700926                                                        | 0.05-0.19 |             |      |    |     | glycerol | [355]     |
| <i>Escherichia</i> | <i>coli</i>      | Ba                                                                 | 0.76      |             |      | 35 | 6.2 | glucose  | [352]     |
| <i>Escherichia</i> | <i>coli</i>      | Ba                                                                 | 0.006     |             |      | 35 | 7.8 | glucose  | [352]     |
| <i>Escherichia</i> | <i>coli</i>      | BL-21 (recombinant)                                                | 3.12      |             |      | 37 | 6   | glucose  | [356]     |
| <i>Escherichia</i> | <i>coli</i>      | BW25113 <i>hyaB</i><br><i>hybC hycA</i><br><i>fdoG/pCA24N-FhIA</i> |           |             | 24.9 | 37 |     | formate  | [65]      |
| <i>Escherichia</i> | <i>coli</i>      | BW25113 <i>hyaB</i><br><i>hybC hycA</i><br><i>focB/pCA24N-FhIA</i> |           |             | 13.4 | 37 |     | formate  | [65]      |
| <i>Escherichia</i> | <i>coli</i>      | BW25113 <i>hyaB</i><br><i>hybC hycA/pCA24N-</i><br><i>FhIA</i>     |           |             | 14.1 | 37 |     | formate  | [65]      |
| <i>Escherichia</i> | <i>coli</i>      | BW25113 <i>hyaB</i><br><i>hybC hycE</i>                            | 0.09      |             | 0.13 | 37 |     | formate  | [66]      |
| <i>Escherichia</i> | <i>coli</i>      | BW25113 <i>hyaB</i><br><i>hybC hycE/pCA24N</i>                     |           |             | 0.07 | 37 |     | formate  | [65]      |
| <i>Escherichia</i> | <i>coli</i>      | BW25113 <i>hyaB</i><br><i>hybC/pCA24N-FhIA</i>                     |           |             | 12.5 | 37 |     | formate  | [65]      |
| <i>Escherichia</i> | <i>coli</i>      | BW25113/pCA24N                                                     |           |             | 0.2  | 37 |     | formate  | [65]      |
| <i>Escherichia</i> | <i>coli</i>      | BW25113/pCA24N-<br>FhIA                                            |           |             | 1.5  | 37 |     | formate  | [65]      |
| <i>Escherichia</i> | <i>coli</i>      | DJT135                                                             | 1.68      |             |      | 35 | 6.5 | glucose  | [84]      |
| <i>Escherichia</i> | <i>coli</i>      | epHycE17                                                           | 0.4       |             | 0.53 | 37 |     | formate  | [66]      |
| <i>Escherichia</i> | <i>coli</i>      | epHycE21                                                           | 0.558     |             | 1.03 | 37 |     | formate  | [66]      |
| <i>Escherichia</i> | <i>coli</i>      | epHycE23-2                                                         | 0.33      |             | 0.51 | 37 |     | formate  | [66]      |
| <i>Escherichia</i> | <i>coli</i>      | epHycE39                                                           | 0.23      |             | 0.32 | 37 |     | formate  | [66]      |
| <i>Escherichia</i> | <i>coli</i>      | epHycE67                                                           | 0.44      |             | 0.88 | 37 |     | formate  | [66]      |
| <i>Escherichia</i> | <i>coli</i>      | epHycE70                                                           | 0.6       |             | 1.1  | 37 |     | formate  | [66]      |
| <i>Escherichia</i> | <i>coli</i>      | epHycE95                                                           | 0.7       |             | 2.27 | 37 |     | formate  | [66]      |
| <i>Escherichia</i> | <i>coli</i>      | FTD22                                                              | 0.8       |             |      | 30 | 6.8 | glucose  | [62]      |

|                    |             |                         |              |      |      |    |             |                                   |           |
|--------------------|-------------|-------------------------|--------------|------|------|----|-------------|-----------------------------------|-----------|
| <i>Escherichia</i> | <i>coli</i> | FTD67                   | 1.024        |      |      | 30 | 6.8         | glucose                           | [62]      |
| <i>Escherichia</i> | <i>coli</i> | FTD701                  |              | 0.36 |      | 30 | 7.3         | sucrose                           | [357]     |
| <i>Escherichia</i> | <i>coli</i> | FTD701<br>(recombinant) |              | 6.16 |      | 30 | 7.3         | sucrose                           | [357]     |
| <i>Escherichia</i> | <i>coli</i> | FTD89                   | 1.043        |      |      | 30 | 6.8         | glucose                           | [62]      |
| <i>Escherichia</i> | <i>coli</i> | HD701                   |              | 0.13 |      | 30 | 7.3         | sucrose                           | [357]     |
| <i>Escherichia</i> | <i>coli</i> | HD701                   | 0.375, 0.737 |      | 2.32 | 30 | 6.8         | glucose                           | [62, 358] |
| <i>Escherichia</i> | <i>coli</i> | HD701<br>(recombinant)  |              | 5.67 |      | 30 | 7.3         | sucrose                           | [357]     |
| <i>Escherichia</i> | <i>coli</i> | IC007 (recombinant)     | 0.76         |      |      | 30 | 5.5-<br>5.7 | glucose                           | [359]     |
| <i>Escherichia</i> | <i>coli</i> | K-12                    |              |      | 88.9 | 30 | 6.0         | gluconate                         | [90]      |
| <i>Escherichia</i> | <i>coli</i> | MC4100                  | 0.85         |      |      | 30 | 5.5-<br>5.7 | glucose                           | [359]     |
| <i>Escherichia</i> | <i>coli</i> | MC4100                  | 0.764        |      |      | 30 | 6.8         | glucose                           | [62]      |
| <i>Escherichia</i> | <i>coli</i> | MG1655                  | 0.935        |      |      | 37 | 6.3         | glycerol                          | [360]     |
| <i>Escherichia</i> | <i>coli</i> | NCIMB 11943             | 0.26         | 1.52 | 1.9  | 37 |             | 18 g/L corn starch<br>hydrolysate | [343]     |
| <i>Escherichia</i> | <i>coli</i> | NCIMB 11943             | 0.36         | 1.75 | 2.1  | 37 |             | 10 g/L corn starch<br>hydrolysate | [343]     |
| <i>Escherichia</i> | <i>coli</i> | NCIMB 11943             | 0.16         | 0.81 | 2.4  | 37 |             | 18 g/L glucose                    | [343]     |
| <i>Escherichia</i> | <i>coli</i> | NCIMB 11943             | 0.25         | 0.80 | 1.8  | 37 |             | 10 g/L glucose                    | [343]     |
| <i>Escherichia</i> | <i>coli</i> | NCIMB 11943             | 0.40         | 1.25 | 1.5  | 37 |             | 5 g/L glucose                     | [343]     |
| <i>Escherichia</i> | <i>coli</i> | NCIMB 11943             | 0.43         | 0.59 | 1.3  | 37 |             | 2 g/L glucose                     | [343]     |
| <i>Escherichia</i> | <i>coli</i> | R2                      | 0.75         |      |      | 35 | 6.2         | glucose                           | [352]     |
| <i>Escherichia</i> | <i>coli</i> | R2                      | 0.003        |      |      | 35 | 7.8         | glucose                           | [352]     |
| <i>Escherichia</i> | <i>coli</i> | shufHycE1-9             | 0.84         |      | 3    | 37 |             | formate                           | [66]      |
| <i>Escherichia</i> | <i>coli</i> | SR13                    |              | 28   |      | 37 | 6.5         | formate                           | [353]     |
| <i>Escherichia</i> | <i>coli</i> | SR13 (recombinant)      |              | 125  |      | 37 | 6.5         | formate                           | [63]      |
| <i>Escherichia</i> | <i>coli</i> | SR13 (recombinant)      | 0.95         | 9.1  |      | 37 | 6.0         | glucose                           | [354]     |
| <i>Escherichia</i> | <i>coli</i> | SR14                    |              | 37.4 |      | 37 | 6.0         | formate                           | [353]     |
| <i>Escherichia</i> | <i>coli</i> | SR14 (recombinant)      | 1.87         | 13   |      | 37 | 6.0         | glucose                           | [354]     |

|                              |                              |                    |         |         |         |    |     |                                             |       |
|------------------------------|------------------------------|--------------------|---------|---------|---------|----|-----|---------------------------------------------|-------|
| <i>Escherichia</i>           | <i>coli</i>                  | SR15 (recombinant) | 1.82    | 13.4    |         | 37 | 6.0 | glucose                                     | [354] |
| <i>Proteus</i>               | <i>mirabilis</i>             | EGU21              | 0.58    |         |         | 40 | 7.0 | glucose                                     | [316] |
| <i>Proteus</i>               | <i>mirabilis</i>             | EGU30              | 0.57    |         |         | 40 | 7.0 | glucose                                     | [316] |
| <i>Proteus</i>               | <i>mirabilis</i>             | EGU32              | 0.52    |         |         | 40 | 7.0 | glucose                                     | [316] |
| <i>Proteus</i>               | <i>mirabilis</i>             | EGU34              | 0.31    |         |         | 40 | 7.0 | glucose                                     | [316] |
| <i>Pseudomonas</i>           | sp.                          | EGU448             | 0.26    |         |         | 40 | 7.0 | glucose                                     | [316] |
| <i>Pseudomonas</i>           | <i>stutzeri</i>              | EGU394             | 0.47    |         |         | 40 | 7.0 | glucose                                     | [316] |
| <i>Pseudomonas</i>           | <i>stutzeri</i>              | EGU396             | 0.26    |         |         | 40 | 7.0 | glucose                                     | [316] |
| <i>Pyrococcus</i>            | <i>furius</i>                | DSM 3638           |         |         | 0.008   | 90 | 7   | yeast extract/peptone,<br>elemental sulphur | [361] |
| <i>Pyrococcus</i>            | <i>furius</i>                | DSM 3638           |         |         | 0.016   | 90 | 7   | yeast extract/peptone                       | [361] |
| <i>Thermoanaerobacter</i>    | <i>thermosaccharolyticum</i> | W16                | 2.24    |         | 4.92    | 60 | 7.0 | corn stover<br>hydrolysate                  | [362] |
| <i>Thermoanaerobacterium</i> | sp.                          | AK 17              | 1.2     |         |         | 58 | 6.0 | glucose                                     | [331] |
| <i>Thermoanaerobacterium</i> | sp.                          | AK 17              | 1.0     |         |         | 58 | 6.0 | xylose                                      | [331] |
| <i>Thermoanaerobacterium</i> | <i>thermosaccharolyticum</i> | KU001              | 1.42    |         | 0.95    | 60 | 5-6 | glucose                                     | [363] |
| <i>Thermoanaerobacterium</i> | <i>thermosaccharolyticum</i> | KU001              | 2.39    |         | 2.19    | 60 | 5-6 | glucose                                     | [363] |
| <i>Thermococcus</i>          | <i>litoralis</i>             | DSM5473            |         |         | 0.07    | 85 | 6.5 | 42 mg keratin<br>hydrolysate                | [78]  |
| <i>Thermococcus</i>          | <i>litoralis</i>             | DSM5473            |         |         | 0.07    | 85 | 6.5 | 84 mg keratin<br>hydrolysate                | [78]  |
| <i>Thermococcus</i>          | <i>litoralis</i>             | DSM5473            |         |         | 0.21    | 85 | 6.5 | 84 mg pepton                                | [78]  |
| <i>Thermococcus</i>          | <i>litoralis</i>             | DSM5473            |         |         | 0.14    | 85 | 6.5 | 42 mg peptone                               | [78]  |
| <i>Thermohydrogenium</i>     | <i>kirishi</i>               |                    | 0.53    |         |         |    |     | glucose                                     | [364] |
| <i>Thermotoga</i>            | <i>elfii</i>                 | DSM 9442           | 2.8-3.3 | 5.1-8.9 | 2.7-4.5 | 65 | 7.4 | glucose                                     | [57]  |
| <i>Thermotoga</i>            | <i>maritima</i>              | DSM 3109           | 0.09    |         |         | 80 | 6.5 | glucose                                     | [365] |
| <i>Thermotoga</i>            | <i>neapolitana</i>           | DSM 4359           | 2.6     |         |         | 77 | 7.7 | pretreated wheat<br>straw                   | [307] |
| <i>Thermotoga</i>            | <i>neapolitana</i>           | DSM 4359           | 2.0     |         | 5.4     | 80 | 6.8 | 28 g/L Miscanthus<br>biomass                | [320] |
| <i>Thermotoga</i>            | <i>neapolitana</i>           | DSM 4359           | 3.2     |         | 12.3    | 80 | 6.8 | 14 g/L Miscanthus<br>biomass                | [320] |
| <i>Thermotoga</i>            | <i>neapolitana</i>           | DSM 4359           | 2.9     |         | 13.1    | 80 | 6.8 | 10 g/L Miscanthus<br>biomass                | [320] |

|                                           |                                      |                    |          |  |      |    |      |                                                             |       |
|-------------------------------------------|--------------------------------------|--------------------|----------|--|------|----|------|-------------------------------------------------------------|-------|
| <i>Thermotoga</i>                         | <i>neapolitana</i>                   | DSM 4359           | 2.5      |  | 6.1  | 72 | 6.8  | 28 g/L glucose/xylose                                       | [320] |
| <i>Thermotoga</i>                         | <i>neapolitana</i>                   | DSM 4359           | 3.2      |  | 11.9 | 72 | 6.8  | 14 g/L glucose/xylose                                       | [320] |
| <i>Thermotoga</i>                         | <i>neapolitana</i>                   | DSM 4359           | 3.3      |  | 14.5 | 72 | 6.8  | 10 g/L glucose/xylose                                       | [320] |
| <i>Thermotoga</i>                         | <i>neapolitana</i>                   | DSM 4359           | 3.8      |  |      |    |      | glucose                                                     | [307] |
| <i>Thermotoga</i>                         | <i>neapolitana</i>                   | DSM 4359           | 2.9      |  | 12.3 | 75 | 6.9  | 10 g/L glucose                                              | [322] |
| <i>Thermotoga</i>                         | <i>neapolitana</i>                   | DSM 4359           | 3.0      |  | 12.4 | 75 | 6.9  | 30 g/L glucose                                              | [322] |
| <i>Thermotoga</i>                         | <i>neapolitana</i>                   | DSM 4359           | 2.6      |  | 10.6 | 75 | 6.9  | hydrolyzed and potato steam peels (one enzyme pretreatment) | [322] |
| <i>Thermotoga</i>                         | <i>neapolitana</i>                   | DSM 4359           | 3.3      |  | 8.9  | 75 | 6.9  | hydrolyzed and potato steam peels (two enzyme pretreatment) | [322] |
| <i>Thermotoga</i>                         | <i>neapolitana</i>                   | DSM 4359           | 3.8      |  | 12.5 | 75 | 6.9  | untreated potato steam peels                                | [322] |
|                                           |                                      | B2                 |          |  | 0.16 | 37 |      | carboxymethyl cellulose                                     | [366] |
|                                           |                                      | B2                 |          |  | 0.18 | 37 |      | microcrystalline cellulose                                  | [366] |
|                                           |                                      | C3                 |          |  | 0.61 | 37 |      | carboxymethyl cellulose                                     | [366] |
|                                           |                                      | C3                 |          |  | 0.66 | 37 |      | microcrystalline cellulose                                  | [366] |
|                                           |                                      | EGU409             | 0.39     |  |      | 40 | 7.0  | glucose                                                     | [316] |
|                                           |                                      | X9                 |          |  | 1.15 | 37 |      | carboxymethyl cellulose                                     | [366] |
|                                           |                                      | X9                 |          |  | 1.65 | 37 |      | microcrystalline cellulose                                  | [366] |
| <i>Clostridium</i><br><i>Enterobacter</i> | <i>butyricum</i><br><i>aerogenes</i> | IFO 13949<br>HO-39 | 1.7- 2.4 |  |      | 37 | 5.25 | 0.5% (w/v) starch                                           | [367] |
| <i>Clostridium</i><br><i>Enterobacter</i> | <i>butyricum</i><br><i>aerogenes</i> | IFO 13949<br>HO-39 | 1.5-2.4  |  |      | 37 | 5.25 | 0.75% (w/v) starch                                          | [367] |
| <i>Clostridium</i><br><i>Enterobacter</i> | <i>butyricum</i><br><i>aerogenes</i> | IFO 13949<br>HO-39 | 2.3      |  |      | 37 | 5.25 | 1% (w/v) starch                                             | [367] |
| <i>Clostridium</i><br><i>Enterobacter</i> | <i>butyricum</i><br><i>aerogenes</i> | IFO 13949<br>HO-39 | 2.3      |  |      | 37 | 5.25 | 1.5% (w/v) starch                                           | [367] |
| <i>Clostridium</i><br><i>Enterobacter</i> | <i>butyricum</i><br><i>aerogenes</i> | IFO 13949<br>HO-39 | 2.4      |  |      | 37 | 5.25 | 2% (w/v) starch                                             | [367] |
| <i>Clostridium</i><br><i>Enterobacter</i> | <i>butyricum</i><br><i>aerogenes</i> | IFO 13949<br>HO-39 | 2.7      |  |      | 37 | 5.25 | 1% (w/v) starch, corn steep liquor                          | [368] |

|                                                            |                                            |                       |     |      |      |    |     |                               |       |
|------------------------------------------------------------|--------------------------------------------|-----------------------|-----|------|------|----|-----|-------------------------------|-------|
| <i>Ethanoligenes</i>                                       | <i>harbinense</i>                          | B49<br>B2             |     |      | 2.8  | 37 | 7.0 | microcrystalline<br>cellulose | [366] |
| <i>Ethanoligenes</i>                                       | <i>harbinense</i>                          | B49<br>C3             |     |      | 2.19 | 37 | 7.0 | microcrystalline<br>cellulose | [366] |
|                                                            |                                            | B2<br>C3              |     |      | 2.57 | 37 | 7.0 | microcrystalline<br>cellulose | [366] |
| <i>Ethanoligenes</i>                                       | <i>harbinense</i>                          | B49<br>X9             |     |      | 5.38 | 37 | 7.0 | microcrystalline<br>cellulose | [366] |
|                                                            |                                            | X2<br>B2              |     |      | 5    | 37 | 7.0 | microcrystalline<br>cellulose | [366] |
|                                                            |                                            | X9<br>C3              |     |      | 3.84 | 37 | 7.0 | microcrystalline<br>cellulose | [366] |
| <i>Ethanoligenes</i>                                       | <i>harbinense</i>                          | B49<br>B2             |     |      | 2.35 | 37 | 7.0 | carboxymethyl<br>cellulose    | [366] |
| <i>Ethanoligenes</i>                                       | <i>harbinense</i>                          | B49<br>C3             |     |      | 2.09 | 37 | 7.0 | carboxymethyl<br>cellulose    | [366] |
|                                                            |                                            | B2<br>C3              |     |      | 2.77 | 37 | 7.0 | carboxymethyl<br>cellulose    | [366] |
| <i>Ethanoligenes</i>                                       | <i>harbinense</i>                          | B49<br>X9             |     |      | 5.21 | 37 | 7.0 | carboxymethyl<br>cellulose    | [366] |
|                                                            |                                            | X2<br>B2              |     |      | 4.31 | 37 | 7.0 | carboxymethyl<br>cellulose    | [366] |
|                                                            |                                            | X9<br>C3              |     |      | 4.31 | 37 | 7.0 | carboxymethyl<br>cellulose    | [366] |
| <i>Caldicellulosiruptor</i><br><i>Caldicellulosiruptor</i> | <i>saccharolyticus</i><br><i>ownsensis</i> | DSM 8903<br>DSM 13100 | 3.3 | 38   | 16   | 70 | 6.5 | glucose/xylose                | [49]  |
| <i>Caldicellulosiruptor</i><br><i>Caldicellulosiruptor</i> | <i>saccharolyticus</i><br><i>ownsensis</i> | DSM 8903<br>DSM 13100 | 3.8 | 19   | 17   | 70 | 6.5 | glucose/xylose                | [49]  |
| <i>Clostridium</i><br><i>Ethanoligenes</i>                 | <i>acetobutylicum</i><br><i>harbinense</i> | X9<br>B49             |     | 55.4 |      | 37 | 4.8 | microcrystalline<br>cellulose | [369] |

\* for reference please refer to manuscript
