# Supplementary material for: A comprehensive and quantitative review of dark fermentative biohydrogen production
Source: PubMed Central journal article supplement (PMC3443015; doi:10.1186/1475-2859-11-115), 2012-08-27
Supplement: 1475-2859-11-115-S4.pdf [file 1475-2859-11-115-S4.pdf]

**Additional file 4:** Chemostat culture dark fermentative biohydrogen production

| Genus                       | Species                | Strain    | $Y_{(H_2/S)}$<br>[mol mol <sup>-1</sup> ] | $q_{H_2}$<br>[mmol g <sup>-1</sup> h <sup>-1</sup> ] | HER<br>[mmol L <sup>-1</sup> h <sup>-1</sup> ] | Temperature<br>[°C] | pH  | Dilution rate<br>[h <sup>-1</sup> ] | Main substrate and<br>discriminative condition | Reference <sup>+</sup> |
|-----------------------------|------------------------|-----------|-------------------------------------------|------------------------------------------------------|------------------------------------------------|---------------------|-----|-------------------------------------|------------------------------------------------|------------------------|
| <i>Bacillus</i>             | <i>licheniformis</i>   | JK1       | 0.58                                      |                                                      |                                                | 40                  | 7.0 |                                     | glucose, free cells                            | [96]                   |
| <i>Bacillus</i>             | <i>licheniformis</i>   | JK1       | 0.67                                      |                                                      |                                                | 40                  | 7.0 |                                     | glucose, immobilized cells                     | [96]                   |
| <i>Caldicellulosiruptor</i> | <i>kristjanssonii</i>  | DSM 12137 | 3.5                                       | 17.8                                                 | 4.8                                            | 70                  | 6.7 | 0.06                                | glucose                                        | [34]                   |
| <i>Caldicellulosiruptor</i> | <i>kristjanssonii</i>  | DSM 12137 | 3.0                                       | 34.6                                                 | 10.3                                           | 70                  | 6.7 | 0.15                                | glucose                                        | [34]                   |
| <i>Caldicellulosiruptor</i> | <i>saccharolyticus</i> | DSM 8903  | 3.5                                       | 13.2                                                 | 4.9                                            | 70                  | 6.7 | 0.06                                | glucose                                        | [34]                   |
| <i>Caldicellulosiruptor</i> | <i>saccharolyticus</i> | DSM 8903  | 3.1                                       | 24.4                                                 | 7                                              | 70                  | 6.7 | 0.15                                | glucose                                        | [34]                   |
| <i>Caldicellulosiruptor</i> | <i>saccharolyticus</i> | DSM 8903  | 3.3                                       | 9.3                                                  | 4.2                                            | 72                  | 6.7 | 0.05                                | 4.4 g/L glucose                                | [46]                   |
| <i>Caldicellulosiruptor</i> | <i>saccharolyticus</i> | DSM 8903  | 4.0                                       | 13.3                                                 | 4                                              | 72                  | 6.7 | 0.09                                | 1.9 g/L glucose                                | [46]                   |
| <i>Caldicellulosiruptor</i> | <i>saccharolyticus</i> | DSM 8903  | 3.5                                       | 14.5                                                 | 7.7                                            | 72                  | 6.7 | 0.10                                | 1.9 g/L glucose                                | [46]                   |
| <i>Caldicellulosiruptor</i> | <i>saccharolyticus</i> | DSM 8903  | 3.6                                       | 14.5                                                 | 8.9                                            | 72                  | 6.7 | 0.10                                | 4.4 g/L glucose                                | [46]                   |
| <i>Caldicellulosiruptor</i> | <i>saccharolyticus</i> | DSM 8903  | 2.9                                       | 16.4                                                 | 9.5                                            | 72                  | 6.7 | 0.15                                | 4.4 g/L glucose                                | [46]                   |
| <i>Caldicellulosiruptor</i> | <i>saccharolyticus</i> | DSM 8903  | 2.9                                       | 20.2                                                 | 9.1                                            | 72                  | 6.7 | 0.20                                | 4.4 g/L glucose                                | [46]                   |
| <i>Caldicellulosiruptor</i> | <i>saccharolyticus</i> | DSM 8903  | 3.1                                       | 27.0                                                 | 11                                             | 72                  | 6.7 | 0.30                                | 4.4 g/L glucose                                | [46]                   |
| <i>Caldicellulosiruptor</i> | <i>saccharolyticus</i> | DSM 8903  | 3.1-3.3                                   | 25.6-26.5                                            | 9.9-11.6                                       | 72                  | 6.7 | 0.30                                | 4.1 g/L glucose                                | [46]                   |
| <i>Caldicellulosiruptor</i> | <i>saccharolyticus</i> | DSM 8903  | 3.0                                       | 29.8                                                 | 12.4                                           | 72                  | 6.7 | 0.35                                | 4.4 g/L glucose                                | [46]                   |
| <i>Caldicellulosiruptor</i> | <i>saccharolyticus</i> | DSM 8903  | 2.8                                       |                                                      | 22                                             | 73                  | 6.5 |                                     | sucrose                                        | [75]                   |
| <i>Clostridium</i>          | <i>acetobutylicum</i>  | ATCC 824  |                                           |                                                      | 3.3                                            | 30                  | 6.2 |                                     | 1.0 g/L glucose                                | [370]                  |
| <i>Clostridium</i>          | <i>acetobutylicum</i>  | ATCC 824  |                                           |                                                      | 6.5                                            | 30                  | 6.2 |                                     | 3.3 g/L glucose                                | [370]                  |
| <i>Clostridium</i>          | <i>acetobutylicum</i>  | ATCC 824  |                                           |                                                      | 8.1                                            | 30                  | 6.2 |                                     | 4.5 g/L glucose                                | [370]                  |
| <i>Clostridium</i>          | <i>acetobutylicum</i>  | ATCC 824  |                                           |                                                      | 8.9                                            | 30                  | 6.2 |                                     | 10.5 g/L glucose                               | [370]                  |
| <i>Clostridium</i>          | <i>acetobutylicum</i>  | ATCC 824  |                                           | 19                                                   | 19                                             | 35                  | 6.5 | 0.05                                | glucose                                        | [371]                  |
| <i>Clostridium</i>          | <i>acetobutylicum</i>  | ATCC 824  |                                           | 8                                                    | 8                                              | 35                  | 6.5 | 0.05                                | glycerol/glucose (molar ratio 1:1)             | [371]                  |
| <i>Clostridium</i>          | <i>acetobutylicum</i>  | ATCC 824  |                                           | 6                                                    | 6                                              | 35                  | 6.5 | 0.05                                | glycerol/glucose (molar ratio 2:1)             | [371]                  |
| <i>Clostridium</i>          | <i>acetobutylicum</i>  | ATCC 824  |                                           | 6                                                    | 6                                              | 35                  | 6.5 | 0.05                                | glycerol/glucose (molar ratio 3.7:1)           | [371]                  |

|                    |                       |           |       |      |       |    |     |       |                                                                         |       |
|--------------------|-----------------------|-----------|-------|------|-------|----|-----|-------|-------------------------------------------------------------------------|-------|
| <i>Clostridium</i> | <i>acetobutylicum</i> | ATCC 824  | 1.9   |      | 14.5  | 37 | 6   |       | glucose                                                                 | [372] |
| <i>Clostridium</i> | <i>butyricum</i>      | CGS5      | 2.73  |      | 11.55 | 37 | 6.5 | 0.083 | Sucrose, Endo medium                                                    | [29]  |
| <i>Clostridium</i> | <i>butyricum</i>      | CGS5      | 3.33  |      | 13.05 | 37 | 6.5 | 0.083 | Sucrose, Endo medium 1                                                  | [29]  |
| <i>Clostridium</i> | <i>butyricum</i>      | CGS5      | 6.56  |      | 29.78 | 37 | 6.5 | 0.083 | Sucrose, Endo medium 2                                                  | [29]  |
| <i>Clostridium</i> | <i>butyricum</i>      | DSM 5431  |       | 36.5 |       | 33 | 7.0 |       | glycerol                                                                | [118] |
| <i>Clostridium</i> | <i>butyricum</i>      | IFO 13949 | 2.3   |      | 31.9  | 36 | 4.7 | 0.5   | glucose                                                                 | [373] |
| <i>Clostridium</i> | <i>butyricum</i>      | IFO 13949 | 1.9   |      | 51.31 | 36 | 4.7 | 1     | glucose                                                                 | [373] |
| <i>Clostridium</i> | <i>butyricum</i>      | IFO 13949 | 1.9   |      | 20.52 | 36 | 5.5 | 0.2   | starch                                                                  | [122] |
| <i>Clostridium</i> | <i>butyricum</i>      | IFO 13949 |       |      | 18.29 | 36 | 6.5 | 0.33  | glucose, free cells                                                     | [373] |
| <i>Clostridium</i> | <i>butyricum</i>      | IFO 13949 |       |      | 24.4  | 36 | 6.5 | 0.33  | glucose, cells immobilized on porous glass beads                        | [373] |
| <i>Clostridium</i> | <i>butyricum</i>      | IFO 13949 |       |      | 16.64 | 36 | 6.5 | 0.33  | glucose, cells immobilized in agar gel                                  | [373] |
| <i>Clostridium</i> | <i>butyricum</i>      | IFO 13949 |       |      | 13.83 | 36 | 6.5 | 0.2   | glucose, free cells                                                     | [373] |
| <i>Clostridium</i> | <i>butyricum</i>      | IFO 13949 |       |      | 15    | 36 | 6.5 | 0.2   | glucose, cells immobilized on porous glass beads                        | [373] |
| <i>Clostridium</i> | <i>butyricum</i>      | IFO 13949 |       |      | 10.13 | 36 | 6.5 | 0.2   | glucose, cells immobilized in agar gel                                  | [373] |
| <i>Clostridium</i> | <i>butyricum</i>      | LMG 1212  | 0.05  |      |       |    | 6.0 | 0.084 | glycerol, 10 mM acetate                                                 | [124] |
| <i>Clostridium</i> | <i>butyricum</i>      | LMG 1212  | 0.15  |      |       |    | 6.0 | 0.084 | glycerol, 20 mM acetate                                                 | [124] |
| <i>Clostridium</i> | <i>butyricum</i>      | LMG 1212  | 0.27  |      |       |    | 6.0 | 0.084 | glycerol, 40 mM acetate                                                 | [124] |
| <i>Clostridium</i> | <i>butyricum</i>      | LMG 1212  | 0.38  |      |       |    | 6.0 | 0.084 | glycerol, 80 mM acetate                                                 | [124] |
| <i>Clostridium</i> | <i>butyricum</i>      | LMG 1213  | 1.78  |      |       |    | 5.0 | 0.061 | glucose, phosphate limitation (0.1 mM KH <sub>2</sub> PO <sub>4</sub> ) | [374] |
| <i>Clostridium</i> | <i>butyricum</i>      | LMG 1213  | 0.004 |      |       |    | 5.0 | 0.081 | glucose, ammonium limitation                                            | [374] |
| <i>Clostridium</i> | <i>butyricum</i>      | LMG 1213  | 2.02  |      |       |    | 6.0 | 0.061 | glucose, phosphate limitation (0.1 mM KH <sub>2</sub> PO <sub>4</sub> ) | [374] |
| <i>Clostridium</i> | <i>butyricum</i>      | LMG 1213  | 1.79  |      |       |    | 6.0 | 0.081 | glucose, ammonium limitation                                            | [374] |
| <i>Clostridium</i> | <i>butyricum</i>      | LMG 1213  | 1.79  |      |       |    | 7.0 | 0.061 | glucose, phosphate limitation (0.1 mM KH <sub>2</sub> PO <sub>4</sub> ) | [374] |

|                    |                  |          |      |  |  |    |         |       |                                                                             |       |
|--------------------|------------------|----------|------|--|--|----|---------|-------|-----------------------------------------------------------------------------|-------|
| <i>Clostridium</i> | <i>butyricum</i> | LMG 1213 | 2.22 |  |  |    | 7.0     | 0.061 | glucose, ammonium limitation                                                | [374] |
| <i>Clostridium</i> | <i>butyricum</i> | LMG 1213 | 1.56 |  |  |    | 7.0     | 0.081 | glucose, phosphate limitation (0.5 mM KH <sub>2</sub> PO <sub>4</sub> )     | [374] |
| <i>Clostridium</i> | <i>butyricum</i> | LMG 1213 | 2.07 |  |  |    | 5.5-7.0 | 0.079 | xylose                                                                      | [375] |
| <i>Clostridium</i> | <i>butyricum</i> | LMG 1213 | 2.31 |  |  |    | 5.5-7.0 | 0.079 | glucose                                                                     | [375] |
| <i>Clostridium</i> | <i>butyricum</i> | LMG 1213 | 1.62 |  |  |    | 6.0     | 0.035 | 10g/L xylose                                                                | [375] |
| <i>Clostridium</i> | <i>butyricum</i> | LMG 1213 | 1.87 |  |  |    | 6.0     | 0.081 | 40 g/L xylose                                                               | [375] |
| <i>Clostridium</i> | <i>butyricum</i> | LMG 1213 | 1.81 |  |  |    | 6.0     | 0.087 | xylose/glucose (ratio: 0.33:1)                                              | [375] |
| <i>Clostridium</i> | <i>butyricum</i> | LMG 1213 | 1.81 |  |  |    | 6.0     | 0.087 | xylose/glucose (ratio: 1:1)                                                 | [375] |
| <i>Clostridium</i> | <i>butyricum</i> | LMG 1213 | 1.81 |  |  |    | 6.0     | 0.087 | xylose/glucose (ratio: 3:1)                                                 | [375] |
| <i>Clostridium</i> | <i>butyricum</i> | LMG 1213 | 1.99 |  |  |    | 6.0     | 0.087 | mannitol, acetate 0.42 mmol h <sup>-1</sup>                                 | [125] |
| <i>Clostridium</i> | <i>butyricum</i> | LMG 1213 | 2.23 |  |  |    | 6.0     | 0.087 | mannitol, acetate 0.78 mmol h <sup>-1</sup>                                 | [125] |
| <i>Clostridium</i> | <i>butyricum</i> | LMG 1213 | 2.43 |  |  |    | 6.0     | 0.087 | mannitol, acetate 1.63 mmol h <sup>-1</sup>                                 | [125] |
| <i>Clostridium</i> | <i>butyricum</i> | LMG 1213 | 2.54 |  |  |    | 6.0     | 0.087 | mannitol, acetate 2.71 mmol h <sup>-1</sup>                                 | [125] |
| <i>Clostridium</i> | <i>butyricum</i> | LMG 1213 | 2.04 |  |  |    | 6.0     | 0.087 | mannitol (5.23 mmol h <sup>-1</sup> ), glucose (0.64 mmol h <sup>-1</sup> ) | [125] |
| <i>Clostridium</i> | <i>butyricum</i> | LMG 1213 | 2.23 |  |  |    | 6.0     | 0.087 | mannitol (3.88 mmol h <sup>-1</sup> ), glucose (1.96 mmol h <sup>-1</sup> ) | [125] |
| <i>Clostridium</i> | <i>butyricum</i> | LMG 1213 | 2.37 |  |  |    | 6.0     | 0.087 | mannitol (7.25 mmol h <sup>-1</sup> ), glucose (1.83 mmol h <sup>-1</sup> ) | [125] |
| <i>Clostridium</i> | <i>butyricum</i> | LMG 1213 | 1.63 |  |  |    | 6.0     | 0.093 | xylose                                                                      | [375] |
| <i>Clostridium</i> | <i>butyricum</i> | LMG 1213 | 1.64 |  |  |    | 6.0     | 0.108 | xylose                                                                      | [375] |
| <i>Clostridium</i> | <i>butyricum</i> | LMG 1213 | 1.69 |  |  |    | 6.0     | 0.133 | xylose                                                                      | [375] |
| <i>Clostridium</i> | <i>butyricum</i> | LMG 1213 | 1.83 |  |  |    | 6.0     | 0.156 | xylose                                                                      | [375] |
| <i>Clostridium</i> | <i>butyricum</i> | LMG 1213 | 1.85 |  |  |    | 6.0     | 0.195 | xylose                                                                      | [375] |
| <i>Clostridium</i> | <i>butyricum</i> | SC-E1    | 2.0  |  |  | 30 | 6.7     | 0.125 | 0,5% (w/v) glucose                                                          | [228] |
| <i>Clostridium</i> | <i>butyricum</i> | SC-E1    | 2.2  |  |  | 30 | 6.7     | 0.125 | 0,5% (w/v) glucose, vakuum condition                                        | [228] |

|                    |                     |          |      |      |       |    |      |       |                                    |       |
|--------------------|---------------------|----------|------|------|-------|----|------|-------|------------------------------------|-------|
| <i>Clostridium</i> | <i>butyricum</i>    | SC-E1    | 2.3  |      |       | 30 | 6.7  | 0.125 | 1% (w/v) glucose                   | [228] |
| <i>Clostridium</i> | <i>butyricum</i>    | SC-E1    | 2.3  |      |       | 30 | 6.7  | 0.125 | 1% (w/v) glucose, vakuum condition | [228] |
| <i>Clostridium</i> | <i>butyricum</i>    | VPI 3266 |      | 11.3 |       | 35 | 6.5  | 0.05  | glucose                            | [376] |
| <i>Clostridium</i> | <i>butyricum</i>    | VPI 3266 |      | 0.39 |       | 35 | 6.5  | 0.05  | glucose/glycerol                   | [376] |
| <i>Clostridium</i> | <i>pasteurianum</i> | LMG 3285 | 2.16 |      |       |    | 5.0  | 0.081 | glucose                            | [374] |
| <i>Clostridium</i> | <i>pasteurianum</i> | LMG 3285 | 1.90 |      |       |    | 5.5  | 0.061 | glucose                            | [374] |
| <i>Clostridium</i> | <i>pasteurianum</i> | LMG 3285 | 1.82 |      |       |    | 6.0  | 0.061 | glucose                            | [374] |
| <i>Clostridium</i> | <i>pasteurianum</i> | LMG 3285 | 2.04 |      |       |    | 6.0  | 0.081 | glucose                            | [374] |
| <i>Clostridium</i> | <i>pasteurianum</i> | LMG 3285 | 1.41 |      |       |    | 7.0  | 0.061 | glucose                            | [374] |
| <i>Clostridium</i> | <i>pasteurianum</i> | LMG 3285 | 2.03 |      |       |    | 7.0  | 0.081 | glucose                            | [374] |
| <i>Clostridium</i> | <i>pasteurianum</i> | LMG 3285 | 1.50 |      |       |    | 7.5  | 0.061 | glucose                            | [374] |
| <i>Clostridium</i> | <i>pasteurianum</i> | LMG 3285 | 2.10 |      |       |    | 7.5  | 0.081 | glucose                            | [374] |
| <i>Clostridium</i> | <i>pasteurianum</i> | LMG 8285 | 0.87 |      |       |    | 6.0  | 0.096 | glycerol                           | [124] |
| <i>Clostridium</i> | <i>pasteurianum</i> | LMG 8285 | 0.85 |      |       |    | 6.0  | 0.096 | glycerol, 10 mM acetate            | [124] |
| <i>Clostridium</i> | <i>pasteurianum</i> | LMG 8285 | 1.05 |      |       |    | 6.0  | 0.096 | glycerol, 20 mM acetate            | [124] |
| <i>Clostridium</i> | sp.                 | No.2     | 4.46 |      | 4.1   | 36 | 6.0  | 0.17  | avicel hydrolysate                 | [377] |
| <i>Clostridium</i> | sp.                 | No.2     | 2.14 |      | 1.78  | 36 | 6.0  | 0.17  | glucose                            | [377] |
| <i>Clostridium</i> | sp.                 | No.2     | 2.36 | 13.9 | 7.07  | 36 | 4.81 | 0.18  | xylose                             | [378] |
| <i>Clostridium</i> | sp.                 | No.2     | 2.04 | 16.8 | 11.9  | 36 | 4.84 | 0.40  | glucose                            | [378] |
| <i>Clostridium</i> | sp.                 | No.2     | 1.72 | 22.6 | 14.23 | 36 | 4.92 | 0.63  | glucose                            | [378] |
| <i>Clostridium</i> | sp.                 | No.2     | 1.65 | 15.6 | 11.67 | 36 | 5.00 | 0.42  | xylose                             | [378] |
| <i>Clostridium</i> | sp.                 | No.2     | 1.82 | 9.7  | 7.63  | 36 | 5.03 | 0.21  | xylose                             | [378] |
| <i>Clostridium</i> | sp.                 | No.2     | 1.61 | 27.4 | 15.33 | 36 | 5.03 | 0.82  | glucose                            | [378] |
| <i>Clostridium</i> | sp.                 | No.2     | 1.64 | 32.7 | 16    | 36 | 5.09 | 1.04  | glucose                            | [378] |
| <i>Clostridium</i> | sp.                 | No.2     | 1.50 | 21   | 13.67 | 36 | 5.11 | 0.59  | xylose                             | [378] |
| <i>Clostridium</i> | sp.                 | No.2     | 1.47 | 39   | 16    | 36 | 5.16 | 1.03  | xylose                             | [378] |
| <i>Clostridium</i> | sp.                 | No.2     | 1.69 | 31.2 | 13.4  | 36 | 5.21 | 1.20  | glucose                            | [378] |
| <i>Clostridium</i> | sp.                 | No.2     | 1.36 | 30.3 | 15.17 | 36 | 5.31 | 0.82  | xylose                             | [378] |

|                    |                     |          |      |      |       |    |      |       |                                                                                         |       |
|--------------------|---------------------|----------|------|------|-------|----|------|-------|-----------------------------------------------------------------------------------------|-------|
| <i>Clostridium</i> | sp.                 | No.2     | 1.68 | 37.2 | 11.9  | 36 | 5.64 | 1.22  | xylose                                                                                  | [378] |
| <i>Clostridium</i> | sp.                 | No.2     | 2.15 | 7.8  | 6.8   | 36 | 6.0  | 0.19  | glucose                                                                                 | [378] |
| <i>Clostridium</i> | sp.                 | No.2     | 2.06 | 10.4 | 8.57  | 36 | 6.0  | 0.21  | xylose                                                                                  | [378] |
| <i>Clostridium</i> | sp.                 | No.2     | 2.06 | 16.7 | 13.7  | 36 | 6.0  | 0.40  | glucose                                                                                 | [378] |
| <i>Clostridium</i> | sp.                 | No.2     | 2.01 | 19.2 | 13.47 | 36 | 6.0  | 0.42  | xylose                                                                                  | [378] |
| <i>Clostridium</i> | sp.                 | No.2     | 1.55 | 19   | 15.94 | 36 | 6.0  | 0.62  | glucose                                                                                 | [378] |
| <i>Clostridium</i> | sp.                 | No.2     | 1.65 | 25.4 | 17.5  | 36 | 6.0  | 0.63  | xylose                                                                                  | [378] |
| <i>Clostridium</i> | sp.                 | No.2     | 1.78 | 29.5 | 18.3  | 36 | 6.0  | 0.76  | xylose                                                                                  | [378] |
| <i>Clostridium</i> | sp.                 | No.2     | 1.33 | 22.2 | 18.23 | 36 | 6.0  | 0.84  | glucose                                                                                 | [378] |
| <i>Clostridium</i> | sp.                 | No.2     | 1.39 | 28.9 | 19.33 | 36 | 6.0  | 0.90  | glucose                                                                                 | [378] |
| <i>Clostridium</i> | sp.                 | No.2     | 1.74 | 36.3 | 21.03 | 36 | 6.0  | 0.96  | xylose                                                                                  | [378] |
| <i>Clostridium</i> | sp.                 | No.2     | 1.45 | 34   | 20.4  | 36 | 6.0  | 1.16  | glucose                                                                                 | [378] |
| <i>Clostridium</i> | sp.                 | No.2     | 1.37 | 37.6 | 17.3  | 36 | 6.0  | 1.16  | xylose                                                                                  | [378] |
| <i>Clostridium</i> | sp.                 | No.2     | 1.35 | 32.2 | 15.43 | 36 | 6.0  | 1.28  | glucose                                                                                 | [378] |
| <i>Clostridium</i> | sp.                 | No.2     | 1.30 | 41.9 | 15.07 | 36 | 6.0  | 1.30  | xylose                                                                                  | [378] |
| <i>Clostridium</i> | <i>stercorarium</i> | DSM 2910 | 4.4  |      |       | 58 | 6.8  | 0.024 | lactose, co-culture with <i>M. thermoautotrophicus</i>                                  | [77]  |
| <i>Clostridium</i> | <i>stercorarium</i> | DSM 2910 | 4.8  |      |       | 58 | 6.8  | 0.024 | lactose, co-culture with <i>M. thermoautotrophicus</i> and <i>M. thermoautotrophica</i> | [77]  |
| <i>Clostridium</i> | <i>stercorarium</i> | DSM 2910 | 4.8  |      |       | 58 | 6.8  | 0.029 | lactose, co-culture with <i>M. thermoautotrophicus</i> and <i>M. thermoautotrophica</i> | [77]  |
| <i>Clostridium</i> | <i>stercorarium</i> | DSM 2910 | 6.4  |      |       | 58 | 6.8  | 0.029 | lactose, co-culture with <i>M. thermoautotrophicus</i>                                  | [77]  |
| <i>Clostridium</i> | <i>stercorarium</i> | DSM 2910 | 4.8  |      |       | 58 | 6.8  | 0.040 | lactose, co-culture with <i>M. thermoautotrophicus</i> and <i>M. thermoautotrophica</i> | [77]  |
| <i>Clostridium</i> | <i>stercorarium</i> | DSM 2910 | 5.6  |      |       | 58 | 6.8  | 0.040 | lactose, co-culture with <i>M. thermoautotrophicus</i>                                  | [77]  |
| <i>Clostridium</i> | <i>stercorarium</i> | DSM 2910 | 5.6  |      |       | 58 | 6.8  | 0.055 | lactose, co-culture with <i>M. thermoautotrophicus</i>                                  | [77]  |
| <i>Clostridium</i> | <i>stercorarium</i> | DSM 2910 | 6    |      |       | 58 | 6.8  | 0.055 | lactose, co-culture with <i>M. thermoautotrophicus</i> and <i>M. thermoautotrophica</i> | [77]  |

|                    |                              |            |      |     |      |    |     |       |                                                                                         |            |
|--------------------|------------------------------|------------|------|-----|------|----|-----|-------|-----------------------------------------------------------------------------------------|------------|
| <i>Clostridium</i> | <i>stercorarium</i>          | DSM 2910   | 5.2  |     |      | 58 | 6.8 | 0.067 | lactose, co-culture with <i>M. thermoautotrophicus</i>                                  | [77]       |
| <i>Clostridium</i> | <i>stercorarium</i>          | DSM 2910   | 6    |     |      | 58 | 6.8 | 0.067 | lactose, co-culture with <i>M. thermoautotrophicus</i> and <i>M. thermoautotrophica</i> | [77]       |
| <i>Clostridium</i> | <i>stercorarium</i>          | DSM 2910   | 5.2  |     |      | 58 | 6.8 | 0.072 | lactose, co-culture with <i>M. thermoautotrophicus</i>                                  | [77]       |
| <i>Clostridium</i> | <i>stercorarium</i>          | DSM 2910   | 5.2  |     |      | 58 | 6.8 | 0.072 | lactose, co-culture with <i>M. thermoautotrophicus</i> and <i>M. thermoautotrophica</i> | [77]       |
| <i>Clostridium</i> | <i>stercorarium</i>          | DSM 2910   | 4.4  |     |      | 58 | 6.8 | 0.100 | lactose, co-culture with <i>M. thermoautotrophicus</i> and <i>M. thermoautotrophica</i> | [77]       |
| <i>Clostridium</i> | <i>stercorarium</i>          | DSM 2910   | 4.8  |     |      | 58 | 6.8 | 0.100 | lactose, co-culture with <i>M. thermoautotrophicus</i>                                  | [77]       |
| <i>Clostridium</i> | <i>stercorarium</i>          | DSM 2910   | 2.3  | 1.4 | 0.85 | 58 | 7.0 | 0.013 | lactose                                                                                 | [379, 380] |
| <i>Clostridium</i> | <i>stercorarium</i>          | DSM 2910   | 3    | 3.2 | 2.18 | 58 | 7.0 | 0.028 | lactose                                                                                 | [380]      |
| <i>Clostridium</i> | <i>stercorarium</i>          | DSM 2910   | 2.8  | 3.7 | 2.44 | 58 | 7.0 | 0.040 | lactose                                                                                 | [380]      |
| <i>Clostridium</i> | <i>stercorarium</i>          | DSM 2910   | 2.7  | 4.4 | 2.55 | 58 | 7.0 | 0.058 | lactose                                                                                 | [380]      |
| <i>Clostridium</i> | <i>stercorarium</i>          | DSM 2910   | 2.4  | 5.1 | 2.46 | 58 | 7.0 | 0.082 | lactose                                                                                 | [380]      |
| <i>Clostridium</i> | <i>stercorarium</i>          | DSM 2910   | 2.1  | 4.9 | 2.31 | 58 | 7.0 | 0.105 | lactose                                                                                 | [380]      |
| <i>Clostridium</i> | <i>stercorarium</i>          | DSM 2910   | 2.1  | 5.3 | 2.21 | 58 | 7.0 | 0.130 | lactose                                                                                 | [380]      |
| <i>Clostridium</i> | <i>stercorarium</i>          | DSM 2910   | 2.3  | 5.4 | 2.1  | 58 | 7.0 | 0.150 | lactose                                                                                 | [380]      |
| <i>Clostridium</i> | <i>stercorarium</i>          | DSM 2910   | 2.5  | 5.6 | 1.52 | 58 | 7.0 | 0.190 | lactose                                                                                 | [380]      |
| <i>Clostridium</i> | <i>thermocellum</i>          | ATCC 27405 | 0.98 |     | 0.29 | 60 | 7.0 | 0.04  | 1.5 g/L cellulose                                                                       | [381]      |
| <i>Clostridium</i> | <i>thermocellum</i>          | ATCC 27405 | 1.29 |     | 1.01 | 60 | 7.0 | 0.04  | 4 g/L cellulose                                                                         | [381]      |
| <i>Clostridium</i> | <i>thermocellum</i>          | ATCC 27405 | 1.53 |     | 0.75 | 60 | 7.0 | 0.04  | 3 g/L cellulose                                                                         | [381]      |
| <i>Clostridium</i> | <i>thermocellum</i>          | ATCC 27405 | 1.65 |     | 0.58 | 60 | 7.0 | 0.04  | 2 g/L cellulose                                                                         | [381]      |
| <i>Clostridium</i> | <i>thermosaccharolyticum</i> | LMG 6564   | 1.72 |     |      | 55 | 5.4 | 0.10  | glucose                                                                                 | [382]      |
| <i>Clostridium</i> | <i>thermosaccharolyticum</i> | LMG 6564   | 1.56 |     |      | 55 | 6.0 | 0.09  | glucose                                                                                 | [382]      |
| <i>Clostridium</i> | <i>thermosaccharolyticum</i> | LMG 6564   | 1.36 |     |      | 55 | 6.0 | 0.10  | glucose                                                                                 | [382]      |
| <i>Clostridium</i> | <i>thermosaccharolyticum</i> | LMG 6564   | 1.04 |     |      | 55 | 6.8 | 0.08  | glucose                                                                                 | [382]      |
| <i>Clostridium</i> | <i>thermosaccharolyticum</i> | LMG 6564   | 1.22 |     |      | 55 | 7.0 | 0.03  | glucose                                                                                 | [382]      |
| <i>Clostridium</i> | <i>thermosaccharolyticum</i> | LMG 6564   | 1.00 |     |      | 55 | 7.0 | 0.05  | glucose                                                                                 | [382]      |

|                    |                              |            |      |  |      |    |     |       |                                      |       |
|--------------------|------------------------------|------------|------|--|------|----|-----|-------|--------------------------------------|-------|
| <i>Clostridium</i> | <i>thermosaccharolyticum</i> | LMG 6564   | 1.04 |  |      | 55 | 7.0 | 0.08  | glucose                              | [382] |
| <i>Clostridium</i> | <i>thermosaccharolyticum</i> | LMG 6564   | 0.74 |  |      | 55 | 7.0 | 0.09  | glucose                              | [382] |
| <i>Clostridium</i> | <i>tyrobutyricum</i>         | JM1        |      |  | 2.05 | 37 | 6.7 | 0.042 | glucose                              | [383] |
| <i>Clostridium</i> | <i>tyrobutyricum</i>         | JM1        |      |  | 2.6  | 37 | 6.7 | 0.056 | glucose                              | [383] |
| <i>Clostridium</i> | <i>tyrobutyricum</i>         | JM1        |      |  | 3.81 | 37 | 6.7 | 0.083 | glucose                              | [383] |
| <i>Clostridium</i> | <i>tyrobutyricum</i>         | JM1        |      |  | 4.65 | 37 | 6.7 | 0.11  | glucose                              | [383] |
| <i>Clostridium</i> | <i>tyrobutyricum</i>         | JM1        |      |  | 7.44 | 37 | 6.7 | 0.25  | glucose                              | [383] |
| <i>Clostridium</i> | <i>tyrobutyricum</i>         | JM1        |      |  | 11.2 | 37 | 6.7 | 0.33  | glucose                              | [383] |
| <i>Clostridium</i> | <i>tyrobutyricum</i>         | JM1        |      |  | 13.4 | 37 | 6.7 | 0.5   | glucose                              | [383] |
| <i>Clostridium</i> | <i>tyrobutyricum</i>         | JM1        |      |  | 3.9  | 37 | 6.7 | 1     | glucose                              | [383] |
| <i>Clostridium</i> | <i>tyrobutyricum</i>         | ATCC 25755 | 2.97 |  |      | 37 | 5.7 | 0.073 | glucose                              | [384] |
| <i>Clostridium</i> | <i>tyrobutyricum</i>         | ATCC 25755 | 2.21 |  |      | 37 | 5.7 | 0.083 | glucose                              | [384] |
| <i>Clostridium</i> | <i>tyrobutyricum</i>         | ATCC 25755 | 2.62 |  |      | 37 | 5.7 | 0.125 | glucose                              | [384] |
| <i>Clostridium</i> | <i>tyrobutyricum</i>         | FYa102     | 0.61 |  |      | 35 | 6.0 | 0.056 | glucose, peptone                     | [385] |
| <i>Clostridium</i> | <i>tyrobutyricum</i>         | FYa102     | 1.42 |  |      | 35 | 6.0 | 0.056 | glucose, peptone, NH <sub>4</sub> Cl | [385] |
| <i>Clostridium</i> | <i>tyrobutyricum</i>         | FYa102     | 0.11 |  |      | 35 | 6.0 | 0.067 | glucose, peptone                     | [385] |
| <i>Clostridium</i> | <i>tyrobutyricum</i>         | FYa102     | 0.29 |  |      | 35 | 6.0 | 0.083 | glucose, peptone, NH <sub>4</sub> Cl | [385] |
| <i>Clostridium</i> | <i>tyrobutyricum</i>         | FYa102     | 0.97 |  |      | 35 | 6.0 | 0.083 | glucose, peptone                     | [385] |
| <i>Clostridium</i> | <i>tyrobutyricum</i>         | FYa102     | 0.58 |  |      | 35 | 6.0 | 0.125 | glucose, peptone, NH <sub>4</sub> Cl | [385] |
| <i>Clostridium</i> | <i>tyrobutyricum</i>         | FYa102     | 0.8  |  |      | 35 | 6.0 | 0.125 | glucose, peptone                     | [385] |
| <i>Clostridium</i> | <i>tyrobutyricum</i>         | FYa102     | 0.48 |  |      | 35 | 6.0 | 0.167 | glucose, peptone, NH <sub>4</sub> Cl | [385] |
| <i>Clostridium</i> | <i>tyrobutyricum</i>         | FYa102     | 1    |  |      | 35 | 6.0 | 0.167 | glucose, peptone                     | [385] |
| <i>Clostridium</i> | <i>tyrobutyricum</i>         | FYa102     | 0.34 |  | 17.4 | 35 | 6.0 | 0.25  | glucose, peptone, NH <sub>4</sub> Cl | [385] |
| <i>Clostridium</i> | <i>tyrobutyricum</i>         | FYa102     | 1.06 |  |      | 35 | 6.0 | 0.25  | glucose, peptone                     | [385] |
| <i>Clostridium</i> | <i>tyrobutyricum</i>         | FYa102     | 0.1  |  |      | 35 | 6.0 | 0.33  | glucose, peptone, NH <sub>4</sub> Cl | [385] |
| <i>Clostridium</i> | <i>tyrobutyricum</i>         | FYa102     | 0.55 |  |      | 35 | 6.0 | 0.33  | glucose, peptone                     | [385] |
| <i>Clostridium</i> | <i>tyrobutyricum</i>         | FYa102     | 0.18 |  |      | 35 | 6.0 | 0.4   | glucose, peptone, NH <sub>4</sub> Cl | [385] |
| <i>Clostridium</i> | <i>tyrobutyricum</i>         | FYa102     | 0.16 |  |      | 35 | 6.0 | 0.5   | glucose, peptone                     | [385] |
| <i>Clostridium</i> | <i>tyrobutyricum</i>         | FYa102     | 0.72 |  |      | 35 | 6.0 | 0.5   | glucose, peptone, NH <sub>4</sub> Cl | [385] |

|                     |                  |             |         |           |       |      |     |       |                                                                                |       |
|---------------------|------------------|-------------|---------|-----------|-------|------|-----|-------|--------------------------------------------------------------------------------|-------|
| <i>Enterobacter</i> | <i>aerogenes</i> | AY-2        | 1.4     |           |       | 37   | 6.3 | 0.2   | glucose                                                                        | [260] |
| <i>Enterobacter</i> | <i>aerogenes</i> | AY-2        | 1.1     |           | 58    | 37   | 7   | 0.67  | glucose                                                                        | [386] |
| <i>Enterobacter</i> | <i>aerogenes</i> | E.82005     | 1.8-3.5 |           | 10-13 | 37.5 | 6.0 |       | molasses                                                                       | [387] |
| <i>Enterobacter</i> | <i>aerogenes</i> | E.82005     | 1.5-2.5 |           | 20-36 | 38   | 6   | 0.267 | diluted molasses                                                               | [388] |
| <i>Enterobacter</i> | <i>aerogenes</i> | HO-39       |         |           | 6.24  | 37   | 5.8 |       | glucose                                                                        | [257] |
| <i>Enterobacter</i> | <i>aerogenes</i> | HO-39       | 0.56    |           | 20.08 | 37   | 6.5 | 0.067 | glucose                                                                        | [258] |
| <i>Enterobacter</i> | <i>aerogenes</i> | HO-39       | 0.81    |           | 10.71 | 37   | 6.5 | 0.25  | glucose                                                                        | [258] |
| <i>Enterobacter</i> | <i>aerogenes</i> | HO-39       | 0.73    |           | 37.92 | 37   | 6.5 | 1     | glucose                                                                        | [258] |
| <i>Enterobacter</i> | <i>aerogenes</i> | HU 101      | 0.55    |           | 30    | 37   | 7   | 0.67  | glucose                                                                        | [386] |
| <i>Enterobacter</i> | <i>aerogenes</i> | HU-101      | 0.8     |           |       | 37   | 6.3 | 0.2   | glucose                                                                        | [260] |
| <i>Enterobacter</i> | <i>aerogenes</i> | HU-101      |         |           | 30    | 37   | 6.8 | 0.8   | glycerol (from biodiesel)                                                      | [259] |
| <i>Enterobacter</i> | <i>aerogenes</i> | HU-101      |         |           | 63    | 37   | 6.8 | 1.2   | glycerol (from biodiesel)                                                      | [259] |
| <i>Enterobacter</i> | <i>aerogenes</i> | HU-101      |         |           | 80    | 37   | 6.8 | 1.3   | glycerol                                                                       | [259] |
| <i>Enterobacter</i> | <i>aerogenes</i> | NCIMB 10102 | 1.36    | 2.11      | 8.85  | 40   | 5.5 |       | corn starch hydrolysate,<br>feed flow rate: 32 cm <sup>3</sup> h <sup>-1</sup> | [389] |
| <i>Enterobacter</i> | <i>aerogenes</i> | NCIMB 10102 | 1.54    | 3.36      | 10.15 | 40   | 5.5 |       | corn starch hydrolysate,<br>feed flow rate: 40 cm <sup>3</sup> h <sup>-1</sup> | [389] |
| <i>Enterobacter</i> | <i>aerogenes</i> | NCIMB 10102 | 2.31    | 0.75      | 5.85  | 40   | 5.5 |       | corn starch hydrolysate,<br>feed flow rate: 12 cm <sup>3</sup> h <sup>-1</sup> | [389] |
| <i>Enterobacter</i> | <i>aerogenes</i> | NCIMB 10102 | 2.55    | 1.76      | 9.8   | 40   | 5.5 |       | corn starch hydrolysate,<br>feed flow rate: 24 cm <sup>3</sup> h <sup>-1</sup> | [389] |
| <i>Enterobacter</i> | <i>aerogenes</i> | NCIMB 10102 | 3.02    | 0.4       | 3.25  | 40   | 5.5 |       | corn starch hydrolysate,<br>feed flow rate: 4 cm <sup>3</sup> h <sup>-1</sup>  | [389] |
| <i>Enterobacter</i> | <i>aerogenes</i> | NCIMB 10102 |         | 0.33-2.83 |       | 40   | 5.5 |       | corn starch hydrolysate,<br>inlet concentration 20 mg<br>cm <sup>-3</sup>      | [390] |
| <i>Enterobacter</i> | <i>aerogenes</i> | NCIMB 10102 |         | 3.2-3.9   |       | 40   | 5.5 |       | corn starch hydrolysate,<br>inlet concentration 30 mg<br>cm <sup>-3</sup>      | [390] |
| <i>Enterobacter</i> | <i>aerogenes</i> | NCIMB 10102 |         | 8.3-9.8   |       | 40   | 5.5 |       | corn starch hydrolysate,<br>inlet concentration 40 mg<br>cm <sup>-3</sup>      | [390] |
| <i>Enterobacter</i> | <i>aerogenes</i> | NCIMB 10102 |         | 14.5-15.8 |       | 40   | 5.5 |       | corn starch hydrolysate,<br>inlet concentration 50 mg<br>cm <sup>-3</sup>      | [390] |
| <i>Enterobacter</i> | <i>cloacae</i>   | IIT-BT-08   |         |           | 66.7  | 37   |     | 0.93  | 0.5% (w/v) glucose                                                             | [47]  |



|                     |                |           |       |  |       |    |     |      |                                                                        |      |
|---------------------|----------------|-----------|-------|--|-------|----|-----|------|------------------------------------------------------------------------|------|
| <i>Enterobacter</i> | <i>cloacae</i> | IIT-BT-08 |       |  | 77.3  | 37 |     | 0.93 | 1% (w/v) glucose                                                       | [47] |
| <i>Enterobacter</i> | <i>cloacae</i> | IIT-BT-08 |       |  | 72.9  | 37 |     | 0.93 | 1.5% (w/v) glucose                                                     | [47] |
| <i>Enterobacter</i> | <i>cloacae</i> | IIT-BT-08 |       |  | 66.8  | 37 |     | 0.93 | 2% (w/v) glucose                                                       | [47] |
| <i>Enterobacter</i> | <i>cloacae</i> | IIT-BT-08 |       |  | 62.2  | 37 |     | 0.93 | 2.5% (w/v) glucose                                                     | [47] |
| <i>Enterobacter</i> | <i>cloacae</i> | IIT-BT-08 |       |  | 62.6  | 37 |     | 0.93 | 3% (w/v) glucose                                                       | [47] |
| <i>Enterobacter</i> | <i>cloacae</i> | IIT-BT-08 |       |  | 60.8  | 37 |     | 0.93 | 3.5% (w/v) glucose                                                     | [47] |
| <i>Enterobacter</i> | <i>cloacae</i> | IIT-BT-08 |       |  | 62.5  | 37 |     | 0.93 | glucose, tubular<br>bioreactor, packing<br>material coir               | [47] |
| <i>Enterobacter</i> | <i>cloacae</i> | IIT-BT-08 |       |  | 65.2  | 37 |     | 0.93 | glucose, tapered<br>bioreactor, packing<br>material coir               | [47] |
| <i>Enterobacter</i> | <i>cloacae</i> | IIT-BT-08 |       |  | 71    | 37 |     | 0.93 | glucose, rhomboid<br>bioreactor, packing<br>material coir              | [47] |
| <i>Enterobacter</i> | <i>cloacae</i> | IIT-BT-08 |       |  | 44    | 37 |     | 0.93 | glucose, rhomboid<br>bioreactor, packing<br>material rice straw        | [47] |
| <i>Enterobacter</i> | <i>cloacae</i> | IIT-BT-08 |       |  | 52    | 37 |     | 0.93 | glucose, rhomboid<br>bioreactor, packing<br>material bagasse           | [47] |
| <i>Enterobacter</i> | sp.            | BY-29     | 0.73  |  | 0.2   | 37 | 7.0 | 0.2  | glucose, cells<br>immobilized, glass column<br>bioreactor              | [56] |
| <i>Enterobacter</i> | sp.            | BY-29     | 0.76  |  | 0.2   | 37 | 7.0 | 0.2  | glucose, cells<br>immobilized, continuously<br>stirred tank bioreactor | [56] |
| <i>Enterobacter</i> | sp.            | BY-29     | 0.79  |  | 0.2   | 37 | 7.0 | 0.2  | glucose, free cells,<br>continuously stirred tank<br>bioreactor        | [56] |
| <i>Enterobacter</i> | sp.            | BY-29     | 0.625 |  | 0.25  | 37 | 7.0 | 0.33 | glucose, free cells,<br>continuously stirred tank<br>bioreactor        | [56] |
| <i>Enterobacter</i> | sp.            | BY-29     | 0.67  |  | 0.275 | 37 | 7.0 | 0.33 | glucose, cells<br>immobilized, continuously<br>stirred tank bioreactor | [56] |
| <i>Enterobacter</i> | sp.            | BY-29     | 0.71  |  | 0.3   | 37 | 7.0 | 0.33 | glucose, cells<br>immobilized, glass column<br>bioreactor              | [56] |

|                     |             |                   |       |  |       |    |     |      |                                                                  |       |
|---------------------|-------------|-------------------|-------|--|-------|----|-----|------|------------------------------------------------------------------|-------|
| <i>Enterobacter</i> | sp.         | BY-29             | 0.41  |  | 0.42  | 37 | 7.0 | 1    | glucose, free cells, continuously stirred tank bioreactor        | [56]  |
| <i>Enterobacter</i> | sp.         | BY-29             | 0.5   |  | 0.585 | 37 | 7.0 | 1    | glucose, cells immobilized, continuously stirred tank bioreactor | [56]  |
| <i>Enterobacter</i> | sp.         | BY-29             | 0.625 |  | 0.775 | 37 | 7.0 | 1    | glucose, cells immobilized, glass column bioreactor              | [56]  |
| <i>Escherichia</i>  | <i>coli</i> | BL-21 recombinant |       |  | 54    | 37 | 6   | 0.25 | glucose                                                          | [356] |
| <i>Escherichia</i>  | <i>coli</i> | BL-21 recombinant |       |  | 86.84 | 37 | 6   | 0.25 | molasse                                                          | [356] |
| <i>Escherichia</i>  | <i>coli</i> | BL-21 recombinant |       |  | 52.8  | 37 | 6   | 0.31 | glucose                                                          | [356] |
| <i>Escherichia</i>  | <i>coli</i> | BL-21 recombinant |       |  | 97.04 | 37 | 6   | 0.37 | molasse                                                          | [356] |
| <i>Escherichia</i>  | <i>coli</i> | BL-21 recombinant |       |  | 46.6  | 37 | 6   | 0.50 | glucose                                                          | [356] |
| <i>Escherichia</i>  | <i>coli</i> | BL-21 recombinant |       |  | 59.7  | 37 | 6   | 0.50 | molasse                                                          | [356] |
| <i>Escherichia</i>  | <i>coli</i> | BL-21 recombinant |       |  | 66    | 37 | 6   | 0.55 | glucose                                                          | [356] |
| <i>Escherichia</i>  | <i>coli</i> | BL-21 recombinant |       |  | 48.8  | 37 | 6   | 0.62 | glucose                                                          | [356] |
| <i>Escherichia</i>  | <i>coli</i> | BL-21 recombinant |       |  | 51.79 | 37 | 6   | 0.66 | molasse                                                          | [356] |
| <i>Escherichia</i>  | <i>coli</i> | BL-21 recombinant |       |  | 32.67 | 37 | 6   | 0.80 | molasse                                                          | [356] |
| <i>Escherichia</i>  | <i>coli</i> | BL-21 recombinant |       |  | 43.3  | 37 | 6   | 0.81 | glucose                                                          | [356] |
| <i>Escherichia</i>  | <i>coli</i> | DJT135            | 2.36  |  |       | 37 | 6.4 | 0.01 | glucose, sulphur limitation                                      | [391] |
| <i>Escherichia</i>  | <i>coli</i> | DJT135            | 2.39  |  |       | 37 | 6.4 | 0.01 | glucose, phosphate limitation                                    | [391] |
| <i>Escherichia</i>  | <i>coli</i> | DJT135            | 0.45  |  |       | 37 | 6.4 | 0.1  | glucose, sulphur limitation                                      | [391] |
| <i>Escherichia</i>  | <i>coli</i> | DJT135            | 2.55  |  |       | 37 | 6.4 | 0.1  | glucose, phosphate limitation                                    | [391] |
| <i>Escherichia</i>  | <i>coli</i> | DJT135            | 0.26  |  |       | 37 | 6.4 | 0.3  | glucose, sulphur limitation                                      | [391] |
| <i>Escherichia</i>  | <i>coli</i> | DJT135            | 0.78  |  |       | 37 | 6.4 | 0.3  | glucose, phosphate limitation                                    | [391] |
| <i>Escherichia</i>  | <i>coli</i> | JW135             | 0.24  |  |       | 37 | 6.4 | 0.1  | glucose, glucose limitation                                      | [391] |

|                       |                   |           |       |       |       |    |         |        |                                 |       |
|-----------------------|-------------------|-----------|-------|-------|-------|----|---------|--------|---------------------------------|-------|
| <i>Escherichia</i>    | <i>coli</i>       | JW135     | 0.31  |       |       | 37 | 6.4     | 0.1    | glucose, sulphur limitation     | [391] |
| <i>Escherichia</i>    | <i>coli</i>       | JW135     | 0.36  |       |       | 37 | 6.4     | 0.1    | glucose, phosphate limitation   | [391] |
| <i>Escherichia</i>    | <i>coli</i>       | JW135     | 0.46  |       |       | 37 | 6.4     | 0.1    | glucose, nitrogen limitation    | [391] |
| <i>Escherichia</i>    | <i>coli</i>       | JW135     | 0.12  |       |       | 37 | 6.4     | 0.3    | glucose, glucose limitation     | [391] |
| <i>Escherichia</i>    | <i>coli</i>       | JW135     | 0.137 |       |       | 37 | 6.4     | 0.3    | glucose, phosphate limitation   | [391] |
| <i>Escherichia</i>    | <i>coli</i>       | JW135     | 0.139 |       |       | 37 | 6.4     | 0.3    | glucose, nitrogen limitation    | [391] |
| <i>Escherichia</i>    | <i>coli</i>       | JW135     | 0.16  |       |       | 37 | 6.4     | 0.3    | glucose, sulphur limitation     | [391] |
| <i>Escherichia</i>    | <i>coli</i>       | SR14      |       | 105   |       | 37 | 6.0     | 0.5    | formate                         | [353] |
| <i>Escherichia</i>    | <i>coli</i>       | SR14      |       | 125   |       | 37 | 6.0     | 1      | formate                         | [353] |
| <i>Escherichia</i>    | <i>coli</i>       | SR14      |       | 144.2 |       | 37 | 6.0     | 2      | formate                         | [353] |
| <i>Ethanoligenens</i> | <i>harbinense</i> | YUAN-3    | 1.92  |       | 32.2  | 35 | 5.0     | 0.4    | glucose                         | [279] |
| <i>Klebsiella</i>     | <i>oxytoca</i>    | HP1       | 3.6   | 15.2  | 15.62 | 38 | 6.5     |        | sucrose                         | [286] |
| <i>Klebsiella</i>     | <i>pneumoniae</i> | DSM 2026  |       | 12.2  |       | 37 | 6.8     | 0.16   | glycerol                        | [392] |
| <i>Klebsiella</i>     | <i>pneumoniae</i> | DSM 2026  |       | 16    |       | 37 | 7.0     | 0.2    | glycerol                        | [392] |
| <i>Klebsiella</i>     | <i>pneumoniae</i> | DSM 2026  |       | 15    |       | 37 | 7.0     | 0.4    | glycerol                        | [392] |
| <i>Klebsiella</i>     | <i>pneumoniae</i> | DSM 2026  |       | 29.6  |       |    |         |        | glycerol                        | [118] |
| <i>Pyrococcus</i>     | <i>furius</i>     | DSM 3638  | 3.8   |       | 6.24  | 90 |         | 0.45   | cellobiose                      | [393] |
| <i>Pyrococcus</i>     | <i>furius</i>     | DSM 3638  |       |       | 3.66  | 90 |         | 0.45   | cellobiose, sodium sulphide     | [393] |
| <i>Pyrococcus</i>     | <i>furius</i>     | DSM 3638  | 2.6   |       | 2.35  | 90 |         | 0.45   | maltose                         | [393] |
| <i>Pyrococcus</i>     | <i>furius</i>     | DSM 3638  |       | 69    |       |    | 6.5     |        | maltose, no sulphur source used | [394] |
| <i>Pyrococcus</i>     | <i>furius</i>     | DSM 3638  |       | 102   |       |    | 6.5     |        | maltose, sulphur source used    | [394] |
| <i>Ruminococcus</i>   | <i>albus</i>      | DSM 20455 | 1     |       |       | 37 |         | 0.024  | sorghum extract                 | [291] |
| <i>Ruminococcus</i>   | <i>albus</i>      | DSM 20455 | 1.07  |       |       | 37 | 6.4-6.5 | 0.024  | glucose                         | [292] |
| <i>Ruminococcus</i>   | <i>albus</i>      | DSM 20455 | 0.47  |       |       | 37 | 6.4-6.5 | 0.0278 | glucose                         | [292] |
| <i>Ruminococcus</i>   | <i>albus</i>      | DSM 20455 | 0.54  |       |       | 37 | 6.4-6.5 | 0.042  | glucose                         | [292] |

|                                                                   |                                                        |                                     |             |      |      |    |         |       |                          |       |
|-------------------------------------------------------------------|--------------------------------------------------------|-------------------------------------|-------------|------|------|----|---------|-------|--------------------------|-------|
| <i>Ruminococcus</i>                                               | <i>albus</i>                                           | strain 7                            | 2.11-2.49   |      |      |    | 6.7-6.8 | 0.17  | glucose                  | [395] |
| <i>Ruminococcus</i>                                               | <i>albus</i>                                           | strain 7                            | 1.76-2.75   |      |      |    | 6.7-6.8 | 0.25  | glucose                  | [395] |
| <i>Ruminococcus</i>                                               | <i>albus</i>                                           | strain 7                            | 2.78-3.1    |      |      |    | 6.7-6.8 | 0.33  | glucose                  | [395] |
| <i>Ruminococcus</i>                                               | <i>albus</i>                                           | strain 7                            | 1.70        |      |      |    | 6.7-6.8 | 0.49  | glucose                  | [395] |
| <i>Ruminococcus</i>                                               | <i>albus</i>                                           | strain 7                            | 1.72-2.64   |      |      |    | 6.7-6.8 | 0.59  | glucose                  | [395] |
| <i>Ruminococcus</i>                                               | <i>flavefaciens</i>                                    | FD-1                                | 0.376-0.590 |      |      |    | 6.56    |       | cellulose                | [396] |
| <i>Thermococcus</i>                                               | <i>kodakaraensis</i>                                   | JCM 12380                           | 1.09        | 24.9 | 3.88 | 85 | 6.8     | 0.2   | pyruvate                 | [397] |
| <i>Thermococcus</i>                                               | <i>kodakaraensis</i>                                   | JCM 12380                           | 3.33        | 14.0 | 3.16 | 85 | 6.8     | 0.2   | starch                   | [397] |
| <i>Thermococcus</i>                                               | <i>kodakaraensis</i>                                   | JCM 12380                           |             | 59.6 |      | 85 | 6.8     | 0.8   | pyruvate                 | [397] |
| <i>Thermotoga</i>                                                 | <i>elfii</i>                                           |                                     | 4           |      |      | 65 |         |       | biomass                  | [398] |
| <i>Enterobacter</i><br><i>Enterobacter</i><br><i>Enterobacter</i> | <i>aerogenes</i><br><i>cloacae</i><br><i>sakazakii</i> | IAM 12348<br>IAM 12349<br>IAM 12660 | 0.62        |      | 1.56 | 35 | 5.5     | 0.167 | 3000 ppm bean curd waste | [399] |
| <i>Enterobacter</i><br><i>Enterobacter</i><br><i>Enterobacter</i> | <i>aerogenes</i><br><i>cloacae</i><br><i>sakazakii</i> | IAM 12348<br>IAM 12349<br>IAM 12660 | 0.16        |      | 0.54 | 35 | 5.5     | 0.167 | 4000 ppm bean curd waste | [399] |
| <i>Enterobacter</i><br><i>Enterobacter</i><br><i>Enterobacter</i> | <i>aerogenes</i><br><i>cloacae</i><br><i>sakazakii</i> | IAM 12348<br>IAM 12349<br>IAM 12660 | 0.52        |      | 2.23 | 35 | 5.5     | 0.167 | 5000 ppm bean curd waste | [399] |
| <i>Clostridium</i><br><i>Enterobacter</i>                         | <i>butyricum</i><br><i>aerogenes</i>                   | IFO 13949<br>HO-39                  | 2.1         |      | 22.3 | 36 | 5.2     | 0.2   | starch                   | [122] |
| <i>Clostridium</i><br><i>Enterobacter</i>                         | <i>butyricum</i><br><i>aerogenes</i>                   | IFO 13949<br>HO-39                  | 2.5         |      | 35.7 | 36 | 5.2     | 0.5   | starch                   | [122] |
| <i>Clostridium</i><br><i>Enterobacter</i>                         | <i>butyricum</i><br><i>aerogenes</i>                   | IFO 13949<br>HO-39                  | 2.6         |      | 58   | 36 | 5.2     | 1     | starch                   | [122] |
| <i>Citrobacter</i><br><i>Enterobacter</i>                         | <i>freundii</i><br><i>cloacae</i>                      | Cf1<br>Ecl                          | 2.33        |      | 35   | 37 |         | 0.11  | sucrose                  | [400] |
| <i>Citrobacter</i><br><i>Enterobacter</i>                         | <i>freundii</i><br><i>cloacae</i>                      | Cf1<br>Ecl                          | 2.33        |      | 180  | 37 |         | 0.22  | sucrose                  | [400] |
| <i>Ruminococcus</i><br><i>Vibrio</i>                              | <i>albus</i><br><i>succinogenes</i>                    | strain 7                            | 3.76        |      |      |    | 6.7-6.8 | 0.11  | glucose                  | [395] |
| <i>Ruminococcus</i><br><i>Vibrio</i>                              | <i>albus</i><br><i>succinogenes</i>                    | strain 7                            | 3.59        |      |      |    | 6.7-6.8 | 0.12  | glucose                  | [395] |
| <i>Ruminococcus</i><br><i>Vibrio</i>                              | <i>albus</i><br><i>succinogenes</i>                    | strain 7                            | 3.91-3.98   |      |      |    | 6.7-6.8 | 0.19  | glucose                  | [395] |

|                                                      |                                           |                       |           |      |      |    |             |      |                                                  |       |
|------------------------------------------------------|-------------------------------------------|-----------------------|-----------|------|------|----|-------------|------|--------------------------------------------------|-------|
| <i>Ruminococcus<br/>Vibrio</i>                       | <i>albus<br/>succinogenes</i>             | strain 7              | 3.83      |      |      |    | 6.7-<br>6.8 | 0.33 | glucose                                          | [395] |
| <i>Ruminococcus<br/>Vibrio</i>                       | <i>albus<br/>succinogenes</i>             | strain 7              | 4.59      |      |      |    | 6.7-<br>6.8 | 0.35 | glucose                                          | [395] |
| <i>Ruminococcus<br/>Vibrio</i>                       | <i>albus<br/>succinogenes</i>             | strain 7              | 3.13-3.89 |      |      |    | 6.7-<br>6.8 | 0.65 | glucose                                          | [395] |
| <i>Caldicellulosiruptor<br/>Caldicellulosiruptor</i> | <i>saccharolyticus<br/>kristjanssonii</i> | DSM 8903<br>DSM 12137 | 3.5       | 12.7 | 3.8  | 70 | 6.7         | 0.04 | 5 g/L glucose, 5 g/L<br>xylose                   | [34]  |
| <i>Caldicellulosiruptor<br/>Caldicellulosiruptor</i> | <i>saccharolyticus<br/>kristjanssonii</i> | DSM 8903<br>DSM 12137 | 3.6       | 14.2 | 4.3  | 70 | 6.7         | 0.06 | 5 g/L glucose, 5 g/L<br>xylose                   | [34]  |
| <i>Caldicellulosiruptor<br/>Caldicellulosiruptor</i> | <i>saccharolyticus<br/>kristjanssonii</i> | DSM 8903<br>DSM 12137 | 3.5       | 15.5 | 6.2  | 70 | 6.7         | 0.08 | 5 g/L glucose, 5 g/L<br>xylose                   | [34]  |
| <i>Caldicellulosiruptor<br/>Caldicellulosiruptor</i> | <i>saccharolyticus<br/>kristjanssonii</i> | DSM 8903<br>DSM 12137 | 3.1       | 15   | 8.3  | 70 | 6.7         | 0.12 | 5 g/L glucose, 5 g/L<br>xylose                   | [34]  |
| <i>Caldicellulosiruptor<br/>Caldicellulosiruptor</i> | <i>saccharolyticus<br/>kristjanssonii</i> | DSM 8903<br>DSM 12137 | 2.9       | 18.4 | 10.3 | 70 | 6.7         | 0.15 | 5 g/L glucose, 5 g/L<br>xylose                   | [34]  |
| <i>Caldicellulosiruptor<br/>Caldicellulosiruptor</i> | <i>saccharolyticus<br/>kristjanssonii</i> | DSM 8903<br>DSM 12137 | 2.8       | 18.3 | 11   | 70 | 6.7         | 0.2  | 5 g/L glucose, 5 g/L<br>xylose                   | [34]  |
| <i>Caldicellulosiruptor<br/>Caldicellulosiruptor</i> | <i>saccharolyticus<br/>kristjanssonii</i> | DSM 8903<br>DSM 12137 | 2.9       | 21   | 11.6 | 70 | 6.7         | 0.25 | 5 g/L glucose, 5 g/L<br>xylose                   | [34]  |
| <i>Caldicellulosiruptor<br/>Caldicellulosiruptor</i> | <i>saccharolyticus<br/>kristjanssonii</i> | DSM 8903<br>DSM 12137 | 2.5       | 21   | 11.6 | 70 | 6.7         | 0.3  | 5 g/L glucose, 5 g/L<br>xylose                   | [34]  |
| <i>Caldicellulosiruptor<br/>Caldicellulosiruptor</i> | <i>saccharolyticus<br/>kristjanssonii</i> | DSM 8903<br>DSM 12137 | 3.6       | 10.2 | 4.5  | 70 | 6.7         | 0.06 | 4 g/L glucose, 4 g/L<br>xylose                   | [34]  |
| <i>Caldicellulosiruptor<br/>Caldicellulosiruptor</i> | <i>saccharolyticus<br/>kristjanssonii</i> | DSM 8903<br>DSM 12137 | 3.2       | 24.7 | 8.6  | 70 | 6.7         | 0.15 | 4 g/L glucose, 4 g/L<br>xylose                   | [34]  |
| <i>Caldicellulosiruptor<br/>Caldicellulosiruptor</i> | <i>saccharolyticus<br/>kristjanssonii</i> | DSM 8903<br>DSM 12137 | 3.7       | 14.8 | 4.8  | 70 | 6.7         | 0.06 | glucose                                          | [34]  |
| <i>Caldicellulosiruptor<br/>Caldicellulosiruptor</i> | <i>saccharolyticus<br/>kristjanssonii</i> | DSM 8903<br>DSM 12137 | 3.5       | 21.4 | 10.4 | 70 | 6.7         | 0.15 | glucose                                          | [34]  |
| <i>Caldicellulosiruptor<br/>Caldicellulosiruptor</i> | <i>saccharolyticus<br/>kristjanssonii</i> | DSM 8903<br>DSM 12137 | 2.7       | 22.6 | 3    | 70 | 6.7         | 0.06 | xylose                                           | [34]  |
| <i>Caldicellulosiruptor<br/>Caldicellulosiruptor</i> | <i>saccharolyticus<br/>kristjanssonii</i> | DSM 8903<br>DSM 12137 | 2.7       | 33   | 8.5  | 70 | 6.7         | 0.06 | xylose                                           | [34]  |
| <i>Clostridium<br/>Thermoanaerobacterium</i>         | sp.<br>sp.                                | AK 15<br>AK 17        | 0.39      |      | 0.78 | 60 | 6.0         | 0.16 | 2.0 mmol glucose L <sup>-1</sup> h <sup>-1</sup> | [331] |
| <i>Clostridium<br/>Thermoanaerobacterium</i>         | sp.<br>sp.                                | AK 15<br>AK 17        | 0.53      |      | 1.5  | 60 | 6.0         | 0.16 | 2.8 mmol glucose L <sup>-1</sup> h <sup>-1</sup> | [331] |
| <i>Clostridium<br/>Thermoanaerobacterium</i>         | sp.<br>sp.                                | AK 15<br>AK 17        | 0.55      |      | 2.18 | 60 | 6.0         | 0.16 | 4.0 mmol glucose L <sup>-1</sup> h <sup>-1</sup> | [331] |
| <i>Clostridium<br/>Thermoanaerobacterium</i>         | sp.<br>sp.                                | AK 15<br>AK 17        | 0.8       |      | 4.43 | 60 | 6.0         | 0.24 | glucose                                          | [331] |

|                                                    |            |                |      |  |      |    |     |      |         |       |
|----------------------------------------------------|------------|----------------|------|--|------|----|-----|------|---------|-------|
| <i>Clostridium</i><br><i>Thermoanaerobacterium</i> | sp.<br>sp. | AK 15<br>AK 17 | 0.8  |  | 6.1  | 60 | 6.0 | 0.32 | glucose | [331] |
| <i>Clostridium</i><br><i>Thermoanaerobacterium</i> | sp.<br>sp. | AK 15<br>AK 17 | 0.63 |  | 5.31 | 60 | 6.0 | 0.36 | glucose | [331] |

\* for reference please refer to manuscript
