# Supplementary material for: A comprehensive and quantitative review of dark fermentative biohydrogen production
Source: PubMed Central journal article supplement (PMC3443015; doi:10.1186/1475-2859-11-115), 2012-08-27
Supplement: 1475-2859-11-115-S5.pdf [file 1475-2859-11-115-S5.pdf]

**Additional file 5:** Fed-batch dark fermentative biohydrogen production

| <b>Genus</b>       | <b>Species</b>       | <b>Strain</b>          | <b><math>Y_{(H_2/S)}</math><br/>[mol mol<sup>-1</sup>]</b> | <b>Temperature<br/>[ °C]</b> | <b>pH</b> | <b>Substrate and<br/>discriminative condition</b> | <b>Reference<sup>†</sup></b> |
|--------------------|----------------------|------------------------|------------------------------------------------------------|------------------------------|-----------|---------------------------------------------------|------------------------------|
| <i>Clostridium</i> | <i>tyrobutyricum</i> | ATCC 25755             | 1.43                                                       | 37                           | 6.0       | glucose, free cells                               | [38]                         |
| <i>Clostridium</i> | <i>tyrobutyricum</i> | ATCC 25755 recombinant | 1.56                                                       | 37                           | 5.0       | xylose, cells immobilized                         | [38]                         |
| <i>Clostridium</i> | <i>tyrobutyricum</i> | ATCC 25755 recombinant | 2.06                                                       | 37                           | 6.0       | glucose, cells immobilized                        | [38]                         |
| <i>Clostridium</i> | <i>tyrobutyricum</i> | ATCC 25755 recombinant | 2.06                                                       | 37                           | 5.0       | glucose, cells immobilized                        | [38]                         |
| <i>Clostridium</i> | <i>tyrobutyricum</i> | ATCC 25755 recombinant | 2.15                                                       | 37                           | 6.0       | glucose, free cells                               | [38]                         |

<sup>†</sup> for reference please refer to manuscript
